# Supplementary material
Source: publisher figshare collection journal article supplement (https://diabetesjournals.figshare.com/articles/dataset/_/23739468)
Supplement: Supplementary file 1 [file 1]

## Sheet: BMI variants
Supplementary Table 6: Genetic variants included in the BMI genetic score and their association with changes in weight and waist circumference.
We selected independent lead variants with P<5x10-8 within ± 500 kb based on the summary statistics by Yengo et al. [PMID 30124842]. SNPs with imputation score <0.7 were excluded. The final BMI genetic score included 894 independent variants. The effect sizes, standard errors (SE), sample sizes (N), P values, and FDR-adjusted P values are reported for the weight and waist circumference losses fro…
										Waist circumference loss baseline to year 1					Waist circumference change year 1 to year 2					Waist circumference change year 1 to year 4					Weight loss baseline to year 1					Weight change year 1 to year 2					Weight change year 1 to year 4
						Results from GWAS by Yengo et al.			Look AHEAD	Adjustments: Intervention, sex, baseline age, PC1 - PC4, baseline weight, height, and waist circumference.					Adjustments: Intervention, sex, baseline age, PC1 - PC4, baseline weight, height, and waist circumference, weight and waist circumference year 1, weight year 2.					Adjustments: Intervention, sex, baseline age, PC1 - PC4, baseline weight, height, and waist circumference, weight and waist circumference year 1, weight year 4.					Adjustments: Intervention, sex, baseline age, PC1 - PC4, baseline weight and height.					Adjustments: Intervention, sex, baseline age, PC1 - PC4, baseline weight and height, and weight year 1.					Adjustments: Intervention, sex, baseline age, PC1 - PC4, baseline weight and height, and weight year 1.
Trait	SNP	CHR	POS, build 37	A1	A2	Beta (A1)	P Value	N	MAF (A1)	Beta (A1)	SE	N	P	Padjusted	Beta (A1)	SE	N	P	Padjusted	Beta (A1)	SE	N	P	Padjusted	Beta (A1)	SE	N	P	Padjusted	Beta (A1)	SE	N	P	Padjusted	Beta (A1)	SE	N	P	Padjusted
BMI	rs2489676	1	190804630	T	G	-0.01	8.8e-09	689550	0.4201	0.189748	0.257106	1405	0.460631	0.916639	0.085515	0.147586	1367	0.562398	0.952555	0.0756152	0.160387	1372	0.637392	0.990772	0.151807	0.220707	1416	0.491679	0.966161	0.134677	0.18787	1386	0.47358	0.967971	-0.0004896	0.283112	1388	0.998621	0.998621
BMI	rs4663629	2	236801872	A	G	0.0133	1.1e-10	686571	0.2161	0.247753	0.314477	1405	0.430933	0.916639	-0.228662	0.180722	1367	0.205994	0.943145	0.0421487	0.197399	1372	0.830953	0.990772	0.0802729	0.270546	1416	0.766734	0.966161	0.0218976	0.23062	1386	0.924367	0.999322	0.00266686	0.348776	1388	0.9939	0.995834
BMI	rs17450772	8	118895712	C	T	0.0189	2.9e-10	525306	0.1366	-0.304668	0.373566	1405	0.414887	0.916639	0.231054	0.214389	1367	0.281345	0.943145	0.408334	0.23404	1372	0.0812608	0.978631	-0.18812	0.321299	1416	0.558307	0.966161	-0.0215765	0.273301	1386	0.937086	0.999322	0.00335478	0.41375	1388	0.993532	0.995834
BMI	rs10811901	9	23356935	G	A	-0.0111	2.5e-11	768325	0.416	0.110987	0.262306	1405	0.672273	0.965048	0.129701	0.15078	1367	0.389834	0.943145	-0.0520438	0.163658	1372	0.750532	0.990772	0.215794	0.225332	1416	0.338393	0.966161	-0.0113259	0.191916	1386	0.952949	0.999322	-0.0034756	0.289121	1388	0.99041	0.995834
BMI	rs10852521	16	53804965	T	C	-0.0636	0	793891	0.4374	-0.113642	0.261251	1405	0.663634	0.965048	-0.0301312	0.150566	1367	0.841417	0.993871	-0.0481488	0.163866	1372	0.768933	0.990772	-0.338753	0.224373	1416	0.131325	0.966161	-0.005566	0.191535	1386	0.976821	0.999322	-0.0030845	0.289474	1388	0.9915	0.995834
BMI	rs559231	18	39644247	T	G	0.0135	2.4e-14	685154	0.4825	-0.378802	0.277928	1405	0.173118	0.916639	-0.197337	0.160109	1367	0.21797	0.943145	-0.246898	0.173719	1372	0.155473	0.978631	-0.271235	0.238944	1416	0.25651	0.966161	-0.19632	0.203308	1386	0.334401	0.967971	0.00202986	0.306685	1388	0.99472	0.995834
BMI	rs12607207	18	51560823	T	C	-0.0116	3.7e-09	691603	0.2087	0.110938	0.334581	1405	0.740262	0.973405	0.0148175	0.193896	1367	0.939096	0.997005	0.0434493	0.208503	1372	0.834958	0.990772	-0.166844	0.287618	1416	0.561947	0.966161	-0.189559	0.24611	1386	0.441302	0.967971	-0.0039523	0.368058	1388	0.991434	0.995834
BMI	rs6121381	20	30785593	T	A	0.0147	9.4e-10	691119	0.2053	0.0979076	0.335525	1405	0.77048	0.973405	0.00144406	0.193024	1367	0.994032	0.997005	0.00592806	0.211036	1372	0.977594	0.997535	-0.128749	0.288798	1416	0.655802	0.966161	0.0454295	0.24615	1386	0.853601	0.999322	-0.0063122	0.372711	1388	0.98649	0.995291
BMI	rs11056875	12	16470918	T	C	0.0138	1.1e-08	691176	0.2084	-0.162534	0.337894	1405	0.630576	0.955483	0.0741672	0.193815	1367	0.702024	0.97304	0.234067	0.211082	1372	0.267673	0.978631	-0.0816687	0.290611	1416	0.778733	0.966161	0.14102	0.246967	1386	0.568088	0.967971	0.00585262	0.373425	1388	0.987498	0.995291
BMI	rs17685	7	75616105	A	G	0.0114	7.1e-09	637984	0.253	-0.288209	0.30067	1405	0.337949	0.916639	0.231884	0.172708	1367	0.179614	0.943145	0.148614	0.18755	1372	0.428269	0.990772	-0.164374	0.258654	1416	0.525208	0.966161	0.0816678	0.219443	1386	0.709832	0.999322	0.0953401	0.331488	1388	0.773687	0.991747
BMI	rs13201877	6	137675541	G	A	0.0152	2.7e-10	790570	0.1136	-1.05107	0.411246	1405	0.0106992	0.757624	-0.334559	0.23603	1367	0.156584	0.943145	-0.478068	0.260215	1372	0.0663978	0.978631	-0.633569	0.354442	1416	0.0740707	0.966161	-0.111805	0.301374	1386	0.710706	0.999322	-0.556899	0.459478	1388	0.225711	0.991747
BMI	rs13250058	8	112270826	G	T	-0.0112	2.9e-10	787870	0.4382	0.537131	0.320001	1405	0.0934686	0.875461	-0.351727	0.184592	1367	0.0569365	0.943145	-0.0831463	0.200361	1372	0.678221	0.990772	0.378122	0.274769	1416	0.168995	0.966161	-0.0865388	0.2348	1386	0.71251	0.999322	-0.121611	0.353247	1388	0.730698	0.991747
BMI	rs7164727	15	73093991	C	T	-0.0182	3.3e-25	791156	0.3975	0.19637	0.268886	1405	0.465324	0.916639	-0.124266	0.154661	1367	0.421844	0.943145	-0.0829325	0.167988	1372	0.62161	0.990772	-0.1416	0.230955	1416	0.539905	0.966161	0.0721763	0.196547	1386	0.71351	0.999322	-0.406361	0.296019	1388	0.170053	0.991747
BMI	rs945211	1	32191798	G	C	-0.013	4.5e-13	678874	0.3611	-0.0882641	0.276422	1405	0.74954	0.973405	0.0561075	0.158857	1367	0.723997	0.979616	-0.0788721	0.172545	1372	0.647665	0.990772	-0.154929	0.237583	1416	0.51444	0.966161	-0.0738665	0.202259	1386	0.715013	0.999322	-0.301513	0.304425	1388	0.322137	0.991747
BMI	rs1465900	11	76473138	C	A	-0.0125	4.8e-10	779748	0.2645	0.238526	0.30665	1405	0.436793	0.916639	0.00740902	0.175588	1367	0.966349	0.997005	-0.142597	0.191381	1372	0.456343	0.990772	0.0102087	0.263704	1416	0.969125	0.985462	-0.0816199	0.223843	1386	0.715443	0.999322	-0.238918	0.337971	1388	0.479737	0.991747
BMI	rs11716779	3	47606215	G	A	0.0129	3.7e-11	689735	0.2037	-0.0375578	0.332568	1405	0.9101	0.98481	-0.120672	0.191793	1367	0.529341	0.943145	0.135515	0.208058	1372	0.514942	0.990772	-0.0263104	0.285289	1416	0.926534	0.984638	-0.0887304	0.243774	1386	0.715924	0.999322	-0.157601	0.365742	1388	0.666604	0.991747
BMI	rs4814512	20	16564210	C	A	-0.0133	2.3e-10	692559	0.1831	0.690319	0.337267	1405	0.0408646	0.869587	0.546608	0.193674	1367	0.00483762	0.644967	0.265482	0.211741	1372	0.210129	0.978631	0.00889688	0.289706	1416	0.975505	0.985462	0.0891105	0.246288	1386	0.717546	0.999322	-0.0744212	0.372477	1388	0.841666	0.991747
BMI	rs1658820	8	4288577	T	G	0.0141	5.9e-12	669427	0.3016	0.147319	0.291529	1405	0.613407	0.952961	0.0420502	0.167337	1367	0.801628	0.992591	-0.0329648	0.182485	1372	0.856674	0.990772	-0.114451	0.249728	1416	0.646807	0.966161	0.0764004	0.212568	1386	0.719339	0.999322	0.172464	0.32085	1388	0.590994	0.991747
BMI	rs1426284	18	58738938	G	A	-0.0374	1.3e-14	666557	0.03612	0.548167	0.79747	1405	0.491956	0.916639	0.349721	0.455571	1367	0.442827	0.943145	0.107232	0.499852	1372	0.830169	0.990772	-0.252032	0.674953	1416	0.708903	0.966161	-0.204874	0.571982	1386	0.720261	0.999322	0.0198719	0.869175	1388	0.981763	0.991747
BMI	rs11781222	8	23389571	C	T	-0.0158	5.3e-11	789828	0.1201	-0.473213	0.390737	1405	0.226071	0.916639	-0.346946	0.224448	1367	0.122392	0.943145	-0.285646	0.244747	1372	0.243372	0.978631	-0.867817	0.335306	1416	0.00974921	0.966161	0.101079	0.286222	1386	0.72403	0.999322	-0.203887	0.430784	1388	0.63608	0.991747
BMI	rs1467693	13	98129710	A	T	0.0114	1.2e-09	686978	0.3043	-0.249724	0.290003	1405	0.389326	0.916639	0.0749132	0.166658	1367	0.653142	0.968423	0.34984	0.180668	1372	0.0530302	0.92974	-0.187069	0.24968	1416	0.453843	0.966161	-0.0744189	0.212388	1386	0.726099	0.999322	0.133088	0.320028	1388	0.677574	0.991747
BMI	rs7220138	17	42254011	G	C	0.0123	2.7e-10	638185	0.3732	-0.20937	0.280646	1405	0.455775	0.916639	0.167414	0.161696	1367	0.300684	0.943145	-0.121324	0.176123	1372	0.491028	0.990772	-0.293095	0.241427	1416	0.224947	0.966161	0.0717395	0.206167	1386	0.727918	0.999322	0.136469	0.310589	1388	0.66045	0.991747
BMI	rs10197031	2	105454590	C	T	0.0166	1.9e-18	691479	0.3024	-0.0962245	0.285008	1405	0.7357	0.973405	-0.0324822	0.163748	1367	0.842788	0.993871	-0.0208855	0.177825	1372	0.906521	0.996224	-0.254699	0.24505	1416	0.298808	0.966161	-0.072477	0.208465	1386	0.728141	0.999322	-0.103307	0.313775	1388	0.742025	0.991747
BMI	rs16882001	6	90322237	G	A	0.0269	1.5e-11	687690	0.06113	-0.0179189	0.525674	1405	0.972812	0.992802	0.0424247	0.30199	1367	0.888299	0.993871	0.195263	0.327537	1372	0.551172	0.990772	-0.0249805	0.453111	1416	0.956042	0.984679	-0.133574	0.385578	1386	0.729077	0.999322	-0.241684	0.579396	1388	0.676647	0.991747
BMI	rs10975933	9	6954557	G	C	-0.0122	2.7e-11	683622	0.3638	0.15214	0.29196	1405	0.602381	0.94952	0.307586	0.168125	1367	0.0675447	0.943145	0.37518	0.182458	1372	0.0399485	0.92974	0.0251914	0.25051	1416	0.919914	0.984638	0.0737299	0.213523	1386	0.729921	0.999322	0.231889	0.321434	1388	0.470774	0.991747
BMI	rs488029	3	173119378	G	A	-0.0145	5.1e-17	678051	0.4361	0.228287	0.268231	1405	0.394867	0.916639	0.203004	0.154596	1367	0.189365	0.943145	0.0615162	0.168785	1372	0.715568	0.990772	-0.120373	0.230412	1416	0.601458	0.966161	0.0677284	0.196387	1386	0.730243	0.999322	0.0202118	0.296737	1388	0.945705	0.991747
BMI	rs3209570	4	38699657	A	G	-0.0143	9.8e-16	674149	0.3351	-0.207571	0.294779	1405	0.481453	0.916639	0.135844	0.169475	1367	0.422949	0.943145	0.149797	0.184585	1372	0.417202	0.990772	-0.0530846	0.253628	1416	0.834243	0.971957	-0.07414	0.215633	1386	0.731031	0.999322	-0.0941021	0.325982	1388	0.772876	0.991747
BMI	rs4936175	11	132641959	C	T	0.0122	1.4e-12	692569	0.4155	-0.253286	0.265279	1405	0.33985	0.916639	-0.256188	0.153315	1367	0.0949553	0.943145	0.23321	0.166118	1372	0.160582	0.978631	-0.0205974	0.227587	1416	0.9279	0.984638	0.0665994	0.194407	1386	0.731969	0.999322	0.142945	0.292554	1388	0.625196	0.991747
BMI	rs4243045	15	77455914	A	C	-0.011	4.7e-08	691574	0.2864	0.183175	0.334137	1405	0.58364	0.94719	0.0841747	0.192793	1367	0.662467	0.968423	0.145817	0.209349	1372	0.486219	0.990772	-0.399541	0.286805	1416	0.163818	0.966161	-0.0832942	0.24471	1386	0.733623	0.999322	-0.375313	0.368347	1388	0.308424	0.991747
BMI	rs1485038	4	94409429	C	T	-0.0143	7.4e-11	683869	0.1979	0.457467	0.34632	1405	0.186739	0.916639	-0.0830142	0.20012	1367	0.678338	0.972051	-0.293234	0.216111	1372	0.175049	0.978631	0.161028	0.297335	1416	0.588199	0.966161	0.0860461	0.253911	1386	0.73475	0.999322	0.128985	0.381087	1388	0.735064	0.991747
BMI	rs645482	1	191386639	G	A	-0.0109	6.2e-09	688815	0.348	0.0841995	0.308872	1405	0.785198	0.973405	0.349413	0.177518	1367	0.0492356	0.943145	0.0897277	0.193708	1372	0.643288	0.990772	0.175817	0.265276	1416	0.507586	0.966161	0.0763035	0.225956	1386	0.735647	0.999322	0.512484	0.341241	1388	0.133372	0.991747
BMI	rs326889	4	112713436	T	C	-0.0129	2.4e-13	688030	0.4686	0.520606	0.27131	1405	0.0552063	0.875461	-0.100199	0.156399	1367	0.521848	0.943145	-0.211369	0.169673	1372	0.213072	0.978631	0.0971912	0.233145	1416	0.676837	0.966161	-0.0665584	0.198408	1386	0.737328	0.999322	-0.226495	0.297894	1388	0.447192	0.991747
BMI	rs12044597	1	1708801	G	A	0.0143	1.7e-18	789125	0.451	-0.119787	0.283295	1405	0.672481	0.965048	0.060201	0.163164	1367	0.712215	0.973578	0.0335752	0.17735	1372	0.849874	0.990772	-0.317809	0.243262	1416	0.191614	0.966161	0.0692058	0.20723	1386	0.738463	0.999322	0.177718	0.312959	1388	0.570221	0.991747
BMI	rs6606686	12	110903380	G	C	0.0136	7.6e-15	795209	0.3225	-0.431567	0.299214	1405	0.149432	0.916639	0.500678	0.172124	1367	0.00368718	0.644967	0.417628	0.187543	1372	0.0261212	0.92974	-0.477874	0.256581	1416	0.0627454	0.966161	0.0728031	0.218473	1386	0.739007	0.999322	-0.264893	0.33073	1388	0.423309	0.991747
BMI	rs7727781	5	165185571	C	T	-0.0097	1.9e-08	683127	0.4931	-0.193754	0.262309	1405	0.460246	0.916639	-0.414202	0.149892	1367	0.00579913	0.644967	-0.168672	0.16407	1372	0.304112	0.978631	-0.148412	0.22542	1416	0.510402	0.966161	0.0629875	0.191302	1386	0.742012	0.999322	-0.212379	0.289466	1388	0.463262	0.991747
BMI	rs6574695	14	82506639	G	C	0.0146	1.6e-08	680356	0.1929	0.383515	0.338113	1405	0.256872	0.916639	-0.164894	0.194346	1367	0.396334	0.943145	0.345346	0.213139	1372	0.105403	0.978631	0.0488235	0.290786	1416	0.866685	0.979034	0.0808971	0.247299	1386	0.743625	0.999322	-0.211385	0.376473	1388	0.574557	0.991747
BMI	rs7947143	11	64090422	A	G	-0.018	2.4e-14	690463	0.1324	0.680645	0.402193	1405	0.0908054	0.875461	0.208604	0.232632	1367	0.370033	0.943145	0.0141803	0.252403	1372	0.955206	0.996224	0.159889	0.345487	1416	0.643585	0.966161	-0.0962851	0.29519	1386	0.744338	0.999322	-0.433417	0.444491	1388	0.329689	0.991747
BMI	rs1704190	2	200760629	G	A	-0.0098	3.3e-08	692593	0.322	-0.0074865	0.276603	1405	0.978411	0.994282	-0.141805	0.158746	1367	0.371866	0.943145	-0.132219	0.17306	1372	0.444998	0.990772	0.151665	0.237356	1416	0.522941	0.966161	0.0654216	0.201318	1386	0.745256	0.999322	-0.242401	0.304101	1388	0.425525	0.991747
BMI	rs11538	22	18220831	G	A	0.0135	3.3e-09	692349	0.1425	0.270977	0.372661	1405	0.467261	0.916639	-0.0124565	0.213998	1367	0.953591	0.997005	0.520349	0.233925	1372	0.026284	0.92974	-0.170276	0.32049	1416	0.595295	0.966161	-0.0885038	0.272595	1386	0.745479	0.999322	-0.136382	0.41202	1388	0.740688	0.991747
BMI	rs7243357	18	56883319	G	T	-0.0194	9.1e-20	791550	0.1824	0.291054	0.325232	1405	0.370988	0.916639	-0.154421	0.187021	1367	0.409127	0.943145	-0.0753489	0.203417	1372	0.711131	0.990772	-0.188611	0.278556	1416	0.498453	0.966161	0.0769038	0.236993	1386	0.745611	0.999322	-0.179635	0.357569	1388	0.615481	0.991747
BMI	rs16833232	3	182262873	T	C	-0.0109	4.6e-09	688579	0.3027	-0.655718	0.307426	1405	0.033105	0.822107	0.14866	0.17796	1367	0.403664	0.943145	0.0824181	0.192487	1372	0.668592	0.990772	-0.483013	0.264532	1416	0.0680749	0.966161	0.0732674	0.226443	1386	0.746322	0.999322	-0.162303	0.340094	1388	0.633275	0.991747
BMI	rs3819811	6	144280529	A	G	-0.0103	3.1e-08	682154	0.3565	0.466179	0.273558	1405	0.0885794	0.875461	-0.236837	0.15786	1367	0.13377	0.943145	0.0022854	0.171409	1372	0.989364	0.998297	0.247341	0.234068	1416	0.290828	0.966161	0.0632562	0.199347	1386	0.751051	0.999322	0.423165	0.300348	1388	0.159086	0.991747
BMI	rs349088	11	84814393	A	C	-0.0128	1.8e-13	684401	0.483	0.144928	0.278164	1405	0.602437	0.94952	-0.133999	0.159827	1367	0.401956	0.943145	-0.283717	0.174237	1372	0.103684	0.978631	-0.207533	0.238429	1416	0.384219	0.966161	0.064389	0.203007	1386	0.751158	0.999322	0.045905	0.306327	1388	0.8809	0.991747
BMI	rs13072731	3	38533335	A	C	-0.0105	2.3e-09	691645	0.4663	-0.0758852	0.261268	1405	0.771515	0.973405	0.250587	0.150617	1367	0.0963979	0.943145	0.0169194	0.163423	1372	0.917556	0.996224	-0.0889858	0.224547	1416	0.691951	0.966161	-0.0607726	0.192022	1386	0.75168	0.999322	-0.345087	0.288167	1388	0.231308	0.991747
BMI	rs1876359	16	4930100	T	C	0.013	1.5e-14	792860	0.3759	0.339866	0.268047	1405	0.205035	0.916639	0.052567	0.153988	1367	0.732877	0.982546	0.100267	0.167647	1372	0.549883	0.990772	0.0676966	0.230368	1416	0.768906	0.966161	-0.061765	0.195874	1386	0.752558	0.999322	-0.0357877	0.295732	1388	0.903697	0.991747
BMI	rs1000940	17	5283252	G	A	0.0154	1.1e-17	794558	0.3057	-0.176119	0.278082	1405	0.526619	0.923132	0.110747	0.159831	1367	0.488492	0.943145	0.166057	0.17321	1372	0.337877	0.978631	0.0821761	0.238806	1416	0.730813	0.966161	0.0634868	0.203349	1386	0.754931	0.999322	-0.1544	0.305517	1388	0.613378	0.991747
BMI	rs731834	2	113957198	C	A	-0.0107	1.6e-09	625481	0.4493	0.0137247	0.276622	1405	0.960436	0.992802	0.0149163	0.159288	1367	0.925406	0.996762	0.0244449	0.172684	1372	0.88745	0.996224	-0.0799721	0.237522	1416	0.736398	0.966161	0.062818	0.202075	1386	0.755951	0.999322	-0.108017	0.304437	1388	0.722786	0.991747
BMI	rs1106090	2	58068741	G	A	0.0127	4.1e-14	786305	0.4199	-0.531947	0.278763	1405	0.0565659	0.875461	0.0172092	0.161272	1367	0.915035	0.993871	-0.0478159	0.175609	1372	0.785443	0.990772	-0.131058	0.239603	1416	0.584479	0.966161	-0.0635946	0.204694	1386	0.75609	0.999322	-0.190343	0.309023	1388	0.538028	0.991747
BMI	rs9527958	13	59841918	G	A	0.0102	2.5e-08	691019	0.2965	-0.225169	0.288853	1405	0.4358	0.916639	-0.169188	0.166241	1367	0.308991	0.943145	-0.0754025	0.180891	1372	0.676862	0.990772	0.0517823	0.24851	1416	0.83497	0.971957	-0.0655474	0.212096	1386	0.757334	0.999322	-0.106085	0.319684	1388	0.740059	0.991747
BMI	rs7628129	3	85095897	C	T	0.0154	5.3e-19	683300	0.4376	0.552139	0.271967	1405	0.0425292	0.869587	-0.182064	0.156197	1367	0.243978	0.943145	0.142365	0.170789	1372	0.40467	0.984915	0.0712142	0.234561	1416	0.761473	0.966161	0.0612959	0.198903	1386	0.758	0.999322	-0.152333	0.30106	1388	0.612945	0.991747
BMI	rs17599948	17	41353410	G	A	-0.013	4.6e-09	781803	0.1662	0.0416738	0.36964	1405	0.910252	0.98481	-0.141975	0.213451	1367	0.506074	0.943145	-0.0828886	0.233115	1372	0.722218	0.990772	-0.406303	0.317556	1416	0.200944	0.966161	-0.0834497	0.271659	1386	0.758749	0.999322	-0.653379	0.410445	1388	0.111641	0.991747
BMI	rs732594	6	35206553	C	A	0.018	1e-24	673045	0.4763	-0.050849	0.302723	1405	0.86663	0.983207	0.233431	0.173793	1367	0.179446	0.943145	0.170244	0.188794	1372	0.367355	0.984915	0.0565826	0.259854	1416	0.827657	0.96912	-0.06771	0.220799	1386	0.75915	0.999322	-0.352471	0.33282	1388	0.289766	0.991747
BMI	rs6595205	5	119372533	C	G	0.0114	2e-12	794525	0.4376	0.234897	0.259465	1405	0.365457	0.916639	-0.0078374	0.149315	1367	0.958147	0.997005	0.225111	0.162532	1372	0.166272	0.978631	-0.0455082	0.223416	1416	0.838623	0.973012	0.0582924	0.190098	1386	0.75916	0.999322	-0.251005	0.286994	1388	0.381944	0.991747
BMI	rs9845966	3	13433158	T	G	0.0105	2.5e-10	778076	0.447	-0.0522938	0.288507	1405	0.856193	0.981618	-0.194454	0.166181	1367	0.242152	0.943145	-0.176313	0.180385	1372	0.328533	0.978631	-0.122637	0.247699	1416	0.620604	0.966161	0.0646003	0.211002	1386	0.75953	0.999322	0.0512159	0.318099	1388	0.872112	0.991747
BMI	rs11784576	8	25661397	T	G	0.0109	5.9e-09	690143	0.2651	-0.122361	0.292356	1405	0.675621	0.965048	0.102856	0.168684	1367	0.542128	0.943145	0.00327335	0.182677	1372	0.985706	0.997535	-0.236928	0.251391	1416	0.346116	0.966161	-0.0654375	0.214713	1386	0.76059	0.999322	0.25448	0.322281	1388	0.429884	0.991747
BMI	rs934515	2	79482643	A	G	0.0185	7.6e-12	686026	0.1453	0.0587843	0.383062	1405	0.878059	0.98481	0.298344	0.220896	1367	0.177047	0.943145	0.223471	0.240648	1372	0.353252	0.984915	-0.398485	0.327994	1416	0.224604	0.966161	0.0848569	0.280666	1386	0.762438	0.999322	0.0349882	0.422971	1388	0.934086	0.991747
BMI	rs17424278	1	57846394	C	A	0.017	1.9e-09	680073	0.09251	0.0159636	0.46566	1405	0.972657	0.992802	0.280159	0.265828	1367	0.292111	0.943145	0.209344	0.291167	1372	0.472275	0.990772	-0.129346	0.398761	1416	0.745708	0.966161	0.100867	0.337992	1386	0.76542	0.999322	-0.213493	0.511203	1388	0.676283	0.991747
BMI	rs2365389	3	61236462	C	T	0.0174	1.3e-25	783625	0.4979	0.256563	0.270369	1405	0.342816	0.916639	0.144701	0.155151	1367	0.351167	0.943145	-0.069862	0.168421	1372	0.67835	0.990772	0.194459	0.232279	1416	0.402634	0.966161	-0.058353	0.197452	1386	0.767634	0.999322	0.302324	0.297045	1388	0.308964	0.991747
BMI	rs12609744	19	12994140	C	T	0.0126	3.6e-11	691253	0.3339	-0.458886	0.275356	1405	0.0958351	0.875461	0.083734	0.158417	1367	0.597193	0.952555	0.252078	0.172377	1372	0.143872	0.978631	-0.190497	0.236493	1416	0.420663	0.966161	0.0593873	0.201247	1386	0.767965	0.999322	-0.302759	0.303352	1388	0.318433	0.991747
BMI	rs7919	16	70514828	A	C	-0.0158	1e-19	685991	0.481	-0.448897	0.287822	1405	0.119073	0.87976	-0.0690068	0.165746	1367	0.677227	0.972051	0.0422704	0.18086	1372	0.815238	0.990772	-0.370512	0.247325	1416	0.134338	0.966161	0.0618329	0.210805	1386	0.769323	0.999322	-0.354206	0.318214	1388	0.265858	0.991747
BMI	rs11945861	4	65700865	A	G	-0.0148	5e-13	682451	0.2395	-0.0081222	0.339835	1405	0.980935	0.994282	-0.0119101	0.195745	1367	0.951492	0.997005	0.202394	0.212811	1372	0.341748	0.978631	-0.115928	0.291522	1416	0.690939	0.966161	0.0719406	0.248654	1386	0.77238	0.999322	0.262976	0.374127	1388	0.482233	0.991747
BMI	rs11251352	10	2585792	A	G	-0.0109	7e-10	690804	0.4711	0.0007379	0.261635	1405	0.99775	0.99775	-0.159174	0.150589	1367	0.290695	0.943145	0.0379123	0.164071	1372	0.817293	0.990772	0.210424	0.225075	1416	0.349998	0.966161	0.0553923	0.191932	1386	0.772928	0.999322	0.0931088	0.289703	1388	0.74796	0.991747
BMI	rs10510419	3	12426936	T	G	-0.0177	2.2e-14	789318	0.1682	0.315951	0.352796	1405	0.370641	0.916639	-0.203989	0.202885	1367	0.314865	0.943145	0.0902988	0.220242	1372	0.681872	0.990772	-0.0108645	0.30331	1416	0.971431	0.985462	0.0741488	0.257475	1386	0.773402	0.999322	-0.481896	0.38843	1388	0.214956	0.991747
BMI	rs9294260	6	83433228	G	A	-0.0147	1.8e-19	783533	0.4778	0.243494	0.276738	1405	0.379081	0.916639	-0.0852595	0.159572	1367	0.59322	0.952555	-0.089953	0.172689	1372	0.602525	0.990772	0.0396503	0.237314	1416	0.867332	0.979034	0.0580666	0.202479	1386	0.774325	0.999322	-0.246587	0.303628	1388	0.416855	0.991747
BMI	rs10818938	9	127049237	A	G	0.0114	5.1e-11	691410	0.4094	0.121752	0.270194	1405	0.652341	0.963954	-0.0050239	0.155418	1367	0.974217	0.997005	-0.240599	0.168886	1372	0.154496	0.978631	0.456928	0.231268	1416	0.0483785	0.966161	0.0562903	0.197328	1386	0.775486	0.999322	0.092964	0.297736	1388	0.754908	0.991747
BMI	rs905938	1	154991389	C	T	0.0149	1.2e-15	795227	0.2489	0.213102	0.307313	1405	0.488151	0.916639	-0.279846	0.176267	1367	0.112606	0.943145	-0.399427	0.192701	1372	0.0383809	0.92974	0.038342	0.263403	1416	0.884286	0.982786	-0.0635064	0.223656	1386	0.776494	0.999322	-0.128065	0.338285	1388	0.705063	0.991747
BMI	rs2605603	11	93221105	G	A	0.0103	2.5e-10	790857	0.4876	0.240899	0.262165	1405	0.358316	0.916639	0.0230866	0.150645	1367	0.878223	0.993871	-0.0340235	0.164017	1372	0.835699	0.990772	0.252751	0.225042	1416	0.261574	0.966161	0.0544071	0.191743	1386	0.776644	0.999322	-0.166382	0.289068	1388	0.564993	0.991747
BMI	rs8070454	17	38160754	T	C	-0.0098	4.2e-09	795617	0.3604	0.225204	0.265447	1405	0.396363	0.916639	-0.0264994	0.153132	1367	0.862638	0.993871	-0.268891	0.165904	1372	0.105301	0.978631	0.257983	0.227853	1416	0.25773	0.966161	-0.0551775	0.194851	1386	0.777083	0.999322	0.254434	0.29216	1388	0.383977	0.991747
BMI	rs9364687	6	163817911	T	G	-0.0106	1.9e-10	790296	0.34	-0.0150642	0.294314	1405	0.959186	0.992802	0.0997277	0.168784	1367	0.554713	0.952555	-0.0063515	0.183442	1372	0.972385	0.997535	0.0775022	0.253016	1416	0.759412	0.966161	0.060728	0.215102	1386	0.777739	0.999322	-0.141525	0.323997	1388	0.662317	0.991747
BMI	rs1899898	8	93240419	C	T	-0.0113	6.8e-10	692601	0.2818	0.32659	0.325381	1405	0.315689	0.916639	-0.0248005	0.187812	1367	0.894965	0.993871	-0.0234769	0.204193	1372	0.908483	0.996224	0.523735	0.278844	1416	0.0605556	0.966161	-0.06692	0.238485	1386	0.779056	0.999322	0.330812	0.359586	1388	0.357745	0.991747
BMI	rs2322622	13	60497331	C	T	0.0094	2.7e-08	790422	0.3563	-0.49828	0.279936	1405	0.0752982	0.875461	0.0519597	0.161082	1367	0.747074	0.982546	-0.190418	0.17591	1372	0.279236	0.978631	-0.260324	0.241107	1416	0.28046	0.966161	-0.0562554	0.204729	1386	0.783527	0.999322	-0.186476	0.310353	1388	0.548037	0.991747
BMI	rs1787267	18	76742544	C	G	-0.0237	3.4e-11	692092	0.07176	-0.68711	0.494609	1405	0.164994	0.916639	0.261193	0.283933	1367	0.357783	0.943145	-0.0064408	0.30872	1372	0.983358	0.997535	-0.965349	0.425436	1416	0.0234146	0.966161	0.0990534	0.362403	1386	0.784645	0.999322	0.217386	0.546608	1388	0.690914	0.991747
BMI	rs12454712	18	60845884	C	T	0.0144	4.4e-16	715252	0.3424	0.00354694	0.266266	1405	0.989374	0.995568	0.15933	0.153165	1367	0.298409	0.943145	-0.0218291	0.16672	1372	0.895848	0.996224	0.350818	0.228684	1416	0.125236	0.966161	-0.0519025	0.194802	1386	0.789943	0.999322	-0.103308	0.293868	1388	0.725233	0.991747
BMI	rs1330052	13	86536006	G	C	0.0132	1.5e-13	691613	0.3504	0.372382	0.290582	1405	0.200231	0.916639	0.108125	0.167178	1367	0.517893	0.943145	-0.230476	0.181968	1372	0.205524	0.978631	0.177996	0.24995	1416	0.476506	0.966161	0.0557949	0.212804	1386	0.793215	0.999322	-0.266513	0.321385	1388	0.407099	0.991747
BMI	rs2281997	9	34521867	T	C	0.0102	4.6e-08	684503	0.3068	-0.262874	0.295877	1405	0.374448	0.916639	0.1683	0.170425	1367	0.323559	0.943145	-0.0567141	0.185197	1372	0.759472	0.990772	-0.0178902	0.253795	1416	0.943813	0.984638	-0.0565743	0.216741	1386	0.794114	0.999322	0.0803548	0.325505	1388	0.805052	0.991747
BMI	rs11614340	12	133426483	C	T	0.0133	8.5e-13	692325	0.2254	-0.189736	0.327531	1405	0.562485	0.936688	0.140088	0.188606	1367	0.457761	0.943145	0.252073	0.204969	1372	0.218981	0.978631	-0.403838	0.281588	1416	0.151753	0.966161	-0.0622572	0.239399	1386	0.794859	0.999322	-0.541812	0.361725	1388	0.134399	0.991747
BMI	rs2425840	20	44904838	C	A	0.0119	1.6e-11	681680	0.3544	0.186479	0.274355	1405	0.496807	0.916639	-0.0167562	0.157789	1367	0.915444	0.993871	0.108779	0.171435	1372	0.525846	0.990772	0.492145	0.235315	1416	0.0366688	0.966161	0.0521225	0.200449	1386	0.794881	0.999322	-0.307296	0.30209	1388	0.309221	0.991747
BMI	rs11672660	19	46180184	T	C	-0.034	1.7e-60	768426	0.1801	-0.208925	0.342309	1405	0.541736	0.933164	-0.0750917	0.195764	1367	0.701348	0.97304	-0.130627	0.213743	1372	0.541209	0.990772	-0.160873	0.293394	1416	0.58356	0.966161	0.0642904	0.248547	1386	0.795932	0.999322	0.0945665	0.376174	1388	0.80155	0.991747
BMI	rs11128760	3	15873407	A	G	0.011	3.1e-10	690962	0.4683	-0.18592	0.267069	1405	0.486452	0.916639	-0.276068	0.153391	1367	0.0721202	0.943145	-0.0288451	0.166924	1372	0.862831	0.992755	-0.0324546	0.229438	1416	0.887533	0.982786	0.0499268	0.195335	1386	0.798301	0.999322	0.472597	0.294055	1388	0.108246	0.991747
BMI	rs1608445	18	947954	A	G	-0.0104	3.7e-09	683383	0.4786	-0.0484313	0.283193	1405	0.864234	0.981735	-0.21108	0.162304	1367	0.193643	0.943145	-0.255643	0.177759	1372	0.150623	0.978631	0.144429	0.243633	1416	0.5534	0.966161	-0.052505	0.207087	1386	0.799889	0.999322	0.380846	0.313737	1388	0.224992	0.991747
BMI	rs4834272	4	113313986	C	T	0.0115	3.3e-11	791609	0.3552	0.220934	0.27466	1405	0.421308	0.916639	-0.0903498	0.158321	1367	0.568315	0.952555	-0.217973	0.171301	1372	0.203427	0.978631	0.327037	0.236392	1416	0.166746	0.966161	-0.0511548	0.20189	1386	0.800013	0.999322	-0.0543816	0.303238	1388	0.8577	0.991747
BMI	rs4889606	16	31011183	G	A	-0.0202	2.8e-33	788888	0.3763	0.0181141	0.27689	1405	0.947849	0.989927	0.058867	0.159355	1367	0.711881	0.973578	0.0652442	0.173702	1372	0.707266	0.990772	-0.0403131	0.237745	1416	0.865377	0.979034	0.0511287	0.20254	1386	0.800741	0.999322	-0.382288	0.306014	1388	0.211786	0.991747
BMI	rs10989568	9	104396304	A	G	0.0107	6.6e-10	688508	0.4694	-0.293029	0.260041	1405	0.259997	0.916639	-0.127344	0.149457	1367	0.394341	0.943145	-0.170766	0.163479	1372	0.296403	0.978631	-0.172558	0.223508	1416	0.440219	0.966161	-0.0476811	0.190064	1386	0.801953	0.999322	-0.0480386	0.288209	1388	0.867647	0.991747
BMI	rs9650755	9	96484342	G	A	0.0154	2.8e-15	691183	0.261	0.129682	0.297725	1405	0.663212	0.965048	-0.012491	0.171426	1367	0.941924	0.997005	0.130771	0.186675	1372	0.483718	0.990772	0.23981	0.255424	1416	0.347959	0.966161	-0.0544076	0.217703	1386	0.802689	0.999322	0.0963888	0.328642	1388	0.769342	0.991747
BMI	rs12682412	8	68207909	A	G	0.0105	3.9e-08	692319	0.2834	-0.302982	0.296478	1405	0.306986	0.916639	0.042493	0.170563	1367	0.803295	0.992591	-0.0215875	0.185611	1372	0.907428	0.996224	0.0821466	0.254951	1416	0.747344	0.966161	-0.05401	0.216839	1386	0.803337	0.999322	-0.241137	0.327443	1388	0.461598	0.991747
BMI	rs11739877	5	105876806	C	T	-0.0117	6.6e-11	692540	0.3902	-0.0600289	0.273028	1405	0.826009	0.976099	-0.147005	0.157399	1367	0.35049	0.943145	-0.0765685	0.169955	1372	0.652405	0.990772	0.00097474	0.234532	1416	0.996685	0.996685	0.0492253	0.200119	1386	0.805734	0.999322	0.0874194	0.299988	1388	0.770782	0.991747
BMI	rs16839578	2	156629693	T	C	-0.0109	1.8e-09	692082	0.3176	-0.263855	0.274546	1405	0.33669	0.916639	0.0325635	0.157986	1367	0.836731	0.993871	0.112011	0.172022	1372	0.515063	0.990772	-0.27457	0.23597	1416	0.244792	0.966161	-0.049339	0.201036	1386	0.806165	0.999322	0.180657	0.303827	1388	0.552205	0.991747
BMI	rs11753081	6	20705590	G	T	-0.0138	8.9e-11	790084	0.2043	0.382999	0.31427	1405	0.223166	0.916639	-0.281764	0.182596	1367	0.12304	0.943145	-0.0161184	0.197462	1372	0.934954	0.996224	0.311166	0.270323	1416	0.249892	0.966161	0.0568401	0.231605	1386	0.806169	0.999322	0.359554	0.347834	1388	0.30146	0.991747
BMI	rs1158805	18	40736590	A	C	-0.0137	1.2e-14	691776	0.3972	-0.0668418	0.284696	1405	0.814412	0.975217	0.0171054	0.162731	1367	0.9163	0.993871	-0.197096	0.177897	1372	0.268091	0.978631	-0.139399	0.243887	1416	0.567704	0.966161	0.0502413	0.206804	1386	0.808087	0.999322	-0.0130359	0.31349	1388	0.966837	0.991747
BMI	rs1075901	17	15943910	T	C	-0.0121	1.2e-13	794789	0.4227	-0.298968	0.274133	1405	0.275639	0.916639	-0.033149	0.157928	1367	0.833778	0.993871	0.103725	0.171771	1372	0.54604	0.990772	-0.356404	0.235244	1416	0.129987	0.966161	0.0484382	0.200496	1386	0.809133	0.999322	-0.198019	0.30295	1388	0.513455	0.991747
BMI	rs156400	18	23178900	A	C	-0.0098	1.5e-08	684065	0.4835	-0.0647029	0.260268	1405	0.803706	0.973742	-0.19478	0.149064	1367	0.19154	0.943145	-0.0296631	0.162443	1372	0.855134	0.990772	0.20242	0.223356	1416	0.364949	0.966161	0.0456137	0.189761	1386	0.810076	0.999322	0.0701616	0.286109	1388	0.806317	0.991747
BMI	rs12964689	18	21116998	G	A	-0.0203	5.1e-32	692097	0.4935	-0.0791394	0.262222	1405	0.762847	0.973405	0.104312	0.150593	1367	0.488633	0.943145	0.0357726	0.16446	1372	0.827839	0.990772	-0.0507114	0.224575	1416	0.821382	0.96912	-0.0454724	0.190792	1386	0.811657	0.999322	-0.0769031	0.289145	1388	0.790304	0.991747
BMI	rs236527	17	68215574	G	C	0.0107	2.9e-08	676956	0.3439	0.233453	0.273574	1405	0.393615	0.916639	-0.300549	0.15687	1367	0.055588	0.943145	-0.168261	0.171031	1372	0.325388	0.978631	0.19959	0.235357	1416	0.396565	0.966161	0.0476721	0.200388	1386	0.811995	0.999322	0.147121	0.30242	1388	0.626704	0.991747
BMI	rs1365466	18	36182440	C	T	0.0137	3.3e-13	791868	0.3405	-0.135378	0.293181	1405	0.64433	0.959084	-0.0733084	0.169057	1367	0.664625	0.968423	-0.0404185	0.183338	1372	0.825547	0.990772	-0.465275	0.251013	1416	0.0640078	0.966161	-0.0510552	0.214789	1386	0.81215	0.999322	-0.0375291	0.322547	1388	0.90739	0.991747
BMI	rs17100323	5	142862611	C	G	0.01	1.5e-08	674502	0.3975	0.209159	0.273916	1405	0.445242	0.916639	-0.0844605	0.157055	1367	0.59082	0.952555	0.0338244	0.171922	1372	0.844058	0.990772	-0.0227675	0.235112	1416	0.92287	0.984638	-0.0473513	0.199465	1386	0.812389	0.999322	0.247069	0.302332	1388	0.41395	0.991747
BMI	rs946526	1	46487168	T	C	-0.0314	1.7e-13	674813	0.02517	-0.44558	0.923215	1405	0.629428	0.955363	-0.103405	0.523938	1367	0.843574	0.993871	-0.181287	0.571392	1372	0.751085	0.990772	-0.236808	0.795499	1416	0.765988	0.966161	0.158378	0.670392	1386	0.813277	0.999322	0.13564	1.01263	1388	0.893463	0.991747
BMI	rs4523552	1	98328093	T	C	0.0137	4e-11	687770	0.1983	0.436475	0.326742	1405	0.18182	0.916639	-0.324044	0.187872	1367	0.0847901	0.943145	-0.271464	0.20411	1372	0.183745	0.978631	-0.0350132	0.280579	1416	0.900708	0.984638	0.0563311	0.238955	1386	0.81367	0.999322	-0.625227	0.358798	1388	0.0816344	0.991747
BMI	rs13298062	9	13941513	G	A	-0.0137	3.8e-10	689794	0.1535	-0.0879304	0.372961	1405	0.813651	0.975217	0.167955	0.213464	1367	0.431533	0.943145	0.162822	0.23338	1372	0.485504	0.990772	-0.0475995	0.320861	1416	0.882089	0.982786	-0.0636335	0.272158	1386	0.815166	0.999322	0.263448	0.412182	1388	0.522829	0.991747
BMI	rs7488867	12	103699685	T	C	-0.0204	8.4e-24	635746	0.2988	0.470667	0.294013	1405	0.109639	0.875461	-0.0860565	0.169278	1367	0.611275	0.952555	0.0282286	0.183869	1372	0.878007	0.993592	0.332897	0.252267	1416	0.187177	0.966161	0.0500656	0.214504	1386	0.815484	0.999322	-0.0779556	0.323061	1388	0.809356	0.991747
BMI	rs2491864	1	242986063	A	G	0.0137	7.3e-11	690625	0.2419	-0.501789	0.309369	1405	0.105035	0.875461	0.180119	0.178744	1367	0.313782	0.943145	0.190069	0.193693	1372	0.326625	0.978631	0.07274	0.266514	1416	0.784947	0.966161	0.0526144	0.227524	1386	0.817157	0.999322	0.135594	0.341278	1388	0.691199	0.991747
BMI	rs1454687	3	94038085	G	C	-0.0202	5.2e-32	692324	0.4647	-0.212412	0.26937	1405	0.430507	0.916639	-0.432683	0.155152	1367	0.00536505	0.644967	-0.152457	0.168691	1372	0.366279	0.984915	0.249531	0.23149	1416	0.281249	0.966161	-0.0449222	0.197272	1386	0.8199	0.999322	-0.227195	0.296977	1388	0.444387	0.991747
BMI	rs7120873	11	49459474	T	C	0.0172	3.4e-10	691850	0.1702	-0.0679973	0.376279	1405	0.856622	0.981618	-0.292172	0.215336	1367	0.175064	0.943145	-0.369611	0.234939	1372	0.115901	0.978631	0.293242	0.322178	1416	0.36288	0.966161	0.0602923	0.273312	1386	0.825437	0.999322	-0.0649011	0.413484	1388	0.875298	0.991747
BMI	rs7235205	18	63373762	G	A	0.0141	4.4e-14	789016	0.3285	-0.228871	0.291439	1405	0.432404	0.916639	0.234757	0.167376	1367	0.160974	0.943145	-0.097894	0.181728	1372	0.590194	0.990772	-0.268058	0.250376	1416	0.284523	0.966161	0.0470129	0.213225	1386	0.825526	0.999322	0.326839	0.320588	1388	0.308145	0.991747
BMI	rs13107325	4	103188709	T	C	0.047	1.1e-47	792045	0.07061	0.343764	0.495406	1405	0.487858	0.916639	0.403999	0.285138	1367	0.156756	0.943145	0.103924	0.309402	1372	0.737009	0.990772	0.499854	0.426122	1416	0.240983	0.966161	-0.07912	0.361821	1386	0.826939	0.999322	0.253159	0.547413	1388	0.643821	0.991747
BMI	rs4722672	7	27231762	C	T	0.0151	1.8e-12	784309	0.2256	-0.179705	0.319677	1405	0.574107	0.94719	0.115596	0.184257	1367	0.530528	0.943145	0.0905316	0.199831	1372	0.650592	0.990772	-0.0169822	0.274134	1416	0.950613	0.984638	0.0510042	0.234074	1386	0.827541	0.999322	-0.171365	0.351756	1388	0.626214	0.991747
BMI	rs2837398	21	41427168	C	A	0.0114	1.1e-10	680214	0.4219	0.0290511	0.264613	1405	0.912594	0.98481	0.00525075	0.15222	1367	0.972488	0.997005	-0.0455576	0.166395	1372	0.784286	0.990772	-0.0827083	0.22743	1416	0.716163	0.966161	-0.0421824	0.193622	1386	0.827571	0.999322	0.290905	0.293391	1388	0.321604	0.991747
BMI	rs7084454	10	21821274	A	G	0.0193	4e-25	678564	0.3274	-0.125223	0.27242	1405	0.645826	0.959084	0.176202	0.156084	1367	0.259142	0.943145	0.158905	0.170348	1372	0.351076	0.984915	-0.237701	0.234019	1416	0.309932	0.966161	0.0430785	0.198688	1386	0.828385	0.999322	0.22861	0.300577	1388	0.447045	0.991747
BMI	rs8123881	20	15819495	G	A	0.0196	4.4e-16	793018	0.1528	-0.273319	0.358772	1405	0.446297	0.916639	0.00363511	0.206601	1367	0.985965	0.997005	-0.225143	0.224616	1372	0.316355	0.978631	0.114968	0.308084	1416	0.709079	0.966161	0.0549761	0.262265	1386	0.833995	0.999322	0.151729	0.395099	1388	0.701018	0.991747
BMI	rs7323827	13	94116675	G	A	-0.0102	3.3e-08	689566	0.2712	0.511697	0.29342	1405	0.0813961	0.875461	-0.422868	0.168066	1367	0.0119817	0.730181	-0.407909	0.183461	1372	0.0263522	0.92974	0.351333	0.252727	1416	0.164698	0.966161	0.044251	0.214892	1386	0.836882	0.999322	-0.298487	0.324299	1388	0.357522	0.991747
BMI	rs4759075	12	54667285	C	T	-0.0112	1.4e-11	795195	0.4456	-0.0498573	0.270072	1405	0.853564	0.981618	-0.06074	0.155654	1367	0.696432	0.97304	0.0448688	0.169546	1372	0.791326	0.990772	-0.112849	0.232504	1416	0.627494	0.966161	-0.0405724	0.198438	1386	0.838026	0.999322	-0.231914	0.299061	1388	0.438192	0.991747
BMI	rs16906845	8	138215228	A	G	-0.0225	2.2e-09	692124	0.0863	0.393843	0.449136	1405	0.380698	0.916639	-0.257691	0.257561	1367	0.317245	0.943145	0.31532	0.281652	1372	0.263109	0.978631	-0.359579	0.386581	1416	0.352452	0.966161	-0.066907	0.327928	1386	0.838361	0.999322	-0.268252	0.497307	1388	0.589692	0.991747
BMI	rs10483389	14	30495719	T	C	0.0342	4.5e-16	782081	0.0711	-0.3534	0.549085	1405	0.51993	0.920431	-0.058754	0.314729	1367	0.851938	0.993871	-0.311499	0.341388	1372	0.361694	0.984915	-0.460488	0.469926	1416	0.327296	0.966161	-0.0810167	0.399916	1386	0.83949	0.999322	-0.200176	0.600937	1388	0.739105	0.991747
BMI	rs1528435	2	181550962	C	T	-0.0164	9.1e-23	794198	0.3658	-0.0994753	0.264453	1405	0.706859	0.973405	-0.0483194	0.15204	1367	0.75068	0.982546	0.230539	0.165068	1372	0.162753	0.978631	-0.0631592	0.227743	1416	0.78157	0.966161	-0.0391694	0.193719	1386	0.839793	0.999322	-0.172699	0.291457	1388	0.553588	0.991747
BMI	rs4717623	7	71434369	T	C	-0.0135	4.2e-12	692442	0.3624	-0.306629	0.278633	1405	0.271314	0.916639	-0.083052	0.160255	1367	0.60437	0.952555	-0.0191355	0.174812	1372	0.912851	0.996224	-0.275705	0.238779	1416	0.248431	0.966161	-0.0408263	0.203511	1386	0.841033	0.999322	-0.278291	0.307411	1388	0.365478	0.991747
BMI	rs7760082	6	21919387	G	A	0.0122	2.9e-11	690649	0.3893	0.195681	0.266966	1405	0.463693	0.916639	-0.0883783	0.153696	1367	0.565372	0.952555	-0.179148	0.167347	1372	0.284578	0.978631	-0.131167	0.229684	1416	0.568039	0.966161	0.0391702	0.19566	1386	0.841358	0.999322	-0.0985482	0.295504	1388	0.738814	0.991747
BMI	rs2631681	10	93032943	T	C	-0.0113	8.9e-11	789736	0.3656	0.203888	0.301088	1405	0.498411	0.916639	-0.0683414	0.172927	1367	0.692755	0.97304	0.0301496	0.187927	1372	0.872564	0.993096	0.0979634	0.258369	1416	0.704626	0.966161	-0.0436645	0.219767	1386	0.842538	0.999322	-0.560758	0.330306	1388	0.0897917	0.991747
BMI	rs8192675	3	170724883	C	T	0.0152	1.4e-17	795515	0.3501	0.395026	0.291564	1405	0.175685	0.916639	-0.13635	0.167821	1367	0.416661	0.943145	0.271666	0.182704	1372	0.137269	0.978631	0.323181	0.250772	1416	0.197699	0.966161	-0.0418043	0.213573	1386	0.844844	0.999322	-0.549058	0.322314	1388	0.0887024	0.991747
BMI	rs2973564	5	73151033	G	A	-0.0111	3.3e-09	690248	0.2638	0.32456	0.286918	1405	0.258168	0.916639	-0.0465856	0.16574	1367	0.778694	0.988853	-0.150206	0.180098	1372	0.404414	0.984915	-0.124307	0.246531	1416	0.614183	0.966161	-0.0412153	0.21058	1386	0.844856	0.999322	-0.375358	0.317371	1388	0.237128	0.991747
BMI	rs10838465	11	45426141	C	A	-0.014	9.1e-14	692129	0.2753	0.109701	0.293008	1405	0.708167	0.973405	-0.149596	0.169607	1367	0.377924	0.943145	0.151852	0.183958	1372	0.40925	0.984915	-0.233885	0.251717	1416	0.352967	0.966161	0.041635	0.215913	1386	0.847119	0.999322	-0.237995	0.323716	1388	0.462344	0.991747
BMI	rs2143624	20	49781718	A	G	0.0098	4.8e-09	793865	0.3483	0.180274	0.2773	1405	0.515733	0.916639	-0.0971799	0.15906	1367	0.541327	0.943145	0.0624215	0.172922	1372	0.71817	0.990772	0.240804	0.237836	1416	0.311483	0.966161	-0.0382151	0.202182	1386	0.85011	0.999322	0.0414601	0.304561	1388	0.891738	0.991747
BMI	rs11649864	17	56093061	A	G	0.0178	6.7e-09	663638	0.08124	-0.160067	0.487886	1405	0.742899	0.973405	-0.212897	0.278887	1367	0.445371	0.943145	-0.0288029	0.303332	1372	0.924365	0.996224	-0.129035	0.418642	1416	0.757958	0.966161	0.0667679	0.355348	1386	0.850987	0.999322	0.108946	0.535181	1388	0.838721	0.991747
BMI	rs16907751	8	81375457	T	C	-0.0209	1.6e-12	776010	0.09676	0.330713	0.426076	1405	0.437772	0.916639	-0.17246	0.244099	1367	0.479989	0.943145	-0.362478	0.26615	1372	0.173446	0.978631	0.0288783	0.366752	1416	0.93725	0.984638	0.0581587	0.311245	1386	0.8518	0.999322	-0.258383	0.470983	1388	0.583367	0.991747
BMI	rs954018	18	42598463	A	G	-0.013	2.1e-13	795474	0.3364	0.0707136	0.274872	1405	0.797016	0.973405	-0.0877637	0.158204	1367	0.579157	0.952555	0.0279707	0.172178	1372	0.870974	0.993096	-0.119251	0.236247	1416	0.613796	0.966161	0.0365853	0.201568	1386	0.855999	0.999322	-0.223619	0.303899	1388	0.461958	0.991747
BMI	rs7899106	10	87410904	G	A	0.0331	1e-18	793689	0.05803	0.122163	0.555333	1405	0.825918	0.976099	-0.227371	0.318561	1367	0.475509	0.943145	-0.549093	0.349203	1372	0.116087	0.978631	0.306481	0.477673	1416	0.521229	0.966161	-0.0737842	0.406938	1386	0.856147	0.999322	0.0713846	0.618135	1388	0.908078	0.991747
BMI	rs17272434	20	15085365	A	G	-0.0105	3.7e-09	789375	0.2331	0.0159244	0.324004	1405	0.960808	0.992802	-0.0698418	0.185371	1367	0.706406	0.97304	0.163942	0.202215	1372	0.417661	0.990772	0.111189	0.278684	1416	0.68997	0.966161	0.0428778	0.236518	1386	0.856168	0.999322	0.522855	0.356981	1388	0.143243	0.991747
BMI	rs6594967	5	115710803	C	T	-0.0109	3.4e-09	689250	0.4165	-0.414099	0.296898	1405	0.163312	0.916639	0.218553	0.17111	1367	0.201726	0.943145	0.124112	0.185685	1372	0.503989	0.990772	-0.245011	0.255216	1416	0.337214	0.966161	-0.0394887	0.217846	1386	0.856184	0.999322	0.184179	0.327556	1388	0.574015	0.991747
BMI	rs2694047	8	116750548	A	G	-0.0188	3.9e-21	690295	0.2229	-0.369375	0.311302	1405	0.235608	0.916639	0.20542	0.180152	1367	0.25438	0.943145	0.119611	0.194537	1372	0.538757	0.990772	-0.363704	0.267095	1416	0.17351	0.966161	-0.0412046	0.229285	1386	0.857408	0.999322	-0.102695	0.343167	1388	0.76479	0.991747
BMI	rs13209872	6	97753223	C	G	-0.0152	1.4e-16	686531	0.3526	-0.104694	0.272398	1405	0.700783	0.973405	0.121137	0.156568	1367	0.439245	0.943145	-0.0399056	0.170662	1372	0.815153	0.990772	-0.150224	0.234046	1416	0.521072	0.966161	0.0355965	0.199279	1386	0.858257	0.999322	0.368987	0.300512	1388	0.219709	0.991747
BMI	rs12776880	10	19776828	T	A	-0.0128	3e-11	676100	0.2556	-0.0413162	0.305715	1405	0.892516	0.98481	-0.0889923	0.175306	1367	0.611789	0.952555	-0.130663	0.191348	1372	0.494817	0.990772	0.200729	0.262022	1416	0.443759	0.966161	0.0397021	0.222697	1386	0.85853	0.999322	0.037505	0.336163	1388	0.911182	0.991747
BMI	rs2174367	8	89408196	T	G	-0.0121	9.3e-11	684335	0.3609	0.629601	0.277501	1405	0.0234313	0.757624	0.118051	0.160045	1367	0.460877	0.943145	0.293209	0.17507	1372	0.0942013	0.978631	0.0407566	0.239249	1416	0.864758	0.979034	0.0359649	0.203265	1386	0.859585	0.999322	-0.170787	0.30838	1388	0.579793	0.991747
BMI	rs7557796	2	86766153	T	C	0.016	2.3e-19	692414	0.3424	0.0900072	0.266943	1405	0.736033	0.973405	-0.0127913	0.153324	1367	0.933524	0.997005	-0.156097	0.16739	1372	0.351228	0.984915	0.00873464	0.228587	1416	0.969524	0.985462	0.0341945	0.194405	1386	0.860404	0.999322	0.118306	0.294444	1388	0.687899	0.991747
BMI	rs7567655	2	28273595	G	A	0.027	1.3e-09	781870	0.05051	0.279029	0.605917	1405	0.645224	0.959084	0.750556	0.347697	1367	0.0310527	0.867534	0.263641	0.376615	1372	0.484029	0.990772	0.196852	0.522248	1416	0.706281	0.966161	-0.0771769	0.445803	1386	0.862583	0.999322	-0.376672	0.667434	1388	0.572602	0.991747
BMI	rs498240	6	31892592	A	G	-0.0267	1.6e-15	679278	0.07241	0.593054	0.490801	1405	0.227122	0.916639	0.0975421	0.280992	1367	0.728544	0.980901	0.273277	0.30606	1372	0.372077	0.984915	0.680842	0.422806	1416	0.107558	0.966161	-0.0617	0.358871	1386	0.863519	0.999322	0.0992761	0.541624	1388	0.854595	0.991747
BMI	rs11581304	1	177383443	C	T	0.0182	7.1e-10	690730	0.1134	0.191247	0.421863	1405	0.650375	0.962641	0.295391	0.244456	1367	0.227121	0.943145	0.331034	0.262653	1372	0.207761	0.978631	0.276862	0.362064	1416	0.444592	0.966161	0.0530192	0.310084	1386	0.864262	0.999322	0.258218	0.463711	1388	0.57772	0.991747
BMI	rs3810291	19	47569003	G	A	-0.0274	2.1e-52	763296	0.4096	-0.167004	0.322605	1405	0.604769	0.950199	0.119498	0.185852	1367	0.520349	0.943145	0.0902483	0.201002	1372	0.653509	0.990772	-0.124716	0.277295	1416	0.652952	0.966161	0.0394438	0.236718	1386	0.867687	0.999322	-0.122385	0.355067	1388	0.730386	0.991747
BMI	rs7925214	11	130794253	C	T	-0.0147	4.4e-17	677603	0.4873	-0.037134	0.276144	1405	0.893048	0.98481	0.196226	0.158769	1367	0.216701	0.943145	0.238983	0.172641	1372	0.166502	0.978631	-0.30226	0.236947	1416	0.202292	0.966161	-0.0335143	0.202035	1386	0.868273	0.999322	0.102641	0.304422	1388	0.736044	0.991747
BMI	rs9688431	6	73922654	C	T	-0.0231	2.4e-11	789356	0.08385	0.545682	0.49278	1405	0.268332	0.916639	-0.350557	0.282742	1367	0.215247	0.943145	-0.0873792	0.311915	1372	0.779414	0.990772	0.0412916	0.424568	1416	0.922537	0.984638	-0.0598242	0.361383	1386	0.868541	0.999322	0.0641635	0.551939	1388	0.90747	0.991747
BMI	rs2246012	6	131898208	C	T	0.0158	3.1e-13	795598	0.1731	0.602031	0.34895	1405	0.0847017	0.875461	0.0753169	0.200664	1367	0.707467	0.97304	-0.126525	0.219054	1372	0.563632	0.990772	0.0584544	0.300528	1416	0.845808	0.976941	0.0404078	0.255496	1386	0.874358	0.999322	-0.162796	0.384945	1388	0.672429	0.991747
BMI	rs481554	11	28721187	A	G	-0.011	4.7e-09	691712	0.2638	-0.0802555	0.305934	1405	0.793106	0.973405	-0.0058447	0.176018	1367	0.973516	0.997005	-0.248056	0.191567	1372	0.195583	0.978631	-0.173607	0.262257	1416	0.508097	0.966161	0.0352658	0.223123	1386	0.874436	0.999322	0.0645555	0.337727	1388	0.848439	0.991747
BMI	rs17720922	9	31030917	T	C	0.0131	2.3e-09	692347	0.1755	0.296292	0.349203	1405	0.396315	0.916639	-0.0460826	0.200482	1367	0.818236	0.993871	0.0473974	0.218379	1372	0.828209	0.990772	0.625476	0.299864	1416	0.0371712	0.966161	-0.0402329	0.255203	1386	0.874755	0.999322	-0.628483	0.384716	1388	0.102566	0.991747
BMI	rs2163188	10	65314711	C	G	0.0131	2e-14	686502	0.4784	0.0268152	0.259187	1405	0.917614	0.98481	-0.0665178	0.148856	1367	0.655049	0.968423	-0.0531106	0.162008	1372	0.743092	0.990772	-0.0978691	0.222518	1416	0.660131	0.966161	-0.0298113	0.189264	1386	0.874865	0.999322	0.2319	0.28562	1388	0.41698	0.991747
BMI	rs784944	4	52927229	A	G	0.0122	3.9e-10	688210	0.3514	-0.127161	0.310507	1405	0.682215	0.968096	0.0890421	0.17884	1367	0.618645	0.958524	0.207009	0.194254	1372	0.286764	0.978631	-0.0952999	0.267245	1416	0.721444	0.966161	-0.0354548	0.228163	1386	0.876535	0.999322	0.0845416	0.343667	1388	0.80572	0.991747
BMI	rs9814633	3	41310470	A	G	0.0122	2.1e-11	691120	0.3542	0.152449	0.281145	1405	0.587738	0.94719	0.13847	0.161033	1367	0.390003	0.943145	0.235124	0.175457	1372	0.180449	0.978631	0.23541	0.241557	1416	0.329951	0.966161	-0.0312223	0.204933	1386	0.87893	0.999322	-0.19329	0.309979	1388	0.533021	0.991747
BMI	rs7599312	2	213413231	A	G	-0.0186	6.9e-24	780823	0.2677	0.282133	0.288049	1405	0.327523	0.916639	-0.0269639	0.165194	1367	0.870365	0.993871	-0.0958033	0.180568	1372	0.595807	0.990772	0.278953	0.247765	1416	0.26041	0.966161	0.0320774	0.210685	1386	0.87901	0.999322	-0.116591	0.318977	1388	0.714782	0.991747
BMI	rs11079849	17	47090785	T	C	-0.0188	4.8e-24	687694	0.2926	0.0612185	0.284557	1405	0.829693	0.978556	0.139189	0.163154	1367	0.393748	0.943145	-0.0731949	0.17876	1372	0.682268	0.990772	0.216181	0.24436	1416	0.37648	0.966161	-0.0315084	0.20748	1386	0.879318	0.999322	0.114138	0.314842	1388	0.717016	0.991747
BMI	rs12759296	1	15881237	G	T	-0.0104	1.9e-08	692127	0.2622	0.0203128	0.30438	1405	0.946802	0.989927	-0.0760189	0.174365	1367	0.662925	0.968423	0.271571	0.190234	1372	0.153648	0.978631	-0.166882	0.261179	1416	0.522956	0.966161	0.0334206	0.221626	1386	0.880158	0.999322	0.436043	0.335057	1388	0.193339	0.991747
BMI	rs10939792	4	18483405	G	C	0.0152	1.4e-15	636727	0.3032	-0.182404	0.286247	1405	0.524082	0.923132	-0.247879	0.164349	1367	0.131726	0.943145	0.0407378	0.179467	1372	0.820463	0.990772	0.0666685	0.246188	1416	0.786583	0.966161	-0.0310684	0.209374	1386	0.882059	0.999322	0.274434	0.316789	1388	0.386477	0.991747
BMI	rs12692596	2	161265910	T	C	0.011	4e-11	791438	0.3725	-0.0137853	0.271513	1405	0.959514	0.992802	0.0769912	0.156195	1367	0.622152	0.958742	-0.113889	0.170134	1372	0.503349	0.990772	0.110316	0.233116	1416	0.636127	0.966161	-0.0289666	0.198426	1386	0.883957	0.999322	0.0541715	0.300138	1388	0.856796	0.991747
BMI	rs40245	7	21470536	A	T	0.011	1.9e-09	681704	0.3058	-0.0048173	0.288682	1405	0.986688	0.995568	-0.0659657	0.165939	1367	0.69104	0.97304	0.139991	0.18037	1372	0.437805	0.990772	0.105901	0.248599	1416	0.67018	0.966161	0.0308148	0.211527	1386	0.884197	0.999322	-0.128074	0.31918	1388	0.688292	0.991747
BMI	rs4711122	6	26758479	T	C	-0.0133	1.9e-11	692595	0.2386	-0.396321	0.308548	1405	0.19919	0.916639	-0.0586972	0.177854	1367	0.741427	0.982546	0.26022	0.193375	1372	0.178632	0.978631	-0.416587	0.265328	1416	0.116621	0.966161	-0.0327618	0.226716	1386	0.885122	0.999322	0.201407	0.341885	1388	0.555886	0.991747
BMI	rs10269783	7	49616203	A	G	0.0133	1.4e-15	790551	0.3609	-0.119937	0.288601	1405	0.67778	0.965048	-0.251469	0.166265	1367	0.130651	0.943145	-0.205825	0.180997	1372	0.255666	0.978631	-0.202981	0.248068	1416	0.413356	0.966161	-0.0301961	0.21158	1386	0.886534	0.999322	0.12854	0.318614	1388	0.686691	0.991747
BMI	rs4718966	7	70040558	T	C	0.0127	4.6e-13	686820	0.4057	-0.0872401	0.264607	1405	0.741679	0.973405	0.0704657	0.15181	1367	0.6426	0.965121	0.130049	0.165824	1372	0.433023	0.990772	0.0133764	0.227213	1416	0.953063	0.984638	0.0275095	0.193088	1386	0.886728	0.999322	0.336924	0.291325	1388	0.247667	0.991747
BMI	rs3781815	11	85341933	C	T	-0.0128	8.5e-09	690329	0.2511	0.247502	0.310086	1405	0.424907	0.916639	-0.388817	0.179156	1367	0.0301603	0.867534	-0.103913	0.194804	1372	0.593827	0.990772	0.367909	0.266742	1416	0.168032	0.966161	-0.03249	0.228246	1386	0.886827	0.999322	-0.605596	0.343784	1388	0.0783661	0.991747
BMI	rs486359	6	160774441	C	G	0.0112	1.6e-11	770999	0.4918	0.0349228	0.263115	1405	0.894427	0.98481	0.0968023	0.15135	1367	0.522545	0.943145	-0.094234	0.164892	1372	0.567762	0.990772	0.199484	0.225697	1416	0.376924	0.966161	0.026522	0.191947	1386	0.890124	0.999322	-0.321269	0.289944	1388	0.268038	0.991747
BMI	rs11124991	2	44764879	T	A	-0.0123	2.1e-11	683784	0.3854	-0.457322	0.274991	1405	0.0965288	0.875461	0.0655026	0.158292	1367	0.679079	0.972051	0.0598755	0.172032	1372	0.727857	0.990772	-0.352287	0.236568	1416	0.13667	0.966161	-0.0277589	0.201745	1386	0.890582	0.999322	0.336186	0.303758	1388	0.268593	0.991747
BMI	rs2160077	14	92428410	A	G	0.0093	1.6e-08	795067	0.4199	0.20804	0.259517	1405	0.422897	0.916639	-0.193853	0.14855	1367	0.192125	0.943145	-0.160788	0.162063	1372	0.321309	0.978631	0.102244	0.22312	1416	0.646845	0.966161	-0.0260092	0.189162	1386	0.890658	0.999322	-0.0524565	0.286189	1388	0.854595	0.991747
BMI	rs10433609	3	51311574	T	A	-0.0162	1.7e-12	689684	0.2113	-0.106847	0.328855	1405	0.7453	0.973405	0.0913178	0.188957	1367	0.628981	0.958742	0.220462	0.20718	1372	0.28747	0.978631	-0.139798	0.282705	1416	0.621028	0.966161	-0.0326973	0.240934	1386	0.89207	0.999322	-0.651431	0.364075	1388	0.0737899	0.991747
BMI	rs10275044	7	1273845	A	T	-0.0129	3.3e-08	610254	0.3182	-0.165274	0.337998	1405	0.624933	0.954904	-0.259363	0.194749	1367	0.183157	0.943145	0.0443948	0.2114	1372	0.833697	0.990772	0.00872377	0.290702	1416	0.976064	0.985462	-0.0336318	0.248317	1386	0.892284	0.999322	0.5088	0.373201	1388	0.172997	0.991747
BMI	rs2796456	9	84193487	C	A	-0.0116	2.9e-09	688419	0.2398	0.094894	0.315242	1405	0.763444	0.973405	0.095997	0.181235	1367	0.596419	0.952555	-0.0654247	0.197373	1372	0.740335	0.990772	-0.0608159	0.270518	1416	0.822158	0.96912	-0.0308923	0.230136	1386	0.893237	0.999322	-0.332528	0.34606	1388	0.336774	0.991747
BMI	rs7162238	15	61447827	G	A	-0.0105	2.8e-09	682929	0.4966	0.468743	0.290678	1405	0.10706	0.875461	-0.102647	0.16699	1367	0.538863	0.943145	-0.103114	0.182031	1372	0.571173	0.990772	0.0247505	0.250306	1416	0.921247	0.984638	-0.0283794	0.212623	1386	0.893839	0.999322	-0.411614	0.320707	1388	0.199547	0.991747
BMI	rs12629015	3	119618053	G	A	-0.0135	2.1e-09	691059	0.2123	-0.497284	0.322958	1405	0.123842	0.88977	0.222557	0.186625	1367	0.233261	0.943145	0.184043	0.201743	1372	0.361792	0.984915	-0.205467	0.277525	1416	0.459207	0.966161	-0.0314236	0.23747	1386	0.894746	0.999322	-0.272266	0.355108	1388	0.443384	0.991747
BMI	rs7181610	15	35826859	T	A	-0.0145	7.8e-09	667503	0.1309	-0.200422	0.390388	1405	0.607759	0.952961	-0.155568	0.223208	1367	0.485944	0.943145	-0.0452431	0.24336	1372	0.852543	0.990772	-0.235465	0.336124	1416	0.483712	0.966161	0.0377224	0.285179	1386	0.894785	0.999322	-0.231652	0.429879	1388	0.590058	0.991747
BMI	rs10832778	11	17394073	C	G	-0.0125	1.3e-13	783042	0.3403	-0.0953094	0.276768	1405	0.730623	0.973405	0.0910316	0.158413	1367	0.565626	0.952555	-0.0383417	0.173096	1372	0.824733	0.990772	-0.278674	0.238118	1416	0.242072	0.966161	-0.0265086	0.202333	1386	0.895783	0.999322	-0.276226	0.305573	1388	0.366175	0.991747
BMI	rs2075650	19	45395619	G	A	-0.0244	1.5e-25	779741	0.1232	0.190283	0.377624	1405	0.614414	0.952961	0.507358	0.215558	1367	0.0187301	0.761121	0.238974	0.239501	1372	0.318554	0.978631	-0.225352	0.325052	1416	0.488249	0.966161	0.035404	0.275503	1386	0.897767	0.999322	-0.12607	0.421942	1388	0.765149	0.991747
BMI	rs17709991	12	116065057	C	T	0.011	2.4e-09	785052	0.2337	-0.371388	0.30374	1405	0.221644	0.916639	-0.153717	0.175295	1367	0.380695	0.943145	0.31849	0.190351	1372	0.0945237	0.978631	-0.0619363	0.260464	1416	0.812077	0.96912	0.0283674	0.222322	1386	0.898487	0.999322	-0.301341	0.33512	1388	0.368701	0.991747
BMI	rs7694732	4	115124089	G	A	-0.0099	8.7e-09	690622	0.4227	-0.24639	0.270638	1405	0.362766	0.916639	-0.107695	0.155188	1367	0.487825	0.943145	-0.0485391	0.16918	1372	0.774227	0.990772	-0.105727	0.233221	1416	0.650378	0.966161	-0.0245634	0.198113	1386	0.901344	0.999322	0.0427021	0.299396	1388	0.886605	0.991747
BMI	rs1800668	3	49395757	A	G	-0.0144	1.3e-14	692292	0.2908	0.274516	0.284708	1405	0.335112	0.916639	-0.045072	0.163339	1367	0.782635	0.992448	0.0378765	0.178324	1372	0.831825	0.990772	0.18668	0.244153	1416	0.444638	0.966161	-0.025526	0.207251	1386	0.901995	0.999322	-0.0265249	0.314007	1388	0.932693	0.991747
BMI	rs2479958	13	111984244	G	A	-0.0154	1.5e-17	664268	0.4877	-0.138995	0.277782	1405	0.616891	0.952961	0.106479	0.160377	1367	0.506849	0.943145	0.0110083	0.174472	1372	0.9497	0.996224	-0.123285	0.238577	1416	0.60541	0.966161	0.0246937	0.203668	1386	0.903515	0.999322	-0.235196	0.307207	1388	0.444048	0.991747
BMI	rs1363695	5	130378027	T	C	-0.013	3.3e-10	683063	0.2068	0.540463	0.325166	1405	0.0967151	0.875461	0.0467943	0.187516	1367	0.802975	0.992591	-0.0487459	0.204736	1372	0.811846	0.990772	0.421249	0.279493	1416	0.131988	0.966161	-0.0278529	0.238221	1386	0.90694	0.999322	0.217392	0.3606	1388	0.546701	0.991747
BMI	rs10935143	3	134665159	A	G	-0.0109	2.8e-10	688983	0.4833	0.294572	0.25962	1405	0.256726	0.916639	0.138677	0.150031	1367	0.355486	0.943145	0.24152	0.16272	1372	0.13797	0.978631	-0.0701544	0.223286	1416	0.753422	0.966161	0.0220269	0.190385	1386	0.90791	0.999322	0.209236	0.287038	1388	0.466158	0.991747
BMI	rs248139	5	167352783	A	G	0.0133	1.2e-09	683675	0.2659	0.229744	0.323795	1405	0.47811	0.916639	0.00193126	0.186161	1367	0.991724	0.997005	0.134789	0.202866	1372	0.506532	0.990772	0.23026	0.278544	1416	0.408572	0.966161	0.0274339	0.237488	1386	0.908052	0.999322	0.382757	0.358035	1388	0.285235	0.991747
BMI	rs12041258	1	195047936	C	T	-0.0146	9.5e-13	688602	0.2068	-0.0958814	0.323168	1405	0.766746	0.973405	0.100861	0.185388	1367	0.586495	0.952555	0.590625	0.200648	1372	0.00329951	0.737441	0.0117236	0.278054	1416	0.966375	0.985462	-0.0263731	0.236356	1386	0.911171	0.999322	0.216231	0.355817	1388	0.543485	0.991747
BMI	rs1956153	14	40102072	T	A	0.013	6.8e-09	692473	0.2795	-0.0901153	0.303825	1405	0.766814	0.973405	0.112845	0.174852	1367	0.518794	0.943145	-0.229425	0.190173	1372	0.227872	0.978631	0.311907	0.260956	1416	0.232193	0.966161	-0.0247728	0.222684	1386	0.911437	0.999322	-0.0442852	0.335805	1388	0.8951	0.991747
BMI	rs1021985	15	98285658	A	G	-0.0109	1.1e-09	687710	0.3245	-0.0122938	0.277461	1405	0.964665	0.992802	0.00809427	0.159295	1367	0.959482	0.997005	0.0681086	0.173646	1372	0.694953	0.990772	-0.0681184	0.237904	1416	0.77467	0.966161	0.0224517	0.202419	1386	0.911699	0.999322	0.235531	0.305407	1388	0.440718	0.991747
BMI	rs7784465	7	6418275	C	T	0.0164	1.1e-10	685477	0.16	0.176641	0.349048	1405	0.61289	0.952961	0.191334	0.200624	1367	0.34041	0.943145	0.0424658	0.21844	1372	0.845888	0.990772	0.117416	0.300505	1416	0.696057	0.966161	0.0277304	0.25601	1386	0.91376	0.999322	-0.154826	0.386336	1388	0.688664	0.991747
BMI	rs1187352	9	87293457	T	C	-0.0119	6e-11	688522	0.289	0.212011	0.287139	1405	0.460423	0.916639	0.0791257	0.165014	1367	0.631654	0.958742	0.0581145	0.179268	1372	0.745854	0.990772	0.292134	0.246355	1416	0.235891	0.966161	-0.022166	0.20956	1386	0.915777	0.999322	0.106676	0.316128	1388	0.735833	0.991747
BMI	rs903959	8	142630782	A	T	0.0106	1.6e-09	689895	0.3246	-0.245253	0.294324	1405	0.404833	0.916639	0.172262	0.168771	1367	0.307586	0.943145	0.404813	0.184345	1372	0.0282643	0.92974	-0.261093	0.253173	1416	0.302586	0.966161	-0.0226684	0.215345	1386	0.91618	0.999322	-0.372081	0.325759	1388	0.253571	0.991747
BMI	rs4521182	3	28631124	T	C	0.0104	3.7e-08	688234	0.3529	0.301496	0.275467	1405	0.273929	0.916639	0.191197	0.158479	1367	0.227855	0.943145	0.109623	0.172058	1372	0.52415	0.990772	0.156731	0.236581	1416	0.507768	0.966161	0.020839	0.201574	1386	0.917675	0.999322	0.075523	0.303536	1388	0.803544	0.991747
BMI	rs8075273	17	61728881	A	C	-0.0133	3.7e-13	795026	0.2635	0.444502	0.299347	1405	0.137795	0.916639	0.163899	0.171895	1367	0.340516	0.943145	0.111779	0.187157	1372	0.550441	0.990772	0.514974	0.257295	1416	0.0455316	0.966161	-0.0226474	0.21929	1386	0.917759	0.999322	0.225665	0.330665	1388	0.495065	0.991747
BMI	rs7133378	12	124409502	A	G	0.0125	9.4e-13	784423	0.347	-0.351362	0.279319	1405	0.208631	0.916639	-0.155501	0.160303	1367	0.332197	0.943145	-0.114472	0.174993	1372	0.513126	0.990772	-0.146043	0.240159	1416	0.543212	0.966161	0.0210134	0.20395	1386	0.917953	0.999322	-0.186227	0.308362	1388	0.545994	0.991747
BMI	rs7560871	2	145616899	A	G	0.0218	9.6e-11	691571	0.04985	0.632058	0.623708	1405	0.311051	0.916639	0.68794	0.356589	1367	0.0539126	0.943145	0.384522	0.389781	1372	0.32406	0.978631	0.600059	0.537467	1416	0.264417	0.966161	0.046659	0.454852	1386	0.918311	0.999322	-0.503819	0.690695	1388	0.465858	0.991747
BMI	rs853681	6	28296650	A	C	0.0143	1.7e-09	686719	0.1734	0.461636	0.349353	1405	0.186584	0.916639	0.390639	0.202378	1367	0.053785	0.943145	0.245298	0.220535	1372	0.266212	0.978631	0.127974	0.300505	1416	0.670273	0.966161	-0.0262689	0.256742	1386	0.91852	0.999322	0.0972565	0.387802	1388	0.802015	0.991747
BMI	rs12904652	15	72548765	C	T	-0.0113	1.9e-08	691051	0.2738	-0.313586	0.289241	1405	0.278478	0.916639	-0.0365703	0.166474	1367	0.826157	0.993871	-0.0629134	0.181122	1372	0.72838	0.990772	-0.28613	0.247873	1416	0.248556	0.966161	-0.0214868	0.211434	1386	0.91907	0.999322	-0.334105	0.318661	1388	0.294609	0.991747
BMI	rs1045411	13	31033232	T	C	-0.0148	2.3e-15	776153	0.2107	-0.0891641	0.321424	1405	0.781512	0.973405	-0.0912099	0.184033	1367	0.620245	0.958742	-0.225554	0.200635	1372	0.261125	0.978631	-0.233241	0.276282	1416	0.398694	0.966161	-0.0234902	0.234592	1386	0.920254	0.999322	0.310758	0.354296	1388	0.380579	0.991747
BMI	rs10163018	15	53525415	T	C	-0.0114	1.5e-10	689715	0.4467	0.45743	0.264569	1405	0.0840367	0.875461	-0.123402	0.152278	1367	0.417867	0.943145	0.0617724	0.166287	1372	0.710338	0.990772	0.238036	0.227498	1416	0.295592	0.966161	-0.0191587	0.193766	1386	0.921251	0.999322	0.188544	0.292852	1388	0.5198	0.991747
BMI	rs6818414	4	16600664	T	C	-0.0097	1.6e-08	685947	0.4992	-0.316981	0.257178	1405	0.217956	0.916639	0.209627	0.148083	1367	0.157121	0.943145	0.164815	0.161452	1372	0.307516	0.978631	-0.108045	0.220727	1416	0.624566	0.966161	0.0184293	0.188122	1386	0.921975	0.999322	0.0190631	0.284032	1388	0.946499	0.991747
BMI	rs11080090	17	27502029	G	A	0.0134	5.7e-09	776694	0.1492	0.0821499	0.40559	1405	0.839521	0.979806	0.259232	0.232882	1367	0.265843	0.943145	0.159047	0.253815	1372	0.531009	0.990772	0.0943749	0.345901	1416	0.785018	0.966161	0.0279054	0.293804	1386	0.924345	0.999322	0.110353	0.444946	1388	0.80416	0.991747
BMI	rs459552	5	112176756	T	A	0.0126	1.7e-10	782145	0.21	-0.235656	0.348855	1405	0.499462	0.916639	-0.011803	0.200743	1367	0.953123	0.997005	0.139971	0.217678	1372	0.52032	0.990772	-0.537456	0.29978	1416	0.0732143	0.966161	0.0241627	0.255846	1386	0.924772	0.999322	-0.314198	0.384739	1388	0.414268	0.991747
BMI	rs6661316	1	210095527	C	T	-0.0106	6.8e-11	795169	0.4423	0.215894	0.277168	1405	0.436155	0.916639	0.0600163	0.159127	1367	0.706115	0.97304	0.00523355	0.173467	1372	0.975936	0.997535	-0.0925452	0.238482	1416	0.698031	0.966161	-0.0186729	0.202985	1386	0.926718	0.999322	-0.0428393	0.30647	1388	0.888852	0.991747
BMI	rs29941	19	34309532	A	G	-0.0152	5.1e-18	794542	0.3011	-0.433174	0.283252	1405	0.126421	0.88977	0.0705354	0.162946	1367	0.665174	0.968423	-0.0120064	0.177687	1372	0.946137	0.996224	-0.282504	0.243378	1416	0.245937	0.966161	-0.0187387	0.207444	1386	0.928037	0.999322	0.333599	0.313151	1388	0.286929	0.991747
BMI	rs33485	3	42417982	C	T	0.0158	1.1e-15	690171	0.2202	-0.537098	0.328384	1405	0.102153	0.875461	-0.066865	0.188826	1367	0.723312	0.979616	0.0110742	0.206099	1372	0.957156	0.996224	-0.301017	0.281501	1416	0.285106	0.966161	-0.0214851	0.239391	1386	0.9285	0.999322	0.0913877	0.362448	1388	0.80097	0.991747
BMI	rs11921432	3	35117776	C	T	0.018	8e-11	674904	0.0948	-0.0953091	0.460907	1405	0.836207	0.979776	0.230893	0.266616	1367	0.386637	0.943145	-0.0860507	0.290104	1372	0.766802	0.990772	-0.209121	0.396287	1416	0.59779	0.966161	0.0302493	0.339953	1386	0.92911	0.999322	0.0829318	0.511648	1388	0.871261	0.991747
BMI	rs1814170	7	138794149	T	A	-0.0203	2.1e-12	686628	0.1257	-0.145172	0.434419	1405	0.738297	0.973405	-0.155312	0.248441	1367	0.531982	0.943145	0.151142	0.271925	1372	0.578424	0.990772	-0.0539992	0.373666	1416	0.885117	0.982786	-0.0278553	0.317217	1386	0.930039	0.999322	-0.27412	0.480748	1388	0.568638	0.991747
BMI	rs9904177	17	4755424	G	A	0.0117	2.3e-09	689596	0.2952	0.0361839	0.286338	1405	0.899459	0.98481	0.182633	0.163766	1367	0.264958	0.943145	0.0132329	0.178722	1372	0.940988	0.996224	0.235419	0.245428	1416	0.337613	0.966161	0.0170122	0.208243	1386	0.934902	0.999322	-0.111759	0.314737	1388	0.722578	0.991747
BMI	rs2744974	6	34579431	T	C	0.0249	1.4e-45	789647	0.3745	-0.134689	0.291923	1405	0.644595	0.959084	0.0220517	0.167907	1367	0.895532	0.993871	0.117059	0.18309	1372	0.522701	0.990772	0.0585995	0.250061	1416	0.814754	0.96912	0.0173656	0.213115	1386	0.935069	0.999322	-0.0525107	0.321855	1388	0.870424	0.991747
BMI	rs4877313	9	88915566	T	A	-0.0129	4.1e-10	691598	0.2393	0.123727	0.305982	1405	0.68601	0.969427	-0.462106	0.175395	1367	0.00851853	0.644967	-0.393397	0.190987	1372	0.0396071	0.92974	0.0614506	0.263252	1416	0.815462	0.96912	0.0181356	0.224143	1386	0.935524	0.999322	0.110709	0.337961	1388	0.74328	0.991747
BMI	rs7600699	2	156018263	G	C	0.0149	6.4e-10	691202	0.1447	0.204066	0.411773	1405	0.620269	0.954904	-0.376955	0.236058	1367	0.110527	0.943145	0.224739	0.25808	1372	0.38401	0.984915	0.43547	0.353995	1416	0.218844	0.966161	-0.0243425	0.301319	1386	0.935624	0.999322	0.443096	0.45393	1388	0.329169	0.991747
BMI	rs429343	2	147903382	A	G	0.015	6.8e-18	689345	0.4987	0.327296	0.261621	1405	0.211133	0.916639	-0.218307	0.150602	1367	0.147413	0.943145	-0.138601	0.163926	1372	0.397977	0.984915	0.459586	0.224819	1416	0.0411147	0.966161	0.0150582	0.192228	1386	0.937573	0.999322	0.143505	0.289639	1388	0.620352	0.991747
BMI	rs6435622	2	212296094	C	G	0.0125	2.5e-11	688472	0.2826	0.0353872	0.284377	1405	0.900987	0.98481	0.0530337	0.162843	1367	0.744722	0.982546	0.0564893	0.178373	1372	0.751527	0.990772	0.244745	0.24418	1416	0.316366	0.966161	-0.0161853	0.207068	1386	0.937709	0.999322	-0.335179	0.314328	1388	0.28646	0.991747
BMI	rs10192119	2	164581241	G	T	0.0166	3e-14	795369	0.2144	-0.0868064	0.336085	1405	0.796224	0.973405	-0.144679	0.193896	1367	0.455694	0.943145	-0.0915342	0.210637	1372	0.663952	0.990772	-0.251146	0.288316	1416	0.38386	0.966161	0.0185571	0.246483	1386	0.939997	0.999322	0.154695	0.371173	1388	0.676909	0.991747
BMI	rs1903579	4	91253956	G	C	-0.0111	1.1e-10	690564	0.3897	0.325469	0.273787	1405	0.234734	0.916639	-0.299897	0.157671	1367	0.0573775	0.943145	-0.222174	0.171755	1372	0.19604	0.978631	0.0955398	0.235079	1416	0.6845	0.966161	0.0150379	0.200137	1386	0.940116	0.999322	0.0863319	0.302575	1388	0.775439	0.991747
BMI	rs7748777	6	41133806	G	A	-0.0105	1.6e-10	790069	0.4541	0.0404866	0.27927	1405	0.884753	0.98481	-0.272846	0.160553	1367	0.089472	0.943145	-0.222943	0.174522	1372	0.201662	0.978631	0.312143	0.239683	1416	0.193022	0.966161	0.0150885	0.204416	1386	0.94117	0.999322	0.0842326	0.307863	1388	0.78443	0.991747
BMI	rs11754747	6	141494602	T	C	0.0116	1.4e-09	785058	0.1939	-0.507642	0.355124	1405	0.15309	0.916639	0.0687815	0.204568	1367	0.736752	0.982546	-0.0418746	0.222151	1372	0.850516	0.990772	-0.504734	0.304353	1416	0.097463	0.966161	-0.0189503	0.258964	1386	0.941676	0.999322	0.573109	0.390679	1388	0.142617	0.991747
BMI	rs12595158	15	62316035	T	C	-0.0394	1.9e-13	775095	0.04152	0.584947	0.641989	1405	0.362375	0.916639	0.0537599	0.368493	1367	0.884029	0.993871	-0.0449061	0.402168	1372	0.91111	0.996224	0.0891014	0.55389	1416	0.872223	0.982786	0.0343172	0.471402	1386	0.941977	0.999322	0.0515977	0.71334	1388	0.942348	0.991747
BMI	rs2192158	4	55505360	A	G	0.0129	8.3e-14	690727	0.4799	0.155148	0.263374	1405	0.555904	0.935331	-0.303766	0.151252	1367	0.0448053	0.931534	-0.164282	0.165094	1372	0.319876	0.978631	-0.224977	0.226272	1416	0.320258	0.966161	-0.0139312	0.192606	1386	0.94235	0.999322	-0.412266	0.290731	1388	0.156408	0.991747
BMI	rs2162524	2	230817437	C	T	0.0155	4.1e-17	691302	0.2643	-0.424042	0.327021	1405	0.194955	0.916639	0.090713	0.187825	1367	0.629199	0.958742	-0.0928096	0.205266	1372	0.651239	0.990772	-0.5017	0.280614	1416	0.0740129	0.966161	0.0168669	0.239081	1386	0.943767	0.999322	0.400914	0.361296	1388	0.267342	0.991747
BMI	rs4072917	8	143300279	A	G	0.0115	6.9e-11	684720	0.4343	-0.242367	0.2758	1405	0.379672	0.916639	-0.0268187	0.158784	1367	0.8659	0.993871	-0.157786	0.172784	1372	0.361301	0.984915	-0.143272	0.236444	1416	0.54465	0.966161	-0.0139512	0.201678	1386	0.94486	0.999322	0.0326298	0.303923	1388	0.914517	0.991747
BMI	rs12545740	8	33455300	C	A	-0.0105	2.5e-09	674019	0.4655	0.00418415	0.279705	1405	0.988067	0.995568	-0.0165657	0.160697	1367	0.917909	0.993871	-0.114745	0.174789	1372	0.51163	0.990772	-0.0075954	0.240208	1416	0.97478	0.985462	0.0140778	0.204409	1386	0.945103	0.999322	0.146436	0.308618	1388	0.635226	0.991747
BMI	rs16847706	1	174983207	G	T	0.0176	1.9e-10	691032	0.1031	-1.31401	0.425802	1405	0.00206896	0.616549	-0.0199296	0.247835	1367	0.935919	0.997005	-0.163724	0.269376	1372	0.543429	0.990772	-0.558314	0.366677	1416	0.128075	0.966161	-0.0214316	0.312522	1386	0.945337	0.999322	0.699846	0.471527	1388	0.137982	0.991747
BMI	rs1227244	10	66590825	G	A	0.0106	1e-08	682133	0.3127	0.0141733	0.314448	1405	0.964055	0.992802	-0.098525	0.180474	1367	0.58521	0.952555	-0.0421311	0.196616	1372	0.83036	0.990772	-0.0499683	0.269676	1416	0.853028	0.978015	-0.0148963	0.229492	1386	0.948255	0.999322	0.0317723	0.346458	1388	0.926945	0.991747
BMI	rs10474271	5	87454270	C	T	-0.014	8.7e-12	688822	0.2699	0.46073	0.319361	1405	0.149341	0.916639	-0.372955	0.183923	1367	0.0427784	0.931534	-0.165162	0.199215	1372	0.407213	0.984915	-0.0364963	0.274568	1416	0.894274	0.984638	-0.0145487	0.233749	1386	0.95038	0.999322	-0.0744929	0.351272	1388	0.832087	0.991747
BMI	rs1928295	9	120378483	C	T	-0.0141	5.4e-18	793649	0.4376	0.172168	0.260464	1405	0.50872	0.916639	-0.128949	0.149652	1367	0.389031	0.943145	0.0025502	0.162646	1372	0.987492	0.997535	0.13495	0.223794	1416	0.5466	0.966161	0.0117802	0.190013	1386	0.950574	0.999322	-0.0168315	0.286584	1388	0.953175	0.991747
BMI	rs12148330	15	41995199	A	T	0.0142	1.5e-10	692532	0.204	-0.189689	0.3422	1405	0.579448	0.94719	-0.0055274	0.196958	1367	0.977615	0.997005	0.121611	0.213696	1372	0.569392	0.990772	-0.479906	0.294001	1416	0.102834	0.966161	0.0144525	0.250777	1386	0.954051	0.999322	-0.187851	0.377662	1388	0.618983	0.991747
BMI	rs4954638	2	137435455	C	A	-0.0118	2.9e-09	689971	0.3369	0.396364	0.292881	1405	0.176171	0.916639	-0.0889013	0.169411	1367	0.599831	0.952555	-0.0572026	0.183566	1372	0.755378	0.990772	-0.189581	0.25179	1416	0.451616	0.966161	-0.0121148	0.21462	1386	0.954993	0.999322	-0.251073	0.323153	1388	0.437322	0.991747
BMI	rs2396625	7	113028634	A	T	-0.0162	3.6e-20	678792	0.3933	0.031297	0.277249	1405	0.910139	0.98481	0.00135959	0.159539	1367	0.993202	0.997005	-0.108868	0.17346	1372	0.530355	0.990772	0.0514054	0.238358	1416	0.82928	0.96912	0.0114577	0.203015	1386	0.955001	0.999322	0.15331	0.306479	1388	0.616992	0.991747
BMI	rs2198679	13	89131240	G	A	-0.0107	5.6e-10	688014	0.4691	0.197305	0.268409	1405	0.462407	0.916639	0.192332	0.154443	1367	0.213227	0.943145	0.233571	0.167443	1372	0.163266	0.978631	0.279098	0.229902	1416	0.224957	0.966161	-0.0109536	0.195925	1386	0.955424	0.999322	0.0368817	0.294784	1388	0.900452	0.991747
BMI	rs5751239	22	42592239	C	T	-0.0109	3.6e-10	686031	0.4286	0.358732	0.273194	1405	0.189365	0.916639	-0.0275248	0.158047	1367	0.861769	0.993871	-0.115177	0.171275	1372	0.501399	0.990772	0.419619	0.234767	1416	0.074091	0.966161	0.0109611	0.200941	1386	0.956506	0.999322	-0.0154185	0.302564	1388	0.959365	0.991747
BMI	rs7987314	13	53485153	G	T	0.0146	1.4e-08	793677	0.1228	0.0156222	0.404092	1405	0.969167	0.992802	-0.0774073	0.232216	1367	0.738928	0.982546	-0.257583	0.253991	1372	0.310695	0.978631	-0.0996278	0.347275	1416	0.774243	0.966161	-0.0153227	0.296087	1386	0.958735	0.999322	0.310931	0.448782	1388	0.488532	0.991747
BMI	rs10744146	12	17212881	A	G	-0.0122	1.4e-12	689141	0.4895	0.768414	0.264961	1405	0.00378889	0.748434	-0.165037	0.153772	1367	0.283347	0.943145	-0.0374053	0.16708	1372	0.822888	0.990772	0.182107	0.228425	1416	0.425452	0.966161	-0.0100611	0.195128	1386	0.958885	0.999322	0.0161438	0.293713	1388	0.956175	0.991747
BMI	rs6461115	7	2103668	G	A	-0.0144	1.2e-13	791735	0.265	-0.232096	0.30034	1405	0.439786	0.916639	-0.0791874	0.172845	1367	0.646924	0.965121	-0.0821441	0.188438	1372	0.662963	0.990772	0.164777	0.258377	1416	0.523747	0.966161	-0.010637	0.219816	1386	0.961412	0.999322	0.202633	0.332484	1388	0.542326	0.991747
BMI	rs1316369	2	241351756	G	A	-0.0101	4.7e-08	687811	0.3908	-0.230791	0.270897	1405	0.394387	0.916639	0.0673658	0.155552	1367	0.665029	0.968423	0.0334971	0.169412	1372	0.843289	0.990772	-0.29317	0.233021	1416	0.208555	0.966161	0.00925717	0.198341	1386	0.962781	0.999322	-0.152795	0.299497	1388	0.610013	0.991747
BMI	rs9540493	13	66205704	A	G	0.0139	8.1e-17	785493	0.4887	0.341454	0.264712	1405	0.197297	0.916639	0.0953588	0.152913	1367	0.532987	0.943145	0.0369956	0.166085	1372	0.823763	0.990772	0.538492	0.227013	1416	0.0178226	0.966161	0.00892484	0.194333	1386	0.963376	0.999322	-0.396228	0.292606	1388	0.175915	0.991747
BMI	rs11736228	4	147376805	T	A	-0.0139	4.1e-12	691580	0.2659	0.0271714	0.288001	1405	0.924849	0.985293	0.0806797	0.166661	1367	0.628398	0.958742	0.105607	0.180945	1372	0.559558	0.990772	0.343861	0.247564	1416	0.16506	0.966161	-0.0095161	0.212101	1386	0.964221	0.999322	0.448554	0.319165	1388	0.160129	0.991747
BMI	rs13130964	4	102686316	A	T	0.0123	4.4e-09	676135	0.2354	0.281688	0.313902	1405	0.369673	0.916639	-0.045913	0.18007	1367	0.798782	0.992591	-0.105233	0.196335	1372	0.592055	0.990772	0.0423931	0.270194	1416	0.875347	0.982786	0.0102394	0.228995	1386	0.964342	0.999322	-0.218749	0.346992	1388	0.528528	0.991747
BMI	rs10894670	11	133221987	C	A	0.0096	5e-09	787939	0.4758	0.235997	0.262646	1405	0.369055	0.916639	-0.105912	0.150898	1367	0.482876	0.943145	0.00858856	0.164369	1372	0.958336	0.996224	-0.0263399	0.225628	1416	0.907082	0.984638	-0.0084036	0.1922	1386	0.965131	0.999322	0.367703	0.289025	1388	0.203512	0.991747
BMI	rs1007934	14	73463479	A	G	-0.012	7.6e-12	692411	0.3323	0.451239	0.282816	1405	0.110823	0.875461	0.174292	0.162164	1367	0.28266	0.943145	0.0883083	0.17726	1372	0.618435	0.990772	0.0927891	0.243193	1416	0.702857	0.966161	-0.009002	0.206426	1386	0.965223	0.999322	-0.168502	0.312756	1388	0.590137	0.991747
BMI	rs13047416	21	40309436	G	C	-0.0154	2.2e-17	683228	0.3511	0.0291106	0.279331	1405	0.917014	0.98481	-0.158802	0.16101	1367	0.324169	0.943145	-0.179398	0.174625	1372	0.304446	0.978631	-0.219969	0.24006	1416	0.359661	0.966161	0.00840831	0.204825	1386	0.967261	0.999322	0.0190914	0.308465	1388	0.950658	0.991747
BMI	rs1296328	4	137083193	C	A	-0.0179	4.9e-24	683488	0.4631	-0.0975708	0.278682	1405	0.726306	0.973405	-0.0492498	0.160058	1367	0.758359	0.982546	-0.247837	0.173869	1372	0.154264	0.978631	-0.150149	0.238878	1416	0.52974	0.966161	-0.0078145	0.203666	1386	0.969399	0.999322	0.0712067	0.30622	1388	0.816158	0.991747
BMI	rs6964833	7	74101909	C	T	0.0157	1.2e-16	767150	0.2303	0.228502	0.303938	1405	0.452295	0.916639	0.159629	0.175073	1367	0.362045	0.943145	0.233662	0.19068	1372	0.220632	0.978631	0.0580915	0.261522	1416	0.824246	0.96912	0.0079727	0.222322	1386	0.971398	0.999322	0.0115373	0.336946	1388	0.97269	0.991747
BMI	rs739742	12	113184739	C	A	-0.0119	1.7e-11	789947	0.3137	-0.119293	0.278852	1405	0.668863	0.965048	0.304086	0.159574	1367	0.056912	0.943145	0.0490383	0.17405	1372	0.778179	0.990772	-0.0644328	0.239859	1416	0.788256	0.966161	-0.0069585	0.203837	1386	0.972772	0.999322	-0.018567	0.307596	1388	0.951876	0.991747
BMI	rs12989476	2	207197155	T	C	0.013	5e-13	687666	0.2944	-0.0792672	0.280537	1405	0.77756	0.973405	-0.178516	0.161256	1367	0.268475	0.943145	-0.146061	0.175606	1372	0.405694	0.984915	0.10623	0.241356	1416	0.659905	0.966161	-0.006841	0.205168	1386	0.973406	0.999322	-0.227356	0.310143	1388	0.463641	0.991747
BMI	rs3736485	15	51748610	A	G	0.0134	2.5e-16	790404	0.4908	0.448615	0.262082	1405	0.0871687	0.875461	0.171656	0.150851	1367	0.255359	0.943145	-0.306469	0.164434	1372	0.0625686	0.978631	0.141788	0.225283	1416	0.529204	0.966161	-0.0060035	0.191589	1386	0.975007	0.999322	0.325186	0.289558	1388	0.261615	0.991747
BMI	rs10243319	7	147674678	C	T	-0.0107	1.2e-09	690936	0.431	-0.103026	0.266487	1405	0.699107	0.973405	0.365112	0.152567	1367	0.0168414	0.730181	0.0726979	0.166758	1372	0.662943	0.990772	-0.147913	0.228496	1416	0.517524	0.966161	0.00594972	0.19429	1386	0.975575	0.999322	0.02146	0.293646	1388	0.941752	0.991747
BMI	rs3844598	5	140992235	A	G	-0.0095	3.8e-08	690704	0.4858	-0.218339	0.255036	1405	0.392084	0.916639	0.0417968	0.146441	1367	0.775368	0.987373	-0.0725802	0.159944	1372	0.650057	0.990772	-0.360214	0.218986	1416	0.10021	0.966161	-0.0048691	0.186547	1386	0.97918	0.999322	0.0611455	0.28205	1388	0.828405	0.991747
BMI	rs17681708	17	9792872	C	T	0.0106	7.2e-09	692361	0.2256	0.161734	0.331995	1405	0.626223	0.954904	-0.167185	0.190841	1367	0.381162	0.943145	0.0497415	0.206974	1372	0.810113	0.990772	0.193027	0.285363	1416	0.498882	0.966161	-0.0060867	0.243396	1386	0.980053	0.999322	0.0121065	0.365615	1388	0.97359	0.991747
BMI	rs995258	1	97431052	C	A	-0.0144	4.5e-17	692419	0.3669	-0.0558562	0.295293	1405	0.849999	0.981618	0.00851858	0.169583	1367	0.959945	0.997005	-0.177144	0.184738	1372	0.337783	0.978631	0.2441	0.253424	1416	0.33561	0.966161	0.00520277	0.215477	1386	0.98074	0.999322	-0.0678357	0.325424	1388	0.834906	0.991747
BMI	rs9527455	13	56465597	A	C	-0.0117	8e-09	689591	0.1742	0.0934484	0.360437	1405	0.79547	0.973405	0.293081	0.207507	1367	0.158064	0.943145	0.345007	0.227016	1372	0.128808	0.978631	0.213334	0.309076	1416	0.490164	0.966161	-0.0062468	0.26303	1386	0.981056	0.999322	-0.445124	0.399855	1388	0.265811	0.991747
BMI	rs17551974	2	142293146	A	C	-0.0141	1.9e-10	691115	0.1803	-0.310056	0.335459	1405	0.355504	0.916639	-0.245724	0.193473	1367	0.204279	0.943145	0.0526623	0.211712	1372	0.803596	0.990772	0.349366	0.288448	1416	0.226025	0.966161	-0.0056537	0.245578	1386	0.981636	0.999322	-0.217194	0.372246	1388	0.559673	0.991747
BMI	rs6419734	3	78458928	T	C	0.0174	1.9e-12	688250	0.1291	0.277309	0.41707	1405	0.506226	0.916639	0.0310592	0.23929	1367	0.896746	0.993871	-0.166111	0.263595	1372	0.528686	0.990772	0.278669	0.358582	1416	0.437206	0.966161	-0.0067593	0.303686	1386	0.982246	0.999322	0.210653	0.4628	1388	0.649058	0.991747
BMI	rs1361739	1	96289734	A	G	-0.0176	6.9e-22	689358	0.3217	0.235664	0.276568	1405	0.394304	0.916639	-0.143075	0.158561	1367	0.367041	0.943145	-0.14445	0.173112	1372	0.404183	0.984915	0.140946	0.237604	1416	0.553146	0.966161	0.00448418	0.201857	1386	0.98228	0.999322	0.0500225	0.305292	1388	0.869872	0.991747
BMI	rs7551507	1	74995225	T	C	-0.0184	9.3e-30	794579	0.4637	0.100199	0.267239	1405	0.70776	0.973405	0.089016	0.153104	1367	0.561062	0.952555	-0.374436	0.166989	1372	0.0251038	0.92974	0.068886	0.229676	1416	0.764277	0.966161	-0.0041995	0.19499	1386	0.98282	0.999322	0.0853512	0.294885	1388	0.772289	0.991747
BMI	rs3852012	3	44045981	G	A	0.0131	1.4e-13	790499	0.2481	-0.735021	0.338172	1405	0.0299099	0.763984	-0.272987	0.194666	1367	0.161043	0.943145	-0.458285	0.212679	1372	0.0313512	0.92974	-0.0272814	0.290065	1416	0.925081	0.984638	0.00523587	0.246174	1386	0.983034	0.999322	-0.0951511	0.373052	1388	0.798714	0.991747
BMI	rs12439798	15	46584787	T	G	0.0125	6.9e-13	690093	0.4926	0.118369	0.276719	1405	0.668892	0.965048	0.0114484	0.159715	1367	0.942867	0.997005	0.0337242	0.1736	1372	0.845998	0.990772	0.0483573	0.238178	1416	0.839141	0.973012	-0.004234	0.203542	1386	0.983407	0.999322	-0.0109302	0.306581	1388	0.971565	0.991747
BMI	rs9475173	6	55013291	G	A	-0.0108	6.6e-09	678491	0.3506	0.114597	0.275867	1405	0.677909	0.965048	0.0663637	0.158804	1367	0.676089	0.972051	0.064433	0.172935	1372	0.709515	0.990772	-0.197645	0.237079	1416	0.40461	0.966161	-0.0040393	0.202035	1386	0.984052	0.999322	-0.265216	0.304999	1388	0.38469	0.991747
BMI	rs9302083	13	96374386	C	T	-0.0108	4.3e-10	691323	0.434	0.521027	0.286036	1405	0.0687383	0.875461	0.145713	0.164633	1367	0.376272	0.943145	-0.0183571	0.180167	1372	0.918859	0.996224	0.294188	0.246489	1416	0.23287	0.966161	0.00409055	0.209982	1386	0.984461	0.999322	0.0212495	0.317955	1388	0.946725	0.991747
BMI	rs7534091	1	118864616	G	A	0.0113	1e-09	788883	0.2519	0.160542	0.304852	1405	0.598541	0.948367	0.0537894	0.175403	1367	0.759148	0.982546	-0.0216556	0.191056	1372	0.909772	0.996224	-0.103456	0.262096	1416	0.693106	0.966161	0.00343898	0.223286	1386	0.987714	0.999322	0.215218	0.336248	1388	0.522241	0.991747
BMI	rs6471941	8	62117973	A	G	0.0156	3.1e-13	793986	0.2074	-0.0603442	0.327357	1405	0.853776	0.981618	-0.14538	0.187764	1367	0.438905	0.943145	-0.0271009	0.205706	1372	0.895205	0.996224	0.0505629	0.280739	1416	0.857095	0.978599	0.00354921	0.238682	1386	0.988138	0.999322	-0.323564	0.362268	1388	0.371927	0.991747
BMI	rs2616192	8	20668624	G	T	-0.0125	2.1e-11	683969	0.2455	-0.0298055	0.320184	1405	0.925846	0.985293	0.125047	0.183097	1367	0.494753	0.943145	0.0578564	0.200939	1372	0.773444	0.990772	-0.112729	0.274979	1416	0.681901	0.966161	-0.0031004	0.23303	1386	0.989387	0.999322	-0.289536	0.354152	1388	0.413757	0.991747
BMI	rs845084	10	125220036	A	G	0.014	1.3e-12	685413	0.2733	-0.342162	0.288725	1405	0.236188	0.916639	0.0181209	0.165596	1367	0.912879	0.993871	0.254649	0.180824	1372	0.15928	0.978631	-0.0842459	0.247951	1416	0.734082	0.966161	0.00234012	0.210639	1386	0.991138	0.999322	-0.549472	0.317673	1388	0.0839117	0.991747
BMI	rs10182181	2	25150296	A	G	-0.0325	6.7e-90	792111	0.4962	-0.0661801	0.267155	1405	0.804387	0.973742	0.233529	0.153464	1367	0.128314	0.943145	0.289427	0.166367	1372	0.0821398	0.978631	-0.0178047	0.229479	1416	0.938167	0.984638	-0.0020473	0.195463	1386	0.991645	0.999322	-0.106203	0.293879	1388	0.717869	0.991747
BMI	rs6449532	5	60715446	T	C	-0.0127	1.2e-12	691904	0.3447	-0.0126952	0.294544	1405	0.965627	0.992802	0.147289	0.168862	1367	0.383229	0.943145	0.148902	0.184595	1372	0.420014	0.990772	-0.153988	0.253527	1416	0.543695	0.966161	0.00179311	0.215374	1386	0.993358	0.999322	-0.120925	0.326534	1388	0.711195	0.991747
BMI	rs4430672	14	63094407	T	C	0.0127	3.9e-09	691400	0.2064	-0.441388	0.328309	1405	0.179029	0.916639	-0.0878766	0.189794	1367	0.643432	0.965121	0.259179	0.205297	1372	0.207001	0.978631	-0.42927	0.282421	1416	0.128745	0.966161	-0.0019052	0.241298	1386	0.993701	0.999322	-0.354373	0.362986	1388	0.329101	0.991747
BMI	rs4653017	1	33776728	C	T	-0.0122	4.5e-11	686378	0.2998	0.0413988	0.30889	1405	0.893402	0.98481	-0.0041863	0.17895	1367	0.98134	0.997005	0.229054	0.19355	1372	0.236843	0.978631	0.311293	0.265116	1416	0.240524	0.966161	0.00167917	0.227232	1386	0.994105	0.999322	0.127558	0.341616	1388	0.708911	0.991747
BMI	rs10818810	9	126096522	A	G	0.0126	1.1e-13	770877	0.3558	0.445504	0.266389	1405	0.0946741	0.875461	-0.215039	0.153476	1367	0.161408	0.943145	-0.0537628	0.167279	1372	0.74796	0.990772	0.433965	0.22849	1416	0.057733	0.966161	-0.0012924	0.19508	1386	0.994715	0.999322	0.227492	0.294688	1388	0.44026	0.991747
BMI	rs4670627	2	37046711	C	T	-0.0105	2.6e-10	794641	0.4464	0.197436	0.288104	1405	0.493273	0.916639	-0.350161	0.16569	1367	0.0347532	0.887697	-0.16579	0.180361	1372	0.358148	0.984915	0.0729805	0.247952	1416	0.768547	0.966161	0.00118398	0.211104	1386	0.995526	0.999322	0.401099	0.318338	1388	0.20789	0.991747
BMI	rs4812405	20	35276585	A	C	-0.0204	1e-09	676993	0.05754	-0.170644	0.578395	1405	0.768015	0.973405	0.466425	0.332722	1367	0.16119	0.943145	0.131008	0.359794	1372	0.715826	0.990772	-0.36913	0.497304	1416	0.458052	0.966161	-0.001771	0.423796	1386	0.996666	0.999322	-0.0602725	0.634836	1388	0.924375	0.991747
BMI	rs17805532	6	18497348	T	C	0.0226	5.2e-09	679164	0.08549	0.385367	0.48354	1405	0.425604	0.916639	-0.0131525	0.277013	1367	0.962138	0.997005	-0.0349266	0.302705	1372	0.90816	0.996224	0.338212	0.41595	1416	0.416294	0.966161	0.00125501	0.353697	1386	0.997169	0.999322	0.0696339	0.533124	1388	0.896099	0.991747
BMI	rs16867703	5	88799143	G	T	0.0137	1.4e-14	692118	0.3418	0.0198722	0.274112	1405	0.942217	0.987505	0.125852	0.157498	1367	0.424389	0.943145	0.242983	0.171796	1372	0.157482	0.978631	0.0166274	0.235679	1416	0.943765	0.984638	-0.0003634	0.200274	1386	0.998553	0.999322	0.174735	0.302996	1388	0.564243	0.991747
BMI	rs12595749	15	79432359	G	A	-0.0141	5.7e-16	692290	0.4631	-0.0937217	0.272705	1405	0.731143	0.973405	-0.0071876	0.156555	1367	0.963388	0.997005	0.165208	0.171248	1372	0.334852	0.978631	-0.136872	0.234665	1416	0.559808	0.966161	-0.000252	0.199713	1386	0.998993	0.999322	0.521477	0.301845	1388	0.0842791	0.991747
BMI	rs4677812	3	194863794	A	C	-0.0136	1.4e-12	691839	0.358	0.0622838	0.275757	1405	0.82134	0.975217	-0.011991	0.158443	1367	0.939685	0.997005	0.00982168	0.172421	1372	0.954583	0.996224	0.0270858	0.237087	1416	0.909061	0.984638	-0.0001901	0.201755	1386	0.999248	0.999322	0.165249	0.304615	1388	0.587571	0.991747
BMI	rs4237643	11	43648368	T	G	0.0223	4.3e-33	692491	0.3189	-0.150198	0.284989	1405	0.598257	0.948367	0.151263	0.163909	1367	0.35625	0.943145	-0.117311	0.178256	1372	0.510583	0.990772	-0.436337	0.243442	1416	0.0732892	0.966161	-0.0001765	0.207495	1386	0.999322	0.999322	-0.078782	0.31253	1388	0.801018	0.991747
BMI	rs284227	1	82379446	C	T	0.0147	3.5e-15	792227	0.2324	0.0551504	0.315058	1405	0.861067	0.981618	-0.219295	0.18049	1367	0.224578	0.943145	0.0608699	0.19793	1372	0.758485	0.990772	0.0380654	0.271038	1416	0.88833	0.982786	-0.0862765	0.229912	1386	0.707526	0.999254	0.305924	0.348986	1388	0.380853	0.991747
BMI	rs6827083	4	153075491	G	A	0.0097	4.8e-09	794577	0.3683	0.253608	0.274898	1405	0.3564	0.916639	-0.151498	0.158607	1367	0.339656	0.943145	0.194357	0.172528	1372	0.260142	0.978631	0.261236	0.235952	1416	0.268415	0.966161	0.0793945	0.201634	1386	0.693823	0.998624	-0.284158	0.304192	1388	0.350396	0.991747
BMI	rs2768950	4	49064487	A	G	0.0116	7.5e-10	754826	0.3083	-0.373583	0.318174	1405	0.240536	0.916639	0.0609588	0.183935	1367	0.740382	0.982546	0.220449	0.198886	1372	0.267878	0.978631	-0.340891	0.273811	1416	0.213344	0.966161	-0.0919349	0.234601	1386	0.695209	0.998624	0.0322287	0.351875	1388	0.927036	0.991747
BMI	rs1951455	14	91512339	T	C	-0.0145	4.5e-14	690040	0.2772	-0.194053	0.291579	1405	0.505824	0.916639	-0.0431765	0.167738	1367	0.796905	0.992591	0.139966	0.182862	1372	0.444155	0.990772	-0.207027	0.250335	1416	0.408378	0.966161	0.0831066	0.213153	1386	0.696678	0.998624	0.480227	0.321563	1388	0.135558	0.991747
BMI	rs10132280	14	25928179	A	C	-0.0223	5.6e-35	786578	0.3253	0.214288	0.279688	1405	0.443706	0.916639	-0.11167	0.160913	1367	0.487816	0.943145	-0.416918	0.175315	1372	0.0175394	0.92974	0.143073	0.240167	1416	0.551457	0.966161	-0.0796758	0.204513	1386	0.696902	0.998624	-0.0406262	0.30934	1388	0.895532	0.991747
BMI	rs9571687	13	67472713	A	C	-0.0129	2.8e-12	690974	0.3638	-0.0576644	0.278553	1405	0.836029	0.979776	0.105713	0.160516	1367	0.510278	0.943145	-0.105491	0.174135	1372	0.544751	0.990772	-0.0857719	0.238265	1416	0.718913	0.966161	-0.078157	0.20268	1386	0.699839	0.998624	-0.290746	0.306045	1388	0.342274	0.991747
BMI	rs1863652	4	95991417	A	G	-0.0115	1.4e-10	692539	0.3231	-0.166469	0.280526	1405	0.552999	0.935331	-0.244709	0.16083	1367	0.128359	0.943145	-0.180244	0.174988	1372	0.303176	0.978631	-0.27492	0.240583	1416	0.253349	0.966161	0.078247	0.204596	1386	0.702189	0.998624	0.242836	0.308281	1388	0.431002	0.991747
BMI	rs972283	7	130466854	A	G	0.0096	5.1e-09	795592	0.4078	-0.229633	0.26504	1405	0.386416	0.916639	0.256519	0.152697	1367	0.0932034	0.943145	0.0832338	0.166025	1372	0.616217	0.990772	-0.199216	0.226749	1416	0.379783	0.966161	-0.0737241	0.193462	1386	0.703205	0.998624	0.239285	0.291672	1388	0.412136	0.991747
BMI	rs7550711	1	110082886	T	C	0.0649	3.2e-38	769184	0.02583	-0.474083	0.885101	1405	0.592303	0.94719	0.563335	0.502038	1367	0.262021	0.943145	0.446447	0.551564	1372	0.418416	0.990772	-0.593138	0.75785	1416	0.433959	0.966161	0.24326	0.638785	1386	0.703398	0.998624	-0.160602	0.971726	1388	0.868752	0.991747
BMI	rs2282850	6	33267103	T	C	0.0135	5.5e-11	793987	0.1929	0.241928	0.318639	1405	0.447829	0.916639	0.0252907	0.184129	1367	0.890773	0.993871	0.0852337	0.199712	1372	0.669604	0.990772	-0.0708492	0.273318	1416	0.795504	0.968016	-0.0886705	0.233783	1386	0.704534	0.998624	0.279749	0.350566	1388	0.425012	0.991747
BMI	rs6968554	7	17287106	A	G	-0.01	3.5e-09	794218	0.4041	-0.342885	0.25943	1405	0.18649	0.916639	0.223419	0.148508	1367	0.132707	0.943145	-0.118678	0.163201	1372	0.467237	0.990772	0.0497029	0.222628	1416	0.823369	0.96912	0.0713255	0.188669	1386	0.705455	0.998624	-0.0778332	0.286638	1388	0.786018	0.991747
BMI	rs10942267	5	80841914	G	A	-0.0156	3.9e-17	689084	0.3401	-0.0795722	0.28078	1405	0.776915	0.973405	0.0518486	0.16098	1367	0.747441	0.982546	0.1929	0.175361	1372	0.27152	0.978631	-0.284911	0.240923	1416	0.237177	0.966161	0.0773922	0.204807	1386	0.705579	0.998624	-0.0455548	0.309499	1388	0.883005	0.991747
BMI	rs7903146	10	114758349	T	C	-0.0181	1.3e-23	795624	0.3464	-0.336387	0.274754	1405	0.221039	0.916639	0.00682865	0.157894	1367	0.96551	0.997005	0.0832565	0.172013	1372	0.628455	0.990772	-0.165214	0.236248	1416	0.484466	0.966161	-0.0758652	0.200941	1386	0.705823	0.998624	-0.284278	0.303483	1388	0.349067	0.991747
BMI	rs11659764	18	53335512	A	T	-0.0253	8.9e-11	690582	0.03972	-0.519841	0.689442	1405	0.450975	0.916639	0.541981	0.396224	1367	0.171582	0.943145	-0.18224	0.432177	1372	0.673325	0.990772	-0.709634	0.591889	1416	0.230757	0.966161	-0.190729	0.505426	1386	0.705962	0.998624	-0.881046	0.762599	1388	0.24816	0.991747
BMI	rs4082793	14	99700080	T	C	-0.0122	3.6e-12	686991	0.3383	0.232014	0.2923	1405	0.427475	0.916639	-0.158428	0.168517	1367	0.347318	0.943145	-0.190471	0.18326	1372	0.298827	0.978631	0.187195	0.25106	1416	0.456023	0.966161	0.0852803	0.214561	1386	0.691087	0.998113	0.480703	0.323078	1388	0.13701	0.991747
BMI	rs284262	1	10743363	T	C	0.0099	2.6e-08	643552	0.4367	-0.161424	0.299794	1405	0.590354	0.94719	0.0694227	0.172957	1367	0.688198	0.97304	-0.134965	0.18804	1372	0.473037	0.990772	-0.0607182	0.257506	1416	0.813628	0.96912	-0.0903339	0.219745	1386	0.681074	0.994931	-0.175785	0.331829	1388	0.596373	0.991747
BMI	rs10920678	1	190239907	A	G	0.0155	1.5e-21	788624	0.3887	-0.16971	0.286079	1405	0.553125	0.935331	-0.0074918	0.164533	1367	0.963689	0.997005	0.2216	0.178929	1372	0.215752	0.978631	-0.217804	0.246197	1416	0.376485	0.966161	0.0851865	0.209673	1386	0.684598	0.994931	0.0457565	0.31615	1388	0.884945	0.991747
BMI	rs6011457	20	61530915	T	A	0.0116	2.7e-11	690692	0.4166	0.148305	0.265543	1405	0.576596	0.94719	-0.118126	0.153157	1367	0.440678	0.943145	0.11319	0.165897	1372	0.495174	0.990772	0.0159624	0.228083	1416	0.944216	0.984638	-0.0790908	0.19468	1386	0.684615	0.994931	-0.209434	0.292624	1388	0.474292	0.991747
BMI	rs11084553	19	31019780	G	A	-0.021	1.8e-18	691103	0.1066	-0.126961	0.451122	1405	0.778419	0.973405	0.0858219	0.26283	1367	0.744074	0.982546	-0.0467504	0.284581	1372	0.869537	0.993096	0.183913	0.387148	1416	0.634828	0.966161	0.133759	0.330145	1386	0.68543	0.994931	-0.110527	0.502019	1388	0.825776	0.991747
BMI	rs460799	5	66191971	A	G	-0.0118	6.4e-10	690884	0.2826	-0.027397	0.298312	1405	0.926838	0.985293	0.189171	0.171486	1367	0.270167	0.943145	0.0252252	0.187435	1372	0.892963	0.996224	0.0925653	0.256416	1416	0.718156	0.966161	-0.088453	0.218581	1386	0.685783	0.994931	-0.050888	0.330441	1388	0.877632	0.991747
BMI	rs4858193	3	20441050	C	T	-0.0129	1.6e-11	686850	0.2203	0.306186	0.332972	1405	0.357965	0.916639	-0.128903	0.191917	1367	0.501916	0.943145	-0.201527	0.208792	1372	0.334615	0.978631	0.332713	0.286051	1416	0.244975	0.966161	0.0984723	0.243797	1386	0.686342	0.994931	-0.349327	0.368561	1388	0.343391	0.991747
BMI	rs2051559	4	3298800	C	T	0.0176	5e-12	689307	0.1353	0.200332	0.364068	1405	0.582231	0.94719	0.342267	0.208876	1367	0.101527	0.943145	-0.111022	0.227002	1372	0.624863	0.990772	0.400373	0.312927	1416	0.200952	0.966161	0.107045	0.266205	1386	0.687662	0.994931	-0.16198	0.400813	1388	0.686181	0.991747
BMI	rs4676084	2	110010962	A	G	0.0098	1.8e-08	685747	0.3401	-0.0910455	0.289936	1405	0.753554	0.973405	-0.168704	0.166561	1367	0.311307	0.943145	-0.0133042	0.181284	1372	0.941508	0.996224	0.101293	0.249001	1416	0.68422	0.966161	0.0850726	0.211641	1386	0.687771	0.994931	-0.318437	0.319656	1388	0.319334	0.991747
BMI	rs355777	3	154034950	C	G	0.0153	1.4e-18	689978	0.4166	-0.239691	0.264281	1405	0.364587	0.916639	0.235487	0.151852	1367	0.121192	0.943145	0.0142416	0.165041	1372	0.931248	0.996224	-0.275059	0.226792	1416	0.2254	0.966161	-0.0804563	0.192964	1386	0.67678	0.992644	0.2564	0.291013	1388	0.378439	0.991747
BMI	rs2023671	16	23849839	G	T	0.0122	5.8e-10	691845	0.2488	0.296023	0.30274	1405	0.328336	0.916639	0.0219132	0.1741	1367	0.899857	0.993871	0.00551141	0.189069	1372	0.976749	0.997535	0.459606	0.260338	1416	0.0777102	0.966161	0.0923811	0.221948	1386	0.677308	0.992644	-0.306571	0.334034	1388	0.358892	0.991747
BMI	rs6985109	8	10761585	G	A	0.0177	1.5e-26	793993	0.4912	-0.175345	0.260618	1405	0.501183	0.916639	-0.216466	0.15002	1367	0.149277	0.943145	-0.0200474	0.163521	1372	0.902443	0.996224	-0.200349	0.223961	1416	0.371169	0.966161	0.0804465	0.191041	1386	0.67375	0.991614	0.309944	0.288128	1388	0.282242	0.991747
BMI	rs6477694	9	111932342	C	T	0.0123	3.8e-13	789230	0.3686	-0.0867954	0.267701	1405	0.745816	0.973405	-0.133837	0.153619	1367	0.383785	0.943145	0.278785	0.168071	1372	0.0974011	0.978631	0.133014	0.230191	1416	0.563463	0.966161	0.0821619	0.195519	1386	0.674386	0.991614	0.384829	0.296388	1388	0.194369	0.991747
BMI	rs10499276	6	154309808	T	C	0.0172	2.2e-12	794584	0.1185	0.126038	0.397336	1405	0.751134	0.973405	-0.417461	0.227492	1367	0.0667167	0.943145	-0.23544	0.249705	1372	0.345914	0.978631	0.258421	0.341401	1416	0.449211	0.966161	-0.126472	0.29027	1386	0.663119	0.978941	-0.0811151	0.44088	1388	0.854053	0.991747
BMI	rs879620	16	4015729	C	T	-0.0231	5.3e-38	688377	0.4835	-0.237293	0.275473	1405	0.389165	0.916639	0.0165562	0.15833	1367	0.916734	0.993871	0.0813304	0.172659	1372	0.637684	0.990772	-0.307272	0.236468	1416	0.194013	0.966161	0.087668	0.201502	1386	0.663578	0.978941	-0.156447	0.304316	1388	0.607269	0.991747
BMI	rs6564360	16	76779612	G	A	0.0135	1.2e-09	690911	0.2006	0.617059	0.313383	1405	0.0491482	0.875461	0.165094	0.180416	1367	0.360314	0.943145	0.251456	0.19717	1372	0.202412	0.978631	0.293126	0.269882	1416	0.277609	0.966161	0.100755	0.229417	1386	0.6606	0.977776	-0.272072	0.34811	1388	0.434602	0.991747
BMI	rs2279620	17	7792465	C	G	0.017	1.6e-09	674410	0.09725	0.345865	0.470065	1405	0.461987	0.916639	0.0401961	0.271771	1367	0.88244	0.993871	0.341909	0.294036	1372	0.24511	0.978631	0.353762	0.404075	1416	0.38146	0.966161	0.154982	0.346264	1386	0.654523	0.975002	-0.691008	0.519225	1388	0.18346	0.991747
BMI	rs13209968	6	126089285	C	G	0.0114	3.1e-11	692069	0.4645	-0.300925	0.25913	1405	0.245723	0.916639	0.11969	0.149199	1367	0.422566	0.943145	0.107725	0.162058	1372	0.506334	0.990772	-0.237805	0.22267	1416	0.285716	0.966161	0.0847521	0.189847	1386	0.655362	0.975002	-0.0103471	0.285451	1388	0.97109	0.991747
BMI	rs12885454	14	29736838	A	C	-0.0185	2.4e-27	793069	0.2872	0.200109	0.284466	1405	0.48189	0.916639	-0.131401	0.163936	1367	0.422959	0.943145	-0.221409	0.177643	1372	0.212845	0.978631	-0.127227	0.244325	1416	0.602637	0.966161	-0.0928626	0.208284	1386	0.655778	0.975002	0.0126971	0.313419	1388	0.967691	0.991747
BMI	rs1993709	1	72838529	A	G	-0.0331	1.9e-57	786001	0.1429	-0.859154	0.370674	1405	0.0206037	0.757624	0.0152865	0.213171	1367	0.942844	0.997005	-0.260757	0.231998	1372	0.261227	0.978631	-0.901871	0.31878	1416	0.0047338	0.966161	-0.120998	0.271899	1386	0.656382	0.975002	-0.621178	0.409847	1388	0.129842	0.991747
BMI	rs2269828	12	47471439	A	G	-0.0105	4.4e-09	781589	0.278	-0.113607	0.28674	1405	0.692016	0.973238	-0.301549	0.165117	1367	0.0680292	0.943145	-0.155831	0.179799	1372	0.386261	0.984915	-0.288175	0.246369	1416	0.242325	0.966161	0.0932094	0.210039	1386	0.657277	0.975002	0.363106	0.316269	1388	0.25113	0.991747
BMI	rs6448587	4	28561990	C	A	-0.0167	2.3e-13	691097	0.2024	0.0933455	0.322353	1405	0.772184	0.973405	0.290169	0.185889	1367	0.118762	0.943145	0.254681	0.202234	1372	0.208125	0.978631	-0.0604055	0.276647	1416	0.827189	0.96912	-0.104854	0.236543	1386	0.657636	0.975002	-0.0274989	0.356436	1388	0.938516	0.991747
BMI	rs3803286	14	103246470	A	G	0.0181	4.1e-23	691435	0.4333	-0.220295	0.268632	1405	0.41232	0.916639	0.259368	0.153936	1367	0.0922363	0.943145	0.224209	0.167628	1372	0.181272	0.978631	-0.131466	0.23107	1416	0.569485	0.966161	-0.0888719	0.196207	1386	0.650657	0.974351	-0.279061	0.296206	1388	0.346298	0.991747
BMI	rs9927139	16	77281628	G	C	0.0154	4e-09	689913	0.1375	0.523797	0.388982	1405	0.178333	0.916639	0.260766	0.222956	1367	0.242376	0.943145	-0.118844	0.243801	1372	0.626009	0.990772	0.221382	0.334365	1416	0.508018	0.966161	-0.130683	0.2841	1386	0.645598	0.97081	-0.270287	0.429942	1388	0.529676	0.991747
BMI	rs663129	18	57838401	A	G	0.0545	1.6e-178	788948	0.2437	-0.225676	0.301825	1405	0.454764	0.916639	-0.0708972	0.172571	1367	0.681263	0.972051	-0.193383	0.188888	1372	0.306112	0.978631	-0.068911	0.259628	1416	0.790723	0.966317	0.10094	0.220048	1386	0.646508	0.97081	-0.0542361	0.333921	1388	0.870997	0.991747
BMI	rs10824218	10	76421216	T	A	-0.0122	7.2e-12	669278	0.3826	-0.569919	0.287437	1405	0.0475902	0.869587	-0.191353	0.165712	1367	0.248404	0.943145	-0.292925	0.180577	1372	0.105001	0.978631	-0.189088	0.247218	1416	0.444482	0.966161	-0.0962107	0.210183	1386	0.647206	0.97081	-0.418932	0.318077	1388	0.188032	0.991747
BMI	rs1884389	20	1410582	T	C	-0.0103	4e-09	683669	0.4318	-0.365992	0.266483	1405	0.169845	0.916639	-0.0345217	0.153177	1367	0.821725	0.993871	0.0840282	0.167275	1372	0.615513	0.990772	0.108218	0.229251	1416	0.636966	0.966161	0.0891361	0.194728	1386	0.647207	0.97081	0.461865	0.294115	1388	0.116563	0.991747
BMI	rs9349239	6	42676480	A	G	0.0122	1.3e-12	687917	0.4802	-0.185687	0.273183	1405	0.496798	0.916639	-0.0859768	0.157111	1367	0.584307	0.952555	0.0696858	0.171525	1372	0.684608	0.990772	-0.179797	0.234214	1416	0.442817	0.966161	-0.0929797	0.199375	1386	0.641035	0.969468	0.0802129	0.301733	1388	0.790402	0.991747
BMI	rs2959592	8	17002725	C	T	-0.0118	2.3e-08	762826	0.2517	0.105871	0.304952	1405	0.728514	0.973405	-0.111643	0.175442	1367	0.524656	0.943145	-0.204285	0.190435	1372	0.283585	0.978631	0.187925	0.262078	1416	0.473458	0.966161	0.103966	0.222947	1386	0.641056	0.969468	0.290516	0.336	1388	0.387391	0.991747
BMI	rs4556997	2	100814858	A	C	0.0197	6.9e-17	792972	0.1625	0.166833	0.358653	1405	0.641885	0.959084	-0.471114	0.205544	1367	0.022057	0.795942	-0.467476	0.224898	1372	0.0378404	0.92974	-0.020413	0.306942	1416	0.946986	0.984638	-0.121507	0.261281	1386	0.641974	0.969468	-0.10943	0.395566	1388	0.782097	0.991747
BMI	rs7535528	1	2444414	A	G	-0.0152	1.4e-16	632868	0.3029	-0.235194	0.300798	1405	0.434405	0.916639	-0.165191	0.172423	1367	0.338206	0.943145	-0.362005	0.188114	1372	0.0545147	0.92974	-0.544792	0.258278	1416	0.0350935	0.966161	0.104827	0.219922	1386	0.633684	0.968351	0.57797	0.331927	1388	0.0818619	0.991747
BMI	rs10929925	2	6155557	A	C	-0.0143	1.8e-18	787036	0.456	-0.200504	0.269606	1405	0.457188	0.916639	0.0684658	0.154733	1367	0.658214	0.968423	0.181123	0.168985	1372	0.283986	0.978631	-0.24013	0.231055	1416	0.298854	0.966161	-0.093304	0.196656	1386	0.635253	0.968351	-0.486135	0.296694	1388	0.101545	0.991747
BMI	rs11889536	2	220163543	G	A	-0.0189	6.4e-15	688977	0.1948	-0.2228	0.350478	1405	0.525074	0.923132	-0.485546	0.200414	1367	0.0155356	0.730181	-0.217234	0.219504	1372	0.322517	0.978631	-0.507934	0.300191	1416	0.090861	0.966161	0.120951	0.255064	1386	0.635434	0.968351	0.308914	0.38649	1388	0.424266	0.991747
BMI	rs6556301	5	176527577	T	G	-0.0111	4.1e-10	734744	0.3344	-0.0354516	0.274534	1405	0.89727	0.98481	0.36593	0.157653	1367	0.0204288	0.79406	0.205806	0.171436	1372	0.230163	0.978631	-0.292094	0.235777	1416	0.215605	0.966161	0.0950472	0.200988	1386	0.636359	0.968351	-0.326392	0.301968	1388	0.279938	0.991747
BMI	rs10066835	5	151254297	T	C	0.0428	6.5e-09	662130	0.02321	0.864842	0.81941	1405	0.291405	0.916639	0.551829	0.474677	1367	0.245223	0.943145	0.340938	0.511514	1372	0.505188	0.990772	1.34955	0.701841	1416	0.0546988	0.966161	0.28265	0.600427	1386	0.637895	0.968351	-1.17277	0.900959	1388	0.19324	0.991747
BMI	rs2012502	16	81728081	A	C	0.0113	4.2e-11	783779	0.3735	-0.295941	0.271859	1405	0.276527	0.916639	-0.0220135	0.156559	1367	0.8882	0.993871	0.027847	0.170565	1372	0.870335	0.993096	0.03692	0.233858	1416	0.874579	0.982786	0.0937214	0.199144	1386	0.637985	0.968351	0.380777	0.300001	1388	0.204565	0.991747
BMI	rs2619976	17	71754545	T	C	0.0104	6.3e-09	684417	0.3902	0.0261869	0.286162	1405	0.9271	0.985293	-0.0880981	0.164639	1367	0.592669	0.952555	-0.0393865	0.178472	1372	0.82537	0.990772	-0.145331	0.245965	1416	0.55471	0.966161	0.245014	0.20922	1386	0.24177	0.967971	0.162971	0.315163	1388	0.605169	0.991747
BMI	rs1885728	6	5977833	G	A	-0.0108	1e-08	682316	0.3799	-0.118925	0.269778	1405	0.659407	0.965048	-0.0211313	0.15551	1367	0.891933	0.993871	0.149049	0.169199	1372	0.378525	0.984915	-0.0871701	0.231752	1416	0.706874	0.966161	0.230155	0.197396	1386	0.243835	0.967971	0.238082	0.298598	1388	0.425395	0.991747
BMI	rs1883776	1	77421888	A	G	0.0171	1.4e-08	664381	0.04577	-0.141915	0.697626	1405	0.838832	0.979806	0.0441503	0.398874	1367	0.911881	0.993871	0.137502	0.432363	1372	0.750516	0.990772	-0.326978	0.601133	1416	0.586571	0.966161	0.592109	0.509769	1386	0.245631	0.967971	0.590927	0.765939	1388	0.440539	0.991747
BMI	rs2809395	9	120902240	T	A	-0.0135	2.2e-09	682625	0.2836	-0.258864	0.314529	1405	0.410638	0.916639	0.027481	0.182219	1367	0.880146	0.993871	0.0401912	0.197347	1372	0.838651	0.990772	-0.121327	0.270474	1416	0.65381	0.966161	-0.26887	0.23174	1386	0.246161	0.967971	-0.275867	0.347453	1388	0.427351	0.991747
BMI	rs244418	16	69622762	A	G	-0.0207	1.3e-32	691205	0.3717	-0.117723	0.275048	1405	0.668712	0.965048	0.0628188	0.1589	1367	0.692658	0.97304	0.146182	0.17236	1372	0.39652	0.984915	-0.111386	0.236677	1416	0.637983	0.966161	-0.232902	0.201689	1386	0.248391	0.967971	-0.51878	0.304286	1388	0.0884377	0.991747
BMI	rs3800229	6	108996963	G	T	-0.0175	1.4e-22	792474	0.3857	0.296325	0.289283	1405	0.305851	0.916639	0.11184	0.166156	1367	0.500998	0.943145	0.254896	0.181262	1372	0.159885	0.978631	0.356267	0.248931	1416	0.152599	0.966161	-0.24379	0.211442	1386	0.249115	0.967971	-0.300974	0.32056	1388	0.347947	0.991747
BMI	rs1199334	3	138091140	A	G	0.0142	7.3e-12	793336	0.1886	-0.0308772	0.326243	1405	0.924611	0.985293	0.0299852	0.186881	1367	0.87255	0.993871	0.313648	0.203098	1372	0.122746	0.978631	-0.201468	0.280463	1416	0.472667	0.966161	0.272253	0.237817	1386	0.252491	0.967971	-0.180273	0.359045	1388	0.615684	0.991747
BMI	rs12053103	2	59540594	A	G	0.0118	1e-12	792931	0.3853	0.00264499	0.260638	1405	0.991905	0.996363	0.206065	0.149997	1367	0.169735	0.943145	0.0103491	0.163076	1372	0.949408	0.996224	0.116585	0.224114	1416	0.603004	0.966161	0.218643	0.191289	1386	0.253238	0.967971	0.488518	0.287654	1388	0.0896802	0.991747
BMI	rs10915840	1	225668524	A	G	-0.0118	1.3e-09	684857	0.2298	-0.434732	0.35474	1405	0.220596	0.916639	0.14988	0.203715	1367	0.462019	0.943145	0.0883701	0.222854	1372	0.69177	0.990772	-0.453026	0.30413	1416	0.13656	0.966161	0.294268	0.258621	1386	0.255388	0.967971	0.548702	0.390469	1388	0.160176	0.991747
BMI	rs998732	19	19378671	G	A	-0.0171	2e-14	793852	0.1589	-0.27193	0.378045	1405	0.472074	0.916639	0.25909	0.218405	1367	0.235719	0.943145	0.100789	0.235946	1372	0.669325	0.990772	-0.21164	0.324841	1416	0.514818	0.966161	0.313841	0.276759	1386	0.256998	0.967971	0.374014	0.416052	1388	0.368832	0.991747
BMI	rs2481665	1	62594677	C	T	-0.0161	7.2e-23	795247	0.3475	0.2365	0.275219	1405	0.390315	0.916639	-0.250316	0.158169	1367	0.113749	0.943145	-0.191287	0.173124	1372	0.269394	0.978631	-0.111547	0.236351	1416	0.637034	0.966161	0.227594	0.200977	1386	0.257647	0.967971	-0.0072245	0.304511	1388	0.981076	0.991747
BMI	rs16940823	18	22137319	A	C	-0.0146	9e-11	684252	0.1548	-0.137995	0.370727	1405	0.709779	0.973405	-0.0211939	0.214089	1367	0.921156	0.993871	-0.655502	0.230181	1372	0.00446904	0.799064	0.183618	0.317627	1416	0.563293	0.966161	-0.303819	0.270639	1386	0.261804	0.967971	-0.2728	0.406139	1388	0.501894	0.991747
BMI	rs10938397	4	45182527	G	A	0.0324	3.4e-86	793518	0.4006	0.364685	0.259685	1405	0.160441	0.916639	-0.0059448	0.149228	1367	0.968229	0.997005	0.376067	0.162175	1372	0.0205488	0.92974	0.242273	0.223245	1416	0.278005	0.966161	-0.21191	0.189642	1386	0.264008	0.967971	-0.252505	0.287045	1388	0.37919	0.991747
BMI	rs16864515	1	171435542	A	C	0.0186	1.7e-10	690508	0.09987	-0.50678	0.427722	1405	0.236284	0.916639	0.0743728	0.248169	1367	0.764462	0.982546	0.0676005	0.269295	1372	0.80183	0.990772	-0.66133	0.368138	1416	0.0726426	0.966161	0.35327	0.316158	1386	0.264025	0.967971	0.73477	0.476193	1388	0.123059	0.991747
BMI	rs310618	20	62127121	C	T	0.0108	5.5e-09	709614	0.4348	-0.262706	0.302628	1405	0.385498	0.916639	-0.302235	0.174219	1367	0.0830034	0.943145	-0.208766	0.189813	1372	0.271591	0.978631	0.123247	0.259579	1416	0.635007	0.966161	-0.246519	0.220985	1386	0.264812	0.967971	-0.506467	0.333511	1388	0.129096	0.991747
BMI	rs17201143	20	50402079	T	C	-0.0103	2.6e-08	691867	0.265	0.0687709	0.298664	1405	0.817922	0.975217	-0.176432	0.172113	1367	0.305501	0.943145	-0.183356	0.186847	1372	0.32661	0.978631	0.181647	0.256936	1416	0.479701	0.966161	-0.243002	0.218931	1386	0.267215	0.967971	-0.218691	0.329591	1388	0.507108	0.991747
BMI	rs9387640	6	119508871	T	C	-0.0119	4.3e-12	783371	0.3897	0.238619	0.267492	1405	0.372514	0.916639	0.20169	0.154048	1367	0.190667	0.943145	0.0819532	0.167858	1372	0.625465	0.990772	0.327587	0.230189	1416	0.154924	0.966161	-0.217532	0.196159	1386	0.267642	0.967971	-0.208838	0.296642	1388	0.481548	0.991747
BMI	rs2440452	8	6264879	T	G	0.0142	4.3e-08	692117	0.2311	-0.674867	0.348143	1405	0.0527668	0.875461	-0.285624	0.199846	1367	0.153173	0.943145	-0.416927	0.218122	1372	0.0561588	0.92974	-0.176069	0.297984	1416	0.554703	0.966161	-0.279981	0.252979	1386	0.268602	0.967971	-0.324889	0.382735	1388	0.396107	0.991747
BMI	rs849135	7	28196413	A	G	0.0109	2e-11	793909	0.4222	0.0128932	0.262723	1405	0.960866	0.992802	-0.266237	0.150816	1367	0.0777373	0.943145	-0.160217	0.165241	1372	0.332421	0.978631	-0.357259	0.225314	1416	0.113055	0.966161	0.211449	0.191484	1386	0.269671	0.967971	0.210939	0.291036	1388	0.468706	0.991747
BMI	rs7615297	3	156299313	G	C	-0.0149	5.7e-10	689710	0.1533	0.643745	0.358713	1405	0.0729348	0.875461	-0.0316344	0.205438	1367	0.877644	0.993871	0.0993074	0.224503	1372	0.658311	0.990772	0.378765	0.308503	1416	0.219745	0.966161	-0.287919	0.261186	1386	0.270502	0.967971	-0.407922	0.396036	1388	0.303185	0.991747
BMI	rs9964756	18	50441817	T	G	-0.0164	2.9e-09	691906	0.1265	-0.261521	0.410556	1405	0.524235	0.923132	0.0791749	0.237193	1367	0.738582	0.982546	0.0744285	0.25712	1372	0.772266	0.990772	-0.0337842	0.352617	1416	0.923685	0.984638	0.331682	0.301291	1386	0.271146	0.967971	0.281801	0.453196	1388	0.534171	0.991747
BMI	rs2371767	3	64718258	C	G	0.0107	6.2e-09	768041	0.3217	0.0520826	0.289228	1405	0.85712	0.981618	0.0880673	0.166357	1367	0.596623	0.952555	-0.0245101	0.180625	1372	0.892082	0.996224	0.184323	0.248531	1416	0.458422	0.966161	-0.232302	0.211369	1386	0.271945	0.967971	0.398398	0.318596	1388	0.211336	0.991747
BMI	rs1150659	6	26100023	A	G	-0.0139	3.8e-13	790405	0.2112	0.171414	0.315501	1405	0.587005	0.94719	0.210769	0.180955	1367	0.244324	0.943145	-0.0656484	0.197233	1372	0.739301	0.990772	0.26657	0.270702	1416	0.324922	0.966161	0.251871	0.230171	1386	0.274024	0.967971	0.333305	0.346764	1388	0.336628	0.991747
BMI	rs10071816	5	112889374	A	G	0.0123	2.4e-08	685172	0.2901	-0.0287009	0.316194	1405	0.927689	0.985293	0.147169	0.182264	1367	0.419548	0.943145	0.403313	0.198513	1372	0.0423814	0.92974	-0.28873	0.272101	1416	0.288821	0.966161	0.252453	0.231924	1386	0.276558	0.967971	0.0306091	0.35128	1388	0.930576	0.991747
BMI	rs17536077	2	50735998	C	G	-0.0127	7.9e-13	687382	0.3249	0.274974	0.28223	1405	0.330081	0.916639	0.118538	0.162277	1367	0.465231	0.943145	-0.0568804	0.17731	1372	0.748415	0.990772	0.653611	0.24164	1416	0.00691517	0.966161	-0.223194	0.206035	1386	0.278873	0.967971	-0.592579	0.311304	1388	0.0571789	0.991747
BMI	rs2185027	6	153381622	C	A	0.0135	5e-14	791606	0.363	-0.294992	0.274094	1405	0.282006	0.916639	-0.0027357	0.157979	1367	0.986186	0.997005	0.177775	0.172129	1372	0.30188	0.978631	0.161491	0.235079	1416	0.492217	0.966161	0.216488	0.200117	1386	0.279527	0.967971	0.0809876	0.303003	1388	0.789291	0.991747
BMI	rs10889550	1	65906067	G	A	0.0243	1.9e-09	776629	0.09366	0.351686	0.465804	1405	0.450372	0.916639	0.263981	0.267595	1367	0.324067	0.943145	0.28027	0.291269	1372	0.336103	0.978631	0.401489	0.400244	1416	0.315979	0.966161	0.366485	0.34021	1386	0.281566	0.967971	-0.325354	0.5132	1388	0.526205	0.991747
BMI	rs13329567	15	68104367	T	C	-0.0293	1e-50	793953	0.2976	-0.476242	0.30379	1405	0.117186	0.87976	0.00677435	0.175944	1367	0.969292	0.997005	0.295502	0.189613	1372	0.119362	0.978631	-0.348664	0.260119	1416	0.180332	0.966161	0.239439	0.222533	1386	0.282128	0.967971	0.0401366	0.333515	1388	0.904228	0.991747
BMI	rs10923724	1	119546842	C	T	0.0118	6.4e-13	789514	0.4694	-0.106928	0.265762	1405	0.687491	0.969427	-0.129329	0.15309	1367	0.398377	0.943145	-0.147829	0.165629	1372	0.372268	0.984915	-0.0183963	0.22832	1416	0.935793	0.984638	-0.208561	0.194295	1386	0.283271	0.967971	-0.198627	0.29242	1388	0.497093	0.991747
BMI	rs9296723	6	53752062	C	T	0.0106	4e-09	690691	0.4052	0.00117533	0.262113	1405	0.996423	0.99775	0.0461901	0.150861	1367	0.759517	0.982546	0.026727	0.16474	1372	0.871143	0.993096	-0.174678	0.225136	1416	0.43795	0.966161	-0.205036	0.191595	1386	0.284739	0.967971	-0.12146	0.290345	1388	0.675771	0.991747
BMI	rs8033995	15	44013509	C	G	-0.0166	1.4e-08	692600	0.1419	0.315625	0.397842	1405	0.427714	0.916639	0.0230563	0.228366	1367	0.919596	0.993871	0.31613	0.248429	1372	0.203408	0.978631	0.107942	0.342785	1416	0.752887	0.966161	0.311553	0.291206	1386	0.284865	0.967971	0.560887	0.439318	1388	0.201916	0.991747
BMI	rs11712367	3	50775446	C	T	-0.0156	1.2e-10	692497	0.2182	-0.144562	0.324234	1405	0.65577	0.965048	0.169098	0.186305	1367	0.364229	0.943145	0.0775832	0.203982	1372	0.70375	0.990772	-0.0054884	0.278515	1416	0.984281	0.990931	-0.252758	0.237067	1386	0.286527	0.967971	-0.589515	0.3574	1388	0.0992834	0.991747
BMI	rs925421	4	60253877	A	G	0.0116	5.8e-09	674423	0.2954	0.257811	0.288307	1405	0.371356	0.916639	-0.214434	0.166807	1367	0.198829	0.943145	-0.39052	0.180385	1372	0.0305671	0.92974	0.631167	0.246997	1416	0.0107124	0.966161	-0.225716	0.211717	1386	0.286556	0.967971	0.266579	0.318481	1388	0.402719	0.991747
BMI	rs4686682	3	185307402	T	C	-0.011	4.5e-08	625243	0.2744	-0.0759892	0.294247	1405	0.796253	0.973405	0.0917732	0.169185	1367	0.587603	0.952555	0.121227	0.184381	1372	0.510984	0.990772	0.122562	0.252885	1416	0.627996	0.966161	-0.229258	0.215349	1386	0.28725	0.967971	-0.391332	0.325271	1388	0.229146	0.991747
BMI	rs6841761	4	25423538	T	G	-0.0131	6.4e-16	793477	0.473	-0.172434	0.287323	1405	0.548509	0.935331	0.166728	0.165824	1367	0.314859	0.943145	-0.193034	0.180359	1372	0.284684	0.978631	-0.217038	0.247435	1416	0.380554	0.966161	-0.225049	0.211437	1386	0.287344	0.967971	0.288721	0.318775	1388	0.365242	0.991747
BMI	rs6852276	4	145261999	G	A	0.0108	8.5e-11	781303	0.4068	0.596387	0.271077	1405	0.027966	0.757624	0.0235943	0.156675	1367	0.880319	0.993871	-0.0509549	0.170043	1372	0.764483	0.990772	0.383288	0.232469	1416	0.0994188	0.966161	0.208239	0.198308	1386	0.293867	0.967971	0.15125	0.298972	1388	0.613007	0.991747
BMI	rs1260326	2	27730940	T	C	-0.0105	3.9e-10	784462	0.3517	0.132618	0.277969	1405	0.63337	0.956474	-0.123702	0.159637	1367	0.438536	0.943145	-0.287393	0.173776	1372	0.0983964	0.978631	-0.118228	0.238042	1416	0.619502	0.966161	0.212474	0.202357	1386	0.293905	0.967971	-0.0765706	0.306125	1388	0.802525	0.991747
BMI	rs6676084	1	197094030	T	C	-0.0122	4.9e-12	786902	0.2797	0.498699	0.29847	1405	0.094975	0.875461	0.259808	0.171675	1367	0.130419	0.943145	0.0617122	0.187983	1372	0.742745	0.990772	0.153118	0.256407	1416	0.550491	0.966161	0.228358	0.217846	1386	0.294704	0.967971	0.366801	0.330376	1388	0.267085	0.991747
BMI	rs7519259	1	66434743	A	G	0.0125	3.8e-13	681362	0.4619	0.0539343	0.282353	1405	0.84854	0.981618	0.12154	0.163419	1367	0.457168	0.943145	-0.242956	0.176986	1372	0.17006	0.978631	-0.241448	0.242187	1416	0.318962	0.966161	0.216138	0.207161	1386	0.296978	0.967971	-0.201024	0.311154	1388	0.518349	0.991747
BMI	rs11915371	3	70539559	C	A	0.0149	2.6e-12	690829	0.2279	-0.304768	0.313507	1405	0.331157	0.916639	-0.0540128	0.180331	1367	0.764588	0.982546	-0.168604	0.19633	1372	0.390612	0.984915	-0.0284846	0.269349	1416	0.915793	0.984638	0.237698	0.229383	1386	0.300268	0.967971	0.547923	0.345797	1388	0.113304	0.991747
BMI	rs11228824	11	56634316	A	G	-0.0128	7.6e-09	679916	0.1731	-0.115839	0.339866	1405	0.733278	0.973405	0.26066	0.195826	1367	0.183387	0.943145	0.209707	0.212191	1372	0.323185	0.978631	-0.369774	0.291473	1416	0.20478	0.966161	-0.257328	0.248998	1386	0.301573	0.967971	-0.601568	0.373329	1388	0.10733	0.991747
BMI	rs4740619	9	15634326	C	T	-0.0186	2.3e-30	794491	0.4895	0.552966	0.253489	1405	0.0293189	0.763984	-0.157423	0.146001	1367	0.281122	0.943145	-0.175413	0.158803	1372	0.269533	0.978631	0.317856	0.218409	1416	0.145803	0.966161	-0.191817	0.185852	1386	0.302209	0.967971	0.0109403	0.280965	1388	0.968945	0.991747
BMI	rs2634047	8	85696337	C	G	-0.0149	2.5e-13	683222	0.2517	0.0544115	0.315345	1405	0.863033	0.981618	-0.0179848	0.182112	1367	0.921346	0.993871	-0.266313	0.197417	1372	0.177566	0.978631	-0.272399	0.270772	1416	0.314586	0.966161	-0.237371	0.230596	1386	0.303482	0.967971	-0.0174106	0.348596	1388	0.960174	0.991747
BMI	rs2143253	20	41987392	A	G	-0.0188	1.1e-12	684760	0.214	-0.476946	0.347689	1405	0.170359	0.916639	0.241935	0.199813	1367	0.226181	0.943145	0.28064	0.218503	1372	0.199231	0.978631	-0.0784442	0.298363	1416	0.792655	0.966757	0.261033	0.253711	1386	0.303726	0.967971	0.429799	0.383901	1388	0.263098	0.991747
BMI	rs2174307	9	73791849	C	G	0.0121	4.9e-12	686559	0.4163	-0.0813982	0.266958	1405	0.76048	0.973405	-0.416285	0.152441	1367	0.00640047	0.644967	-0.200741	0.166926	1372	0.22935	0.978631	0.0804015	0.229378	1416	0.726001	0.966161	0.199444	0.194706	1386	0.305857	0.967971	-0.0656745	0.294655	1388	0.823657	0.991747
BMI	rs17776719	3	11640481	G	A	0.0167	1.7e-11	688708	0.1419	0.261776	0.371048	1405	0.480614	0.916639	0.596105	0.213488	1367	0.00530857	0.644967	0.140419	0.232881	1372	0.546632	0.990772	-0.0589384	0.319464	1416	0.853655	0.978015	-0.279041	0.272603	1386	0.306197	0.967971	0.413484	0.411512	1388	0.315174	0.991747
BMI	rs2516739	16	2097158	A	G	-0.0159	1.4e-14	761216	0.2506	-0.295687	0.311837	1405	0.343186	0.916639	-0.255484	0.178558	1367	0.152714	0.943145	0.080998	0.194573	1372	0.677266	0.990772	-0.101502	0.268577	1416	0.705544	0.966161	0.23329	0.227947	1386	0.306279	0.967971	-0.286682	0.344163	1388	0.404999	0.991747
BMI	rs2155645	11	112912947	T	C	-0.0116	7.1e-10	789736	0.2373	0.0409762	0.305557	1405	0.89334	0.98481	0.171597	0.175246	1367	0.327665	0.943145	0.206192	0.191249	1372	0.281166	0.978631	0.224238	0.262764	1416	0.393593	0.966161	0.228032	0.222971	1386	0.30663	0.967971	0.279458	0.337844	1388	0.408278	0.991747
BMI	rs6767619	3	156893782	C	G	0.0119	8.1e-11	691865	0.408	-0.133788	0.279964	1405	0.632814	0.956474	-0.0613576	0.160844	1367	0.702913	0.97304	-0.198913	0.175065	1372	0.256064	0.978631	-0.42579	0.240357	1416	0.0766959	0.966161	0.208704	0.204538	1386	0.307732	0.967971	-0.146667	0.309035	1388	0.635148	0.991747
BMI	rs17831815	3	66437086	C	T	0.011	1.5e-09	689560	0.3083	0.199895	0.277881	1405	0.472042	0.916639	0.0485821	0.160514	1367	0.762191	0.982546	0.217262	0.17446	1372	0.21322	0.978631	0.234494	0.239101	1416	0.326896	0.966161	-0.207381	0.203373	1386	0.308044	0.967971	-0.533618	0.307455	1388	0.0828588	0.991747
BMI	rs1523768	3	77667044	G	A	0.011	2.6e-10	794306	0.2679	0.22559	0.301476	1405	0.454414	0.916639	-0.0899058	0.173549	1367	0.604514	0.952555	0.140523	0.189566	1372	0.458645	0.990772	-0.33101	0.25921	1416	0.201815	0.966161	-0.224999	0.220708	1386	0.308173	0.967971	-0.140389	0.334157	1388	0.674457	0.991747
BMI	rs2228213	6	12124855	A	G	-0.0139	4.6e-16	795595	0.2908	-0.495186	0.28772	1405	0.0854599	0.875461	-0.0632962	0.165311	1367	0.70186	0.97304	-0.279481	0.180352	1372	0.121461	0.978631	-0.535392	0.247107	1416	0.0304297	0.966161	-0.213998	0.210046	1386	0.308471	0.967971	-0.0404561	0.318851	1388	0.899053	0.991747
BMI	rs12593036	15	81058652	G	A	-0.0154	3.8e-16	686055	0.2527	-0.0780499	0.302466	1405	0.79641	0.973405	0.132038	0.173348	1367	0.446377	0.943145	0.042777	0.189065	1372	0.821037	0.990772	0.137109	0.259421	1416	0.597223	0.966161	0.22381	0.220249	1386	0.309729	0.967971	-0.226774	0.33264	1388	0.495518	0.991747
BMI	rs9965170	18	44788274	A	G	-0.0097	2.5e-08	692261	0.3985	0.608462	0.266338	1405	0.022489	0.757624	0.0296487	0.153933	1367	0.847295	0.993871	-0.126025	0.166845	1372	0.450176	0.990772	0.19867	0.229004	1416	0.385794	0.966161	-0.197288	0.194821	1386	0.311399	0.967971	-0.174224	0.293888	1388	0.553397	0.991747
BMI	rs3826705	19	42637232	C	T	0.0157	6.6e-09	690844	0.09905	0.330614	0.483149	1405	0.493905	0.916639	-0.0290479	0.278761	1367	0.917023	0.993871	-0.317203	0.300856	1372	0.291917	0.978631	-0.0615325	0.41574	1416	0.882358	0.982786	0.356393	0.353558	1386	0.313624	0.967971	0.705601	0.531609	1388	0.184632	0.991747
BMI	rs852056	20	17102860	T	C	0.0128	1.8e-10	691874	0.3164	0.0368482	0.285387	1405	0.897284	0.98481	-0.111697	0.164613	1367	0.497544	0.943145	-0.281404	0.178678	1372	0.115506	0.978631	0.289898	0.24443	1416	0.235816	0.966161	-0.209482	0.208436	1386	0.315064	0.967971	-0.207926	0.314343	1388	0.508427	0.991747
BMI	rs11150911	18	73498528	A	C	0.0133	4.7e-13	781716	0.3895	0.513547	0.311128	1405	0.0990459	0.875461	-0.102524	0.179157	1367	0.567241	0.952555	0.290157	0.194757	1372	0.136498	0.978631	-0.0814811	0.267579	1416	0.760783	0.966161	-0.228207	0.227276	1386	0.315509	0.967971	-0.01316	0.343426	1388	0.969438	0.991747
BMI	rs2680648	3	53777176	C	T	-0.016	3.8e-15	686125	0.218	-0.637525	0.317047	1405	0.0445363	0.869587	-0.169064	0.182901	1367	0.355471	0.943145	-0.352404	0.19897	1372	0.0767609	0.978631	-0.383621	0.272942	1416	0.160092	0.966161	0.23301	0.232815	1386	0.31708	0.967971	-0.0504408	0.351129	1388	0.885795	0.991747
BMI	rs17327461	2	35512183	T	C	0.0125	1.5e-14	792231	0.3841	0.0725748	0.288842	1405	0.801649	0.973742	-0.328365	0.165827	1367	0.047887	0.943145	-0.0736698	0.18193	1372	0.68559	0.990772	-0.382852	0.247629	1416	0.122312	0.966161	-0.210804	0.21083	1386	0.317547	0.967971	-0.558636	0.31965	1388	0.0807475	0.991747
BMI	rs6463489	7	5542513	T	C	0.0157	3.1e-09	791893	0.1013	0.351908	0.424498	1405	0.407248	0.916639	-0.0278246	0.245769	1367	0.909878	0.993871	-0.155489	0.266103	1372	0.559102	0.990772	-0.115293	0.364979	1416	0.752134	0.966161	0.309555	0.31026	1386	0.318586	0.967971	-0.0790108	0.469514	1388	0.866386	0.991747
BMI	rs6850639	4	21010996	T	C	0.0124	1.8e-09	788357	0.2771	-0.0287007	0.306116	1405	0.925315	0.985293	-0.127362	0.176258	1367	0.470058	0.943145	-0.149447	0.190909	1372	0.43387	0.990772	-0.162783	0.263255	1416	0.536446	0.966161	0.223019	0.224745	1386	0.321216	0.967971	0.182005	0.337525	1388	0.589812	0.991747
BMI	rs12423255	12	123595064	A	G	-0.0106	4.4e-08	662733	0.2112	0.569847	0.346145	1405	0.0999349	0.875461	0.0606094	0.19919	1367	0.760962	0.982546	0.226706	0.217479	1372	0.2974	0.978631	0.539474	0.297065	1416	0.0695812	0.966161	0.249831	0.253335	1386	0.324223	0.967971	-0.153388	0.383626	1388	0.689339	0.991747
BMI	rs6712	22	50637922	C	G	0.0138	4.4e-08	688469	0.1126	-0.165306	0.409858	1405	0.686771	0.969427	0.139632	0.235595	1367	0.553495	0.952555	0.554765	0.255274	1372	0.0299369	0.92974	-0.0207424	0.352825	1416	0.953128	0.984638	0.295054	0.300089	1386	0.325671	0.967971	0.604503	0.451499	1388	0.180831	0.991747
BMI	rs1554194	3	8138041	C	G	0.0103	3.4e-09	686099	0.4987	-0.344095	0.270266	1405	0.203169	0.916639	-0.315421	0.155147	1367	0.0422422	0.931534	-0.28827	0.168657	1372	0.0876401	0.978631	-0.331418	0.232238	1416	0.153783	0.966161	0.194045	0.197628	1386	0.326336	0.967971	0.548516	0.297541	1388	0.0654718	0.991747
BMI	rs16903285	5	87978252	C	T	0.0331	7.6e-38	687944	0.1635	-0.306798	0.3577	1405	0.391207	0.916639	-0.189359	0.207901	1367	0.362558	0.943145	0.108977	0.223189	1372	0.625437	0.990772	-0.173768	0.307725	1416	0.572378	0.966161	-0.258831	0.263891	1386	0.326851	0.967971	-0.516644	0.393925	1388	0.189897	0.991747
BMI	rs716764	3	82646519	C	T	-0.0179	6.3e-15	691701	0.1566	0.666028	0.354301	1405	0.0603388	0.875461	-0.0239156	0.203272	1367	0.90636	0.993871	-0.0709225	0.22155	1372	0.748927	0.990772	0.340439	0.304746	1416	0.264134	0.966161	-0.253488	0.258635	1386	0.32721	0.967971	-0.591065	0.390536	1388	0.13039	0.991747
BMI	rs1955540	14	40801751	T	C	-0.0158	6.2e-13	690251	0.1697	0.213959	0.353929	1405	0.545592	0.934853	-0.256508	0.203468	1367	0.207642	0.943145	-0.559004	0.220387	1372	0.0113091	0.92974	0.326929	0.304604	1416	0.283324	0.966161	0.254243	0.259569	1386	0.327515	0.967971	0.435866	0.390245	1388	0.26423	0.991747
BMI	rs2305417	2	204360201	G	A	0.0096	3.8e-09	792093	0.4982	-0.0433295	0.272883	1405	0.873862	0.98481	0.063264	0.156496	1367	0.68609	0.972051	-0.033415	0.170729	1372	0.844859	0.990772	-0.0709929	0.234854	1416	0.762479	0.966161	0.195263	0.199432	1386	0.327705	0.967971	-0.0415776	0.301706	1388	0.890412	0.991747
BMI	rs4077093	12	51593616	T	G	0.0128	5.1e-09	620584	0.1769	-0.330451	0.351093	1405	0.346763	0.916639	0.120795	0.202014	1367	0.549971	0.952555	-0.0949417	0.219811	1372	0.665865	0.990772	-0.285094	0.302154	1416	0.345567	0.966161	0.251096	0.257563	1386	0.329786	0.967971	0.360369	0.388499	1388	0.353782	0.991747
BMI	rs4683096	3	45374496	T	G	0.0116	2.8e-11	682633	0.4528	-0.252008	0.26728	1405	0.345915	0.916639	0.00875926	0.153802	1367	0.954592	0.997005	-0.173336	0.167544	1372	0.301053	0.978631	-0.163351	0.229461	1416	0.476653	0.966161	0.189992	0.1955	1386	0.331307	0.967971	-0.101346	0.295104	1388	0.731331	0.991747
BMI	rs1048303	7	100804140	C	T	0.0111	2.7e-10	690582	0.4433	0.323284	0.258974	1405	0.212121	0.916639	-0.0445876	0.149089	1367	0.764935	0.982546	-0.0043279	0.162073	1372	0.9787	0.997535	0.150835	0.222528	1416	0.497994	0.966161	0.183275	0.189428	1386	0.333458	0.967971	-0.112012	0.285696	1388	0.695069	0.991747
BMI	rs2367112	5	64168193	T	G	0.0119	2.3e-13	794305	0.475	-0.161849	0.273064	1405	0.553469	0.935331	0.227426	0.157118	1367	0.147993	0.943145	0.0924681	0.170455	1372	0.587577	0.990772	-0.0706899	0.234784	1416	0.763395	0.966161	-0.192478	0.199782	1386	0.335496	0.967971	-0.159449	0.300636	1388	0.595939	0.991747
BMI	rs17094222	10	102395440	C	T	0.0181	2.2e-19	791705	0.2056	0.107804	0.309859	1405	0.727958	0.973405	-0.0794707	0.179299	1367	0.657671	0.968423	-0.0593222	0.1937	1372	0.759455	0.990772	0.179137	0.265478	1416	0.499933	0.966161	-0.218577	0.226932	1386	0.335625	0.967971	-0.378528	0.340712	1388	0.266766	0.991747
BMI	rs895330	19	4060707	G	C	-0.0201	5.5e-19	684271	0.2421	0.321109	0.353247	1405	0.363496	0.916639	-0.738263	0.202843	1367	0.00028338	0.25334	-0.157879	0.221116	1372	0.475345	0.990772	-0.0218571	0.303669	1416	0.942631	0.984638	-0.24904	0.259227	1386	0.33687	0.967971	0.211493	0.390232	1388	0.587929	0.991747
BMI	rs11115176	12	82465797	C	T	-0.0121	2e-10	792384	0.1878	0.282574	0.345859	1405	0.414056	0.916639	-0.174406	0.198591	1367	0.379983	0.943145	0.144843	0.216825	1372	0.504238	0.990772	0.273868	0.295904	1416	0.354849	0.966161	-0.240767	0.250714	1386	0.33706	0.967971	-0.0303314	0.380129	1388	0.936414	0.991747
BMI	rs12905439	15	99521883	G	C	-0.0118	1.4e-10	675205	0.2602	0.0722184	0.326227	1405	0.824833	0.976099	-0.107571	0.188214	1367	0.567732	0.952555	-0.0570044	0.204505	1372	0.780484	0.990772	-0.240719	0.280266	1416	0.390545	0.966161	0.229184	0.23909	1386	0.337946	0.967971	0.217379	0.360756	1388	0.546898	0.991747
BMI	rs12779943	10	27312657	T	C	0.0213	2e-11	692211	0.08859	1.14936	0.4714	1405	0.0148851	0.757624	0.118628	0.273854	1367	0.664953	0.968423	0.10391	0.29554	1372	0.725197	0.990772	0.69441	0.406261	1416	0.0876222	0.966161	-0.333936	0.34863	1386	0.338306	0.967971	-0.369044	0.521628	1388	0.479385	0.991747
BMI	rs7685048	4	95027784	C	T	0.0101	4.1e-09	692398	0.4655	-0.21506	0.265786	1405	0.418569	0.916639	0.0860569	0.152392	1367	0.572366	0.952555	-0.109677	0.16634	1372	0.50978	0.990772	0.0589237	0.228753	1416	0.796764	0.968016	0.18498	0.194018	1386	0.340547	0.967971	-0.166842	0.29381	1388	0.570225	0.991747
BMI	rs10009336	4	44480783	T	C	-0.014	2.2e-10	794766	0.201	0.113147	0.346816	1405	0.744287	0.973405	0.092572	0.198751	1367	0.641455	0.965121	-0.394819	0.216367	1372	0.0682565	0.978631	0.0566253	0.298529	1416	0.849587	0.977938	0.241708	0.253684	1386	0.340863	0.967971	-0.627391	0.382254	1388	0.100965	0.991747
BMI	rs11635675	15	63793238	G	T	-0.0124	1.3e-11	688719	0.2856	0.427753	0.307705	1405	0.164709	0.916639	-0.169337	0.176694	1367	0.33805	0.943145	0.0390974	0.192663	1372	0.839219	0.990772	0.581345	0.263941	1416	0.0277878	0.966161	0.213584	0.224329	1386	0.341215	0.967971	0.416121	0.339712	1388	0.220814	0.991747
BMI	rs4985155	16	15129459	G	A	-0.012	3e-12	794269	0.371	-0.278011	0.26146	1405	0.28783	0.916639	0.0102899	0.150434	1367	0.945476	0.997005	0.0136509	0.163582	1372	0.933506	0.996224	-0.0168417	0.224768	1416	0.940282	0.984638	-0.180631	0.191088	1386	0.344685	0.967971	-0.120063	0.288518	1388	0.677376	0.991747
BMI	rs10959687	9	11280652	A	G	0.0123	5e-14	781918	0.4871	-0.72373	0.267504	1405	0.00690363	0.757624	-0.0983068	0.154716	1367	0.525274	0.943145	-0.0981024	0.168459	1372	0.560427	0.990772	-0.474087	0.23019	1416	0.039626	0.966161	0.183735	0.196837	1386	0.350757	0.967971	0.405118	0.296865	1388	0.172585	0.991747
BMI	rs12448738	16	56489343	C	A	0.0168	2.8e-11	691932	0.1568	-0.12109	0.382337	1405	0.751512	0.973405	-0.295501	0.219994	1367	0.179426	0.943145	-0.111422	0.238179	1372	0.639995	0.990772	-0.087717	0.327595	1416	0.788923	0.966161	0.26074	0.279508	1386	0.35106	0.967971	0.0191286	0.419462	1388	0.963633	0.991747
BMI	rs7607351	2	69562127	C	T	-0.0119	8.4e-12	685674	0.3924	-0.296072	0.268524	1405	0.270396	0.916639	0.0666879	0.155144	1367	0.667376	0.968562	-0.0510938	0.168156	1372	0.761291	0.990772	-0.206147	0.230834	1416	0.371982	0.966161	0.182571	0.196811	1386	0.353754	0.967971	0.313679	0.296637	1388	0.290492	0.991747
BMI	rs12615778	2	102436738	G	A	-0.0104	3.9e-08	684324	0.2726	-0.391794	0.294457	1405	0.18355	0.916639	0.168541	0.170458	1367	0.32296	0.943145	-0.0267068	0.184924	1372	0.88519	0.996224	-0.199151	0.253559	1416	0.432338	0.966161	-0.200496	0.21699	1386	0.355654	0.967971	-0.144815	0.327019	1388	0.657956	0.991747
BMI	rs3814883	16	29994922	T	C	0.0232	1.1e-40	685519	0.4072	0.21471	0.285686	1405	0.452442	0.916639	-0.170877	0.164479	1367	0.299039	0.943145	0.048472	0.178731	1372	0.786278	0.990772	0.0754246	0.244731	1416	0.75798	0.966161	0.192214	0.208346	1386	0.356393	0.967971	0.161378	0.314077	1388	0.607463	0.991747
BMI	rs592483	11	69445173	C	T	0.0147	2e-18	781871	0.4381	-0.595436	0.269413	1405	0.0272589	0.757624	-0.0420999	0.156194	1367	0.787559	0.992591	-0.196332	0.170099	1372	0.24861	0.978631	-0.150668	0.231797	1416	0.515799	0.966161	-0.181829	0.19802	1386	0.358656	0.967971	-0.327004	0.298881	1388	0.274105	0.991747
BMI	rs2122042	3	85866335	T	G	0.0235	2.3e-31	793383	0.2066	0.635	0.315603	1405	0.0444097	0.869587	-0.22207	0.181595	1367	0.221585	0.943145	-0.185298	0.199799	1372	0.353872	0.984915	0.409949	0.271012	1416	0.130591	0.966161	-0.210824	0.230614	1386	0.360779	0.967971	-0.273591	0.350756	1388	0.435524	0.991747
BMI	rs4864201	4	130731284	T	C	0.0141	1.5e-16	795263	0.4688	0.222397	0.285093	1405	0.435473	0.916639	0.102443	0.164252	1367	0.532933	0.943145	-0.064468	0.178346	1372	0.717799	0.990772	0.0961885	0.244687	1416	0.6943	0.966161	-0.189661	0.20863	1386	0.363467	0.967971	0.173903	0.314052	1388	0.579847	0.991747
BMI	rs12420725	11	117017530	G	A	0.0226	1.3e-09	679599	0.05492	0.615357	0.574322	1405	0.284153	0.916639	0.15567	0.329334	1367	0.636517	0.962853	0.308623	0.360422	1372	0.391992	0.984915	0.757344	0.491235	1416	0.123369	0.966161	-0.37884	0.417201	1386	0.36401	0.967971	-0.464177	0.632236	1388	0.462962	0.991747
BMI	rs7117238	11	78040259	A	G	-0.0131	2.5e-09	788879	0.2558	-0.347259	0.310346	1405	0.263357	0.916639	0.407601	0.178927	1367	0.0228805	0.795942	0.210496	0.194346	1372	0.278955	0.978631	0.0233396	0.266565	1416	0.930241	0.984638	-0.205817	0.227441	1386	0.365664	0.967971	-0.53998	0.34195	1388	0.114538	0.991747
BMI	rs7652415	3	9505238	T	C	0.0156	9.7e-10	680377	0.2042	-0.541756	0.34676	1405	0.118436	0.87976	0.160079	0.200748	1367	0.425352	0.943145	0.0775152	0.218445	1372	0.722757	0.990772	0.0101461	0.297954	1416	0.97284	0.985462	0.230029	0.255183	1386	0.36752	0.967971	0.122903	0.384835	1388	0.749498	0.991747
BMI	rs2271189	12	56494991	A	G	-0.0144	5e-16	675192	0.3359	0.120342	0.283639	1405	0.671428	0.965048	-0.0531245	0.162469	1367	0.743733	0.982546	0.0608414	0.177241	1372	0.731449	0.990772	0.184208	0.243865	1416	0.450155	0.966161	-0.186262	0.206776	1386	0.367856	0.967971	-0.442738	0.312249	1388	0.156446	0.991747
BMI	rs4538727	6	129408564	A	G	-0.0099	4.2e-08	673440	0.4511	0.080112	0.291747	1405	0.783669	0.973405	0.224928	0.167713	1367	0.180098	0.943145	0.0178399	0.182407	1372	0.922104	0.996224	0.173036	0.250376	1416	0.489615	0.966161	0.191744	0.212913	1386	0.367973	0.967971	0.276631	0.321357	1388	0.389486	0.991747
BMI	rs7871866	9	131027982	C	G	0.0187	2.3e-14	683494	0.1507	0.225887	0.382339	1405	0.554748	0.935331	0.0293953	0.219493	1367	0.893483	0.993871	0.136629	0.239426	1372	0.568331	0.990772	0.50314	0.328873	1416	0.126269	0.966161	-0.250725	0.279564	1386	0.36996	0.967971	-0.116433	0.423455	1388	0.783389	0.991747
BMI	rs1899689	7	121964349	T	C	0.0117	1.5e-12	794654	0.4023	0.101531	0.287189	1405	0.723742	0.973405	0.0590508	0.164547	1367	0.71975	0.979385	0.176809	0.179301	1372	0.324259	0.978631	-0.0419848	0.246797	1416	0.864941	0.979034	-0.187271	0.209576	1386	0.371707	0.967971	-0.234131	0.316315	1388	0.459316	0.991747
BMI	rs11713193	3	49924424	A	G	0.0239	2.4e-44	692159	0.4668	-0.288095	0.256511	1405	0.261576	0.916639	0.0273804	0.147213	1367	0.852479	0.993871	0.18004	0.160606	1372	0.262484	0.978631	-0.0251049	0.220249	1416	0.909267	0.984638	-0.167099	0.187099	1386	0.371957	0.967971	0.412291	0.282542	1388	0.144734	0.991747
BMI	rs12147845	14	101144596	T	C	0.0199	4.5e-13	687445	0.1123	0.68031	0.426996	1405	0.111332	0.875461	0.159828	0.245652	1367	0.515398	0.943145	0.32573	0.267703	1372	0.223908	0.978631	0.331932	0.367777	1416	0.366927	0.966161	-0.279218	0.312761	1386	0.372146	0.967971	0.0168748	0.471934	1388	0.971482	0.991747
BMI	rs2029085	2	187207393	A	G	-0.0164	3.6e-09	692040	0.1146	-0.80215	0.415851	1405	0.053942	0.875461	-0.116506	0.240312	1367	0.627889	0.958742	-0.22899	0.261515	1372	0.381386	0.984915	-0.474587	0.357864	1416	0.185001	0.966161	-0.26856	0.304828	1386	0.37846	0.967971	-0.410945	0.461803	1388	0.373691	0.991747
BMI	rs738140	22	41884954	G	A	-0.0135	5.1e-13	687178	0.2202	-0.635502	0.37602	1405	0.0912373	0.875461	-0.110096	0.216428	1367	0.611047	0.952555	-0.190195	0.235768	1372	0.419978	0.990772	0.0187784	0.32406	1416	0.953799	0.984638	0.242106	0.274908	1386	0.378646	0.967971	-0.387897	0.415616	1388	0.350826	0.991747
BMI	rs6713781	2	40291940	C	G	-0.0123	3.8e-12	674261	0.4634	-0.224165	0.260868	1405	0.390322	0.916639	0.0616648	0.149973	1367	0.68101	0.972051	-0.238914	0.163884	1372	0.145121	0.978631	-0.0196388	0.224059	1416	0.930167	0.984638	-0.168012	0.19078	1386	0.378655	0.967971	-0.419799	0.288571	1388	0.145966	0.991747
BMI	rs17757975	6	38214150	C	T	-0.0143	4.2e-09	690716	0.1103	0.995875	0.427894	1405	0.0200874	0.757624	-0.13627	0.248907	1367	0.584145	0.952555	-0.224952	0.271038	1372	0.406705	0.984915	0.290743	0.369191	1416	0.431114	0.966161	0.277887	0.315586	1386	0.378719	0.967971	0.53052	0.475702	1388	0.264944	0.991747
BMI	rs4865796	5	53272664	G	A	0.0103	5.2e-09	789716	0.2795	-0.245633	0.298085	1405	0.41006	0.916639	-0.201428	0.170669	1367	0.23812	0.943145	-0.245701	0.185967	1372	0.186653	0.978631	-0.195675	0.255759	1416	0.444354	0.966161	0.190748	0.217027	1386	0.379603	0.967971	0.384171	0.327719	1388	0.241296	0.991747
BMI	rs17001561	4	77096118	A	G	0.0151	3.8e-11	794327	0.1746	0.311214	0.343561	1405	0.365173	0.916639	-0.0062036	0.198906	1367	0.975124	0.997005	0.0412789	0.216056	1372	0.84851	0.990772	-0.0189472	0.295399	1416	0.948867	0.984638	0.222355	0.25321	1386	0.380018	0.967971	0.198427	0.381058	1388	0.60264	0.991747
BMI	rs6235	5	95728898	G	C	0.0175	1.5e-19	691708	0.2424	0.789321	0.302406	1405	0.00914774	0.757624	-0.0002477	0.175465	1367	0.998874	0.998874	-0.0664788	0.190347	1372	0.726955	0.990772	0.524771	0.260182	1416	0.0438924	0.966161	-0.195667	0.223006	1386	0.380418	0.967971	0.223199	0.335727	1388	0.506275	0.991747
BMI	rs138289	22	32182708	T	A	-0.0103	3.3e-09	687258	0.4488	-0.259275	0.276148	1405	0.347946	0.916639	0.265686	0.158843	1367	0.0946308	0.943145	0.294494	0.172278	1372	0.0876026	0.978631	0.109019	0.237485	1416	0.646263	0.966161	0.177177	0.202003	1386	0.380585	0.967971	-0.0814797	0.303987	1388	0.788711	0.991747
BMI	rs273504	19	18215247	G	A	0.0153	4.4e-18	690672	0.4394	-0.0980622	0.286384	1405	0.732091	0.973405	0.167169	0.164689	1367	0.310258	0.943145	0.205869	0.179229	1372	0.250909	0.978631	0.102521	0.245799	1416	0.676672	0.966161	0.183263	0.209126	1386	0.381005	0.967971	0.203415	0.315859	1388	0.519679	0.991747
BMI	rs901630	6	98539519	T	C	-0.0146	1.9e-18	794597	0.3362	-0.369221	0.286674	1405	0.197978	0.916639	-0.188702	0.164835	1367	0.252498	0.943145	-0.1257	0.179944	1372	0.484952	0.990772	-0.0524599	0.246314	1416	0.831374	0.970298	-0.182612	0.208824	1386	0.38201	0.967971	0.136131	0.316587	1388	0.667267	0.991747
BMI	rs2007231	1	115266306	C	T	0.0104	5.2e-09	691969	0.2736	-0.523431	0.29261	1405	0.0738587	0.875461	-0.155482	0.168028	1367	0.354958	0.943145	0.0824974	0.183039	1372	0.652271	0.990772	-0.368981	0.251383	1416	0.142381	0.966161	0.186754	0.213992	1386	0.382973	0.967971	0.523493	0.322285	1388	0.104537	0.991747
BMI	rs17636031	10	126594078	C	T	0.016	1.2e-17	782807	0.2279	0.43945	0.352275	1405	0.212437	0.916639	0.227299	0.203169	1367	0.263438	0.943145	-0.0340002	0.220668	1372	0.877571	0.993592	0.595122	0.302368	1416	0.049241	0.966161	0.225879	0.258892	1386	0.383096	0.967971	0.267531	0.389045	1388	0.491782	0.991747
BMI	rs13432055	2	56603985	C	T	0.0117	8.9e-11	790223	0.2516	0.204583	0.311476	1405	0.511407	0.916639	0.141923	0.178061	1367	0.425564	0.943145	0.433227	0.194141	1372	0.0258102	0.92974	-0.0458909	0.267355	1416	0.863739	0.979034	-0.197309	0.226298	1386	0.383415	0.967971	-0.198736	0.342705	1388	0.562074	0.991747
BMI	rs3766430	1	54730651	C	T	0.0113	3.9e-12	791258	0.4104	0.14701	0.267496	1405	0.582697	0.94719	0.140086	0.154309	1367	0.364132	0.943145	0.0607418	0.167063	1372	0.716225	0.990772	-0.191345	0.229547	1416	0.404663	0.966161	0.170327	0.195476	1386	0.383718	0.967971	0.290468	0.294244	1388	0.323735	0.991747
BMI	rs7573263	2	174980833	T	C	0.0142	1.6e-15	681572	0.4258	0.107836	0.259171	1405	0.677414	0.965048	-0.143237	0.149121	1367	0.336952	0.943145	-0.0043232	0.161993	1372	0.978713	0.997535	-0.169125	0.222454	1416	0.447222	0.966161	-0.164738	0.189444	1386	0.384679	0.967971	-0.0134496	0.285629	1388	0.96245	0.991747
BMI	rs6804842	3	25106437	A	G	-0.0156	3.6e-21	789179	0.4487	-0.0124998	0.260712	1405	0.961767	0.992802	0.0911334	0.149898	1367	0.543311	0.943145	-0.0113639	0.162681	1372	0.94432	0.996224	-0.0601145	0.22375	1416	0.788224	0.966161	0.165314	0.190357	1386	0.385305	0.967971	0.254858	0.286776	1388	0.374319	0.991747
BMI	rs10904675	10	16120989	A	C	-0.0117	1.5e-08	688358	0.2998	0.0161571	0.331243	1405	0.961104	0.992802	0.102798	0.190494	1367	0.589534	0.952555	0.214951	0.207801	1372	0.301129	0.978631	0.094282	0.284279	1416	0.7402	0.966161	0.20842	0.242336	1386	0.389913	0.967971	0.654231	0.365491	1388	0.0736728	0.991747
BMI	rs13375205	1	173947191	A	G	0.019	3.6e-12	691411	0.1214	-0.905952	0.407747	1405	0.0264537	0.757624	-0.0478419	0.236418	1367	0.839665	0.993871	-0.23463	0.257076	1372	0.36157	0.984915	-0.410878	0.351186	1416	0.24221	0.966161	-0.256768	0.298969	1386	0.390576	0.967971	0.216283	0.452527	1388	0.632765	0.991747
BMI	rs705980	8	64727201	C	T	0.0112	7.7e-11	688848	0.4381	-0.0083596	0.280455	1405	0.976225	0.994282	-0.0067541	0.161204	1367	0.966586	0.997005	-0.116228	0.176198	1372	0.509593	0.990772	-0.169453	0.24089	1416	0.481896	0.966161	0.175725	0.204909	1386	0.391277	0.967971	0.0511216	0.310596	1388	0.869289	0.991747
BMI	rs13034320	2	133518125	C	G	0.0114	3.1e-08	677027	0.2565	-0.240895	0.300252	1405	0.42251	0.916639	-0.0185881	0.172889	1367	0.914397	0.993871	-0.0717077	0.188549	1372	0.703773	0.990772	-0.187462	0.25817	1416	0.467887	0.966161	-0.188692	0.220193	1386	0.39163	0.967971	0.129643	0.333057	1388	0.69715	0.991747
BMI	rs1324110	6	93913200	C	G	-0.0103	6.8e-10	786661	0.4977	0.653625	0.271621	1405	0.0162407	0.757624	-0.161672	0.156225	1367	0.300915	0.943145	-0.13325	0.170825	1372	0.435505	0.990772	0.498379	0.233576	1416	0.0330408	0.966161	-0.169798	0.19882	1386	0.393235	0.967971	-0.0296927	0.301056	1388	0.921448	0.991747
BMI	rs9827823	3	84221774	C	T	-0.0193	1.2e-15	691925	0.2113	0.232706	0.35883	1405	0.51676	0.916639	0.22151	0.206815	1367	0.284336	0.943145	-0.0148329	0.225177	1372	0.947489	0.996224	0.0957088	0.308035	1416	0.756069	0.966161	-0.224428	0.263062	1386	0.393733	0.967971	0.0317869	0.396891	1388	0.936177	0.991747
BMI	rs11971041	7	26698848	G	A	0.021	1e-11	689741	0.1084	0.36981	0.46331	1405	0.424896	0.916639	0.190323	0.266782	1367	0.47572	0.943145	-0.418852	0.289071	1372	0.147581	0.978631	0.213919	0.398672	1416	0.591644	0.966161	-0.289077	0.339444	1386	0.394574	0.967971	-0.0315961	0.511443	1388	0.950748	0.991747
BMI	rs9547153	13	85903717	G	A	0.0098	8.7e-09	775400	0.3833	-0.0544563	0.266734	1405	0.838259	0.979806	-0.175976	0.153534	1367	0.251926	0.943145	-0.0625759	0.167318	1372	0.708467	0.990772	-0.179914	0.22909	1416	0.432387	0.966161	0.165652	0.194989	1386	0.395725	0.967971	-0.0907189	0.295262	1388	0.7587	0.991747
BMI	rs762147	21	39238610	A	G	-0.0115	3.3e-09	692496	0.2408	-0.129071	0.29979	1405	0.666872	0.965048	-0.211214	0.171897	1367	0.219388	0.943145	-0.127699	0.187527	1372	0.496011	0.990772	0.0205974	0.257305	1416	0.936208	0.984638	0.185259	0.218661	1386	0.397008	0.967971	-0.0699829	0.32948	1388	0.831823	0.991747
BMI	rs7674623	4	80794681	T	C	0.0135	5.7e-10	685776	0.1912	0.52172	0.327736	1405	0.111636	0.875461	-0.0247717	0.189476	1367	0.896002	0.993871	-0.0776278	0.206183	1372	0.706604	0.990772	-0.154276	0.280273	1416	0.5821	0.966161	-0.202261	0.238779	1386	0.397108	0.967971	-0.235913	0.360691	1388	0.513184	0.991747
BMI	rs1511471	6	23868594	A	G	0.0113	9.9e-10	688880	0.3097	-0.0779783	0.285289	1405	0.784639	0.973405	0.329261	0.16342	1367	0.0441218	0.931534	0.293226	0.178199	1372	0.100098	0.978631	-0.0852858	0.243945	1416	0.726683	0.966161	0.175506	0.207419	1386	0.39762	0.967971	0.274002	0.313328	1388	0.382005	0.991747
BMI	rs881301	8	38332318	C	T	0.0097	2.4e-08	691753	0.3655	0.371012	0.262731	1405	0.158134	0.916639	0.26781	0.151045	1367	0.0764462	0.943145	0.281399	0.164826	1372	0.0880047	0.978631	0.0315715	0.225563	1416	0.888706	0.982786	-0.161966	0.191682	1386	0.398274	0.967971	0.183568	0.290533	1388	0.527602	0.991747
BMI	rs13153166	5	71494931	C	A	-0.0232	8.1e-09	724781	0.02664	1.55268	0.827111	1405	0.060695	0.875461	-0.578263	0.476704	1367	0.225325	0.943145	-0.876318	0.522515	1372	0.0937504	0.978631	-0.214091	0.71399	1416	0.764334	0.966161	0.508568	0.605761	1386	0.401305	0.967971	0.621442	0.918656	1388	0.498857	0.991747
BMI	rs10878946	12	69642315	C	T	0.0141	3.6e-13	685707	0.279	0.195713	0.299061	1405	0.512946	0.916639	-0.19018	0.171726	1367	0.26829	0.943145	-0.14042	0.187193	1372	0.453305	0.990772	0.0503673	0.257056	1416	0.844686	0.976908	0.183191	0.218549	1386	0.402056	0.967971	-0.195908	0.330433	1388	0.553357	0.991747
BMI	rs12411886	10	104685299	A	C	0.0271	1.5e-19	792405	0.09693	-0.0878604	0.452339	1405	0.84602	0.981618	-0.105441	0.259513	1367	0.684585	0.972051	-0.213977	0.283554	1372	0.450605	0.990772	-0.403889	0.387831	1416	0.297867	0.966161	0.276215	0.329706	1386	0.402311	0.967971	0.0845535	0.500094	1388	0.865762	0.991747
BMI	rs2045293	7	114350102	T	C	0.014	1.9e-15	683636	0.3362	0.0223927	0.286205	1405	0.937648	0.987505	-0.163717	0.164533	1367	0.319895	0.943145	0.0318035	0.179169	1372	0.859137	0.991056	0.314159	0.245682	1416	0.201207	0.966161	0.17266	0.209104	1386	0.409112	0.967971	-0.591646	0.315201	1388	0.0607231	0.991747
BMI	rs10765208	11	89207232	T	G	0.0191	4.9e-08	688168	0.09758	-0.125074	0.444371	1405	0.778397	0.973405	-0.386761	0.255634	1367	0.130527	0.943145	0.195961	0.277004	1372	0.479421	0.990772	0.15845	0.382498	1416	0.678755	0.966161	0.268332	0.32544	1386	0.409787	0.967971	0.220919	0.489419	1388	0.651779	0.991747
BMI	rs4148155	4	89054667	G	A	-0.0188	5e-13	794889	0.1139	-0.613084	0.42386	1405	0.148282	0.916639	-0.0913306	0.243293	1367	0.707427	0.97304	0.0881002	0.266134	1372	0.740667	0.990772	-0.0850283	0.364785	1416	0.815724	0.96912	0.255063	0.309857	1386	0.410559	0.967971	0.216773	0.469078	1388	0.644065	0.991747
BMI	rs10887578	10	88096047	C	G	0.0128	1.6e-13	679172	0.4255	-0.0169883	0.281522	1405	0.95189	0.992802	0.31617	0.161162	1367	0.0499885	0.943145	0.15082	0.175727	1372	0.390898	0.984915	-0.30962	0.242205	1416	0.20134	0.966161	-0.168584	0.205539	1386	0.412241	0.967971	0.0844202	0.310785	1388	0.785943	0.991747
BMI	rs17096510	14	98616999	C	A	-0.0148	8.3e-09	688644	0.117	0.0381891	0.429391	1405	0.929144	0.985293	-0.158667	0.246997	1367	0.520732	0.943145	-0.336552	0.268533	1372	0.210313	0.978631	0.459366	0.365056	1416	0.208477	0.966161	-0.254043	0.311258	1386	0.414538	0.967971	-0.0419121	0.468452	1388	0.928722	0.991747
BMI	rs946824	1	243684019	T	C	0.0206	1.1e-15	689849	0.1196	-0.439354	0.393682	1405	0.264609	0.916639	0.185691	0.228788	1367	0.417146	0.943145	-0.126759	0.245639	1372	0.605911	0.990772	-0.353067	0.338105	1416	0.296549	0.966161	0.236861	0.290397	1386	0.414845	0.967971	0.542489	0.433171	1388	0.210648	0.991747
BMI	rs11611246	12	939480	T	G	0.024	5e-32	779823	0.2074	0.37277	0.335136	1405	0.266203	0.916639	-0.0997008	0.193276	1367	0.606046	0.952555	0.207155	0.209924	1372	0.323911	0.978631	-0.262558	0.288394	1416	0.362759	0.966161	0.20011	0.245583	1386	0.415308	0.967971	0.231619	0.37043	1388	0.531897	0.991747
BMI	rs11096549	2	16607101	C	T	-0.0109	1.4e-08	686285	0.4067	0.157364	0.323676	1405	0.626918	0.954904	-0.168323	0.185936	1367	0.365481	0.943145	-0.0463808	0.202402	1372	0.818785	0.990772	0.313783	0.27764	1416	0.258593	0.966161	-0.192744	0.236596	1386	0.415411	0.967971	-0.277085	0.356542	1388	0.437207	0.991747
BMI	rs13417156	2	62848319	C	T	0.0144	2.6e-17	741230	0.451	-0.278137	0.266337	1405	0.296525	0.916639	-0.0649754	0.153521	1367	0.672192	0.970823	0.134478	0.167664	1372	0.422653	0.990772	0.0890193	0.229193	1416	0.697776	0.966161	0.158783	0.195319	1386	0.416393	0.967971	-0.408325	0.295091	1388	0.166666	0.991747
BMI	rs756717	16	72996162	A	G	-0.0148	5.4e-18	771976	0.3591	-0.026818	0.281673	1405	0.924162	0.985293	-0.175554	0.162428	1367	0.279974	0.943145	-0.253543	0.176458	1372	0.150993	0.978631	-0.146867	0.242309	1416	0.544537	0.966161	0.168048	0.206733	1386	0.416432	0.967971	0.332402	0.311958	1388	0.28682	0.991747
BMI	rs12620249	2	155027447	G	A	0.0135	4.4e-08	680810	0.1631	0.378967	0.375504	1405	0.313042	0.916639	-0.027695	0.216027	1367	0.898008	0.993871	0.0549939	0.234385	1372	0.814531	0.990772	-0.209268	0.322842	1416	0.516958	0.966161	0.22202	0.273851	1386	0.417659	0.967971	0.256223	0.413389	1388	0.535485	0.991747
BMI	rs10668	3	123211064	T	G	-0.0131	1.7e-13	677610	0.4382	0.433529	0.330404	1405	0.189696	0.916639	-0.147699	0.189914	1367	0.436872	0.943145	-0.0136581	0.207267	1372	0.94747	0.996224	0.0768911	0.28402	1416	0.786643	0.966161	-0.195067	0.241492	1386	0.41937	0.967971	0.435763	0.365301	1388	0.233119	0.991747
BMI	rs3172494	3	48731487	T	G	-0.0159	1.1e-08	673596	0.111	0.033537	0.446022	1405	0.940073	0.987505	-0.248987	0.255574	1367	0.330118	0.943145	-0.142289	0.278144	1372	0.609037	0.990772	0.223907	0.382666	1416	0.558559	0.966161	0.262787	0.32533	1386	0.419371	0.967971	-0.534562	0.490139	1388	0.275625	0.991747
BMI	rs2216427	3	180785697	G	C	0.0112	4.2e-10	690571	0.4376	-0.678602	0.280348	1405	0.0156235	0.757624	-0.170467	0.162282	1367	0.293703	0.943145	-0.267463	0.175532	1372	0.127811	0.978631	-0.540472	0.241483	1416	0.0253684	0.966161	-0.166973	0.206865	1386	0.419713	0.967971	-0.0196456	0.31064	1388	0.949583	0.991747
BMI	rs328049	3	78985805	A	G	0.0101	3.7e-09	689545	0.4217	0.240697	0.263744	1405	0.361603	0.916639	0.314911	0.151437	1367	0.0377612	0.921635	0.0370769	0.165906	1372	0.823194	0.990772	0.132837	0.226567	1416	0.557766	0.966161	0.155626	0.192876	1386	0.419879	0.967971	-0.0265477	0.292324	1388	0.927652	0.991747
BMI	rs10797115	9	92191256	C	T	-0.0124	9.9e-13	687215	0.4582	-0.191307	0.259911	1405	0.461827	0.916639	0.227103	0.149514	1367	0.129012	0.943145	0.172094	0.162444	1372	0.289602	0.978631	-0.142849	0.223111	1416	0.522106	0.966161	0.151874	0.189634	1386	0.423339	0.967971	0.195909	0.286331	1388	0.493961	0.991747
BMI	rs7865157	9	122631560	T	C	0.0177	3.7e-10	690934	0.1651	-0.482197	0.449261	1405	0.283317	0.916639	-0.0553954	0.257725	1367	0.829847	0.993871	0.372204	0.280758	1372	0.185159	0.978631	-0.39261	0.385291	1416	0.30838	0.966161	0.261777	0.327301	1386	0.423962	0.967971	-0.590106	0.493813	1388	0.232293	0.991747
BMI	rs6864049	5	124330522	A	G	-0.0125	6.7e-14	776397	0.3838	0.0798388	0.284717	1405	0.779201	0.973405	0.0940168	0.163203	1367	0.564662	0.952555	0.341115	0.177803	1372	0.0552575	0.92974	0.279709	0.245008	1416	0.253802	0.966161	-0.166462	0.208149	1386	0.424009	0.967971	-0.101448	0.314281	1388	0.7469	0.991747
BMI	rs7025938	9	103088321	G	C	0.0166	3.7e-19	691581	0.4161	-0.226173	0.284598	1405	0.426917	0.916639	0.0184532	0.163714	1367	0.910272	0.993871	0.241879	0.17815	1372	0.174776	0.978631	0.0362032	0.244524	1416	0.88232	0.982786	-0.166276	0.208047	1386	0.424299	0.967971	0.0958877	0.314371	1388	0.760402	0.991747
BMI	rs7874154	9	27777012	C	T	0.0127	1.8e-13	685829	0.4091	0.10668	0.308294	1405	0.72937	0.973405	0.253912	0.177261	1367	0.152256	0.943145	0.347712	0.193101	1372	0.0719766	0.978631	-0.0175697	0.265275	1416	0.947203	0.984638	0.179971	0.225707	1386	0.425377	0.967971	0.202971	0.341685	1388	0.552591	0.991747
BMI	rs12422552	12	14413931	C	G	-0.0134	1.6e-11	689543	0.2777	-0.468246	0.291631	1405	0.108585	0.875461	-0.13606	0.167307	1367	0.416224	0.943145	-0.141743	0.183127	1372	0.439057	0.990772	-0.474703	0.249468	1416	0.0572631	0.966161	0.168885	0.212241	1386	0.426332	0.967971	-0.0204207	0.320395	1388	0.94919	0.991747
BMI	rs4711986	6	51789259	A	G	0.0143	1.7e-15	687827	0.3692	-0.150054	0.276365	1405	0.587246	0.94719	-0.118123	0.158783	1367	0.457053	0.943145	0.166022	0.172641	1372	0.336392	0.978631	-0.091835	0.237422	1416	0.698963	0.966161	0.160436	0.201985	1386	0.427161	0.967971	0.160171	0.304039	1388	0.59841	0.991747
BMI	rs998584	6	43757896	A	C	-0.0131	1.3e-14	757136	0.4667	0.42263	0.265484	1405	0.111629	0.875461	-0.002437	0.153171	1367	0.987308	0.997005	0.0902845	0.166063	1372	0.586754	0.990772	0.139825	0.228503	1416	0.540692	0.966161	-0.154535	0.195048	1386	0.428326	0.967971	-0.305605	0.29295	1388	0.297039	0.991747
BMI	rs8036040	15	36402716	A	C	0.0109	2.7e-10	691068	0.4765	0.129058	0.277896	1405	0.642428	0.959084	-0.127186	0.159976	1367	0.426733	0.943145	0.19909	0.174012	1372	0.252777	0.978631	0.0516322	0.237883	1416	0.828202	0.96912	0.160481	0.20285	1386	0.429003	0.967971	0.541971	0.30519	1388	0.0759791	0.991747
BMI	rs12939549	17	78611724	G	A	-0.018	2.7e-28	793950	0.4122	-0.172358	0.260903	1405	0.508965	0.916639	-0.141672	0.149729	1367	0.344221	0.943145	0.0450866	0.163769	1372	0.783123	0.990772	0.00956816	0.224292	1416	0.965979	0.985462	-0.150497	0.190562	1386	0.429808	0.967971	-0.392086	0.288265	1388	0.174002	0.991747
BMI	rs4745794	10	77534000	G	A	0.0114	7.2e-11	678128	0.4307	0.211386	0.266804	1405	0.428326	0.916639	-0.0975279	0.153052	1367	0.524089	0.943145	-0.0856846	0.16702	1372	0.60802	0.990772	0.189114	0.229516	1416	0.410099	0.966161	0.153023	0.19494	1386	0.432604	0.967971	-0.073428	0.295085	1388	0.803524	0.991747
BMI	rs12488237	3	56114861	C	T	0.0235	4.5e-11	787551	0.068	0.371293	0.547253	1405	0.497589	0.916639	0.212386	0.315584	1367	0.501066	0.943145	0.02562	0.343343	1372	0.940529	0.996224	0.473373	0.470037	1416	0.314062	0.966161	0.313642	0.401205	1386	0.434497	0.967971	0.645351	0.605504	1388	0.286698	0.991747
BMI	rs4500930	2	228985505	T	C	0.0156	6.5e-18	680852	0.3735	-0.133338	0.270971	1405	0.622744	0.954904	-0.160716	0.15638	1367	0.304261	0.943145	-0.015596	0.169257	1372	0.926597	0.996224	-0.308736	0.232377	1416	0.184196	0.966161	0.15489	0.198739	1386	0.435898	0.967971	-0.225967	0.298281	1388	0.44884	0.991747
BMI	rs2346840	3	89533267	G	T	0.0107	4.1e-08	682225	0.2275	0.510253	0.311382	1405	0.101507	0.875461	-0.0468505	0.178675	1367	0.793199	0.992591	-0.0718626	0.195213	1372	0.712838	0.990772	0.387555	0.267552	1416	0.147693	0.966161	-0.176496	0.227232	1386	0.437457	0.967971	-0.186933	0.344349	1388	0.587315	0.991747
BMI	rs2010281	14	103862322	A	G	-0.0161	6.7e-21	794009	0.3016	-0.622581	0.305408	1405	0.041686	0.869587	-0.167995	0.175618	1367	0.338942	0.943145	0.0628241	0.191121	1372	0.742422	0.990772	-0.341951	0.262288	1416	0.192541	0.966161	-0.172963	0.222986	1386	0.438079	0.967971	-0.0819869	0.336745	1388	0.807679	0.991747
BMI	rs1169091	12	122462486	T	C	-0.0113	6.9e-09	678299	0.2612	0.231433	0.300155	1405	0.440811	0.916639	0.123918	0.172848	1367	0.47355	0.943145	0.0409374	0.188377	1372	0.827995	0.990772	-0.106489	0.258172	1416	0.680056	0.966161	0.170371	0.219964	1386	0.438743	0.967971	0.0333007	0.332526	1388	0.920244	0.991747
BMI	rs7826312	8	32400115	T	C	-0.0104	4.9e-10	785343	0.448	-0.19336	0.263729	1405	0.463574	0.916639	-0.21582	0.151735	1367	0.155156	0.943145	-0.286365	0.164872	1372	0.0826337	0.978631	-0.0553164	0.226426	1416	0.807032	0.96912	-0.148418	0.192958	1386	0.441922	0.967971	0.13733	0.291306	1388	0.637408	0.991747
BMI	rs779206	3	118023515	G	A	0.0127	1.1e-10	689160	0.2651	0.530342	0.293939	1405	0.0714065	0.875461	-0.0413085	0.169195	1367	0.807154	0.993871	0.0240432	0.184231	1372	0.896185	0.996224	0.249609	0.253028	1416	0.324064	0.966161	-0.164883	0.215571	1386	0.444481	0.967971	-0.182668	0.3251	1388	0.574288	0.991747
BMI	rs2282231	1	39569571	T	C	0.0165	4.8e-15	689443	0.2171	0.31711	0.359495	1405	0.377876	0.916639	0.186229	0.208401	1367	0.37169	0.943145	-0.0104967	0.224832	1372	0.96277	0.997084	-0.0121377	0.308931	1416	0.968665	0.985462	-0.200512	0.264217	1386	0.448048	0.967971	-0.309949	0.396573	1388	0.434603	0.991747
BMI	rs208015	17	46252346	T	C	0.0356	1.4e-25	691575	0.05737	0.607978	0.621161	1405	0.32786	0.916639	-0.107698	0.35719	1367	0.763069	0.982546	0.367711	0.3884	1372	0.343944	0.978631	1.17468	0.531646	1416	0.0273003	0.966161	-0.341273	0.451736	1386	0.450096	0.967971	-0.314076	0.684801	1388	0.646566	0.991747
BMI	rs9408882	9	118664402	A	G	-0.0093	1.3e-08	794283	0.3951	-0.268074	0.264658	1405	0.311279	0.916639	0.245006	0.151577	1367	0.106245	0.943145	-0.241418	0.165203	1372	0.144153	0.978631	-0.181288	0.227235	1416	0.425122	0.966161	0.14562	0.19313	1386	0.450978	0.967971	0.284456	0.291071	1388	0.328605	0.991747
BMI	rs2293605	3	184044433	T	C	-0.0167	3.6e-10	668940	0.09644	-0.431947	0.473349	1405	0.361645	0.916639	0.0186427	0.270247	1367	0.945013	0.997005	-0.432828	0.296223	1372	0.144204	0.978631	-0.300549	0.407961	1416	0.461422	0.966161	-0.260315	0.345524	1386	0.451344	0.967971	0.349465	0.524268	1388	0.505154	0.991747
BMI	rs1937684	10	53680085	T	A	-0.0112	8.7e-10	690063	0.3524	-0.127971	0.271543	1405	0.63752	0.957887	0.201137	0.15578	1367	0.196867	0.943145	-0.0641695	0.170311	1372	0.706397	0.990772	-0.0332569	0.233394	1416	0.886712	0.982786	0.149189	0.19842	1386	0.452249	0.967971	0.324669	0.300215	1388	0.279685	0.991747
BMI	rs331949	4	143663206	C	T	0.011	1e-10	787844	0.3712	0.606085	0.272352	1405	0.0262157	0.757624	-0.0900192	0.156966	1367	0.566406	0.952555	-0.151873	0.171147	1372	0.375032	0.984915	0.596776	0.233942	1416	0.0108479	0.966161	-0.150372	0.200054	1386	0.452385	0.967971	0.107171	0.301909	1388	0.72266	0.991747
BMI	rs10073659	5	107954472	T	C	-0.0255	2e-08	674901	0.04511	-1.14703	0.625337	1405	0.0668276	0.875461	-0.291518	0.357544	1367	0.415024	0.943145	-0.152976	0.391365	1372	0.695948	0.990772	-0.148836	0.537627	1416	0.781945	0.966161	0.340444	0.453433	1386	0.452893	0.967971	-0.122213	0.687208	1388	0.858875	0.991747
BMI	rs6804181	3	116937546	T	A	-0.0153	5.5e-11	687538	0.1659	0.514828	0.37866	1405	0.174175	0.916639	-0.328773	0.218207	1367	0.132121	0.943145	0.0632807	0.236805	1372	0.789335	0.990772	0.581182	0.325433	1416	0.074336	0.966161	-0.207986	0.278093	1386	0.454648	0.967971	0.0448671	0.418198	1388	0.914577	0.991747
BMI	rs7031064	9	14455076	G	A	-0.0108	3.1e-10	691926	0.4564	-0.198758	0.265444	1405	0.454119	0.916639	-0.0934059	0.152118	1367	0.539294	0.943145	-3.62e-05	0.166016	1372	0.999826	0.999826	-0.0645495	0.228296	1416	0.777414	0.966161	-0.145017	0.194006	1386	0.454899	0.967971	-0.113738	0.293348	1388	0.698281	0.991747
BMI	rs17531363	1	107977075	C	A	-0.0133	2e-12	687883	0.2738	-0.154196	0.293459	1405	0.599359	0.948367	0.004092	0.169111	1367	0.980699	0.997005	0.114287	0.183145	1372	0.532717	0.990772	-0.0230382	0.252438	1416	0.927297	0.984638	0.161149	0.215661	1386	0.455049	0.967971	0.19555	0.323671	1388	0.545834	0.991747
BMI	rs2080454	16	49062590	C	A	0.0129	1.7e-14	784784	0.4132	0.0748347	0.269169	1405	0.781038	0.973405	-0.108515	0.154563	1367	0.482752	0.943145	0.0187382	0.16787	1372	0.911139	0.996224	0.0457517	0.23133	1416	0.843248	0.976508	0.146904	0.196764	1386	0.455434	0.967971	-0.075566	0.296323	1388	0.798752	0.991747
BMI	rs6781254	3	80649139	T	C	0.0112	4.9e-10	777021	0.2625	0.345091	0.306444	1405	0.260311	0.916639	0.188202	0.17625	1367	0.285795	0.943145	0.267645	0.191296	1372	0.162006	0.978631	0.334973	0.263566	1416	0.203964	0.966161	-0.166958	0.224614	1386	0.45742	0.967971	-0.0786271	0.338162	1388	0.816174	0.991747
BMI	rs11264483	1	156406381	G	C	-0.0137	3e-14	655917	0.4582	0.211695	0.290353	1405	0.466065	0.916639	-0.0242177	0.166266	1367	0.884214	0.993871	0.156309	0.181926	1372	0.390387	0.984915	0.293316	0.249456	1416	0.239865	0.966161	-0.157193	0.211935	1386	0.458393	0.967971	-0.155616	0.320798	1388	0.627689	0.991747
BMI	rs1371108	2	81816251	A	C	0.0119	9e-11	684620	0.3181	-0.0257081	0.294226	1405	0.930386	0.985293	0.20321	0.168166	1367	0.227109	0.943145	-0.0621445	0.183865	1372	0.735424	0.990772	-0.316818	0.252149	1416	0.209154	0.966161	-0.158123	0.21386	1386	0.459804	0.967971	-0.191508	0.323222	1388	0.553616	0.991747
BMI	rs1522569	4	171632637	G	T	-0.0164	2.9e-13	689573	0.1894	-0.406907	0.331771	1405	0.220229	0.916639	-0.468064	0.189845	1367	0.0138056	0.730181	-0.200663	0.207449	1372	0.333573	0.978631	-0.314782	0.283266	1416	0.266646	0.966161	-0.177828	0.240574	1386	0.459922	0.967971	-0.282036	0.363695	1388	0.438192	0.991747
BMI	rs12049202	1	77967523	T	C	0.024	1e-28	691566	0.1752	0.166416	0.332862	1405	0.617186	0.952961	-0.250313	0.190562	1367	0.18922	0.943145	-0.0047057	0.208057	1372	0.981959	0.997535	0.183731	0.285612	1416	0.520142	0.966161	-0.17821	0.242194	1386	0.461967	0.967971	-0.204896	0.366835	1388	0.576558	0.991747
BMI	rs1402025	5	113987898	C	T	0.0121	3.6e-09	690061	0.2051	0.16068	0.330565	1405	0.626989	0.954904	-0.283503	0.190697	1367	0.137337	0.943145	-0.170977	0.206498	1372	0.407826	0.984915	0.321808	0.284254	1416	0.257779	0.966161	0.178474	0.24319	1386	0.463142	0.967971	0.0708451	0.365083	1388	0.846164	0.991747
BMI	rs2820311	1	201841476	G	A	0.0235	4.1e-38	691876	0.2944	0.424953	0.29012	1405	0.143215	0.916639	0.401159	0.16652	1367	0.0161262	0.730181	0.152138	0.182412	1372	0.404407	0.984915	0.42208	0.24939	1416	0.0907811	0.966161	0.154755	0.211887	1386	0.465292	0.967971	-0.208536	0.321217	1388	0.516314	0.991747
BMI	rs9530843	13	79563749	C	A	-0.0128	4.8e-13	674325	0.3508	0.62774	0.285027	1405	0.0278014	0.757624	0.0809079	0.164897	1367	0.623749	0.958742	-0.0079278	0.179304	1372	0.96474	0.997084	0.132959	0.24577	1416	0.588602	0.966161	-0.152811	0.209826	1386	0.466568	0.967971	-0.129889	0.316223	1388	0.681319	0.991747
BMI	rs12033257	1	112318484	G	A	-0.0146	2.4e-15	664083	0.3707	0.167171	0.285795	1405	0.558688	0.935331	0.0782624	0.164955	1367	0.635257	0.962576	-0.161273	0.179313	1372	0.368603	0.984915	-0.130405	0.245046	1416	0.594694	0.966161	-0.151004	0.208536	1386	0.46912	0.967971	0.08948	0.315976	1388	0.777077	0.991747
BMI	rs10842240	12	24060075	C	G	0.0218	3.1e-16	691476	0.18	0.129062	0.358312	1405	0.718756	0.973405	0.00425646	0.206929	1367	0.983592	0.997005	0.0608706	0.224369	1372	0.786204	0.990772	0.0842093	0.307239	1416	0.784061	0.966161	-0.187798	0.262771	1386	0.474927	0.967971	-0.736692	0.393595	1388	0.0614602	0.991747
BMI	rs7761673	6	70357368	A	T	-0.0126	1.9e-09	691716	0.2566	0.333726	0.314143	1405	0.288267	0.916639	-0.0201413	0.180394	1367	0.911116	0.993871	-0.0570773	0.196683	1372	0.771708	0.990772	-0.137297	0.270019	1416	0.611203	0.966161	-0.163978	0.229529	1386	0.475094	0.967971	0.484639	0.346045	1388	0.161586	0.991747
BMI	rs11855853	15	78012618	T	C	-0.0145	2.4e-13	682564	0.2104	-0.0638253	0.32773	1405	0.845617	0.981618	0.311232	0.187376	1367	0.096944	0.943145	0.282191	0.205563	1372	0.17005	0.978631	-0.0948169	0.280976	1416	0.735824	0.966161	-0.170118	0.238172	1386	0.475183	0.967971	0.17467	0.362037	1388	0.629553	0.991747
BMI	rs10733051	1	167280354	G	A	-0.0097	2.9e-09	781928	0.4439	-0.1178	0.301202	1405	0.695784	0.973405	0.13925	0.173414	1367	0.422123	0.943145	0.0514203	0.188182	1372	0.784705	0.990772	-0.0663031	0.258208	1416	0.797385	0.968016	-0.156653	0.219871	1386	0.476289	0.967971	-0.154501	0.331217	1388	0.640957	0.991747
BMI	rs2035831	3	173683791	C	G	-0.0108	5.5e-09	674163	0.3284	-0.445604	0.279166	1405	0.110672	0.875461	0.0108317	0.161388	1367	0.946499	0.997005	0.0206918	0.175276	1372	0.906044	0.996224	-0.153451	0.239326	1416	0.521512	0.966161	0.14474	0.203923	1386	0.477963	0.967971	0.223989	0.307371	1388	0.466295	0.991747
BMI	rs13085471	3	108359880	T	C	0.0107	8e-10	691315	0.3612	-0.336332	0.277036	1405	0.22494	0.916639	0.147761	0.159165	1367	0.35339	0.943145	0.267369	0.173524	1372	0.123593	0.978631	0.140255	0.237855	1416	0.555509	0.966161	-0.142985	0.202048	1386	0.479264	0.967971	-0.184063	0.30561	1388	0.547086	0.991747
BMI	rs9848399	3	125205106	G	A	-0.0164	2.1e-10	692421	0.1306	0.461042	0.381007	1405	0.22646	0.916639	0.228443	0.218767	1367	0.296567	0.943145	0.152391	0.239532	1372	0.524751	0.990772	0.0111346	0.328088	1416	0.972932	0.985462	-0.196994	0.278764	1386	0.47989	0.967971	0.204143	0.423224	1388	0.629633	0.991747
BMI	rs7010763	8	77342772	A	G	-0.0159	4.9e-16	677284	0.29	-0.500547	0.301208	1405	0.0967786	0.875461	0.0792382	0.172987	1367	0.646983	0.965121	-0.0604326	0.188745	1372	0.748881	0.990772	-0.306748	0.258311	1416	0.235226	0.966161	0.155274	0.219802	1386	0.480042	0.967971	-0.20675	0.3323	1388	0.533926	0.991747
BMI	rs8092503	18	52479487	G	A	0.0165	2.3e-17	777619	0.2277	0.606167	0.311528	1405	0.0518816	0.875461	-0.0145033	0.179335	1367	0.935555	0.997005	-0.123785	0.195893	1372	0.527558	0.990772	0.554327	0.267102	1416	0.0381369	0.966161	0.160378	0.22791	1386	0.481745	0.967971	0.257793	0.344778	1388	0.454764	0.991747
BMI	rs12762034	10	33969931	C	T	0.024	7.3e-14	692191	0.06048	-0.841799	0.55331	1405	0.12839	0.88977	-0.244699	0.32128	1367	0.44641	0.943145	-0.526572	0.347924	1372	0.130393	0.978631	-0.624115	0.476249	1416	0.190248	0.966161	-0.286252	0.409305	1386	0.484445	0.967971	0.119327	0.616002	1388	0.84643	0.991747
BMI	rs12150665	17	34914787	C	T	-0.0162	1.6e-22	795501	0.3362	0.0492353	0.270001	1405	0.855333	0.981618	0.0014483	0.154886	1367	0.992541	0.997005	0.129103	0.168804	1372	0.44452	0.990772	0.0238625	0.231987	1416	0.918088	0.984638	0.13769	0.197019	1386	0.484753	0.967971	0.289596	0.297509	1388	0.330525	0.991747
BMI	rs3769948	2	166186923	G	A	-0.0125	2.9e-10	692300	0.2314	-0.131157	0.314216	1405	0.676444	0.965048	0.0490588	0.181185	1367	0.786613	0.992591	0.262515	0.196576	1372	0.181957	0.978631	-0.0863199	0.270244	1416	0.749459	0.966161	-0.160852	0.230985	1386	0.486313	0.967971	0.0705794	0.347055	1388	0.838879	0.991747
BMI	rs1394879	13	62683659	C	G	0.0101	6.2e-09	692138	0.3939	-0.0745924	0.26922	1405	0.781769	0.973405	-0.0808775	0.154738	1367	0.601286	0.952555	-0.0071617	0.168373	1372	0.966079	0.997314	0.245484	0.23161	1416	0.28937	0.966161	0.137267	0.197431	1386	0.487005	0.967971	-0.0839889	0.297237	1388	0.777552	0.991747
BMI	rs10131890	14	97258752	C	A	0.0222	1.6e-08	691777	0.09742	-0.164761	0.442878	1405	0.709932	0.973405	-0.340912	0.256255	1367	0.183623	0.943145	0.145989	0.277525	1372	0.598946	0.990772	-0.351656	0.38017	1416	0.355127	0.966161	-0.22584	0.325318	1386	0.487667	0.967971	-0.0209749	0.490168	1388	0.965874	0.991747
BMI	rs11222940	11	131985721	A	C	-0.0123	2.6e-11	685436	0.3058	-0.184549	0.2949	1405	0.531547	0.924282	0.486232	0.168674	1367	0.00400546	0.644967	0.138549	0.184473	1372	0.452752	0.990772	-0.048816	0.253169	1416	0.847128	0.977203	-0.148821	0.214851	1386	0.488633	0.967971	0.297056	0.325207	1388	0.361173	0.991747
BMI	rs2726040	16	28330790	G	C	-0.0191	1.2e-28	756576	0.3655	0.29917	0.285873	1405	0.295506	0.916639	0.212139	0.164594	1367	0.197666	0.943145	-0.0177555	0.179213	1372	0.921093	0.996224	-0.090447	0.245833	1416	0.712987	0.966161	-0.144487	0.209062	1386	0.489606	0.967971	-0.135978	0.315841	1388	0.666879	0.991747
BMI	rs9326846	5	111301546	G	A	0.0108	7.1e-09	688531	0.3534	-0.190338	0.280566	1405	0.497626	0.916639	-0.126491	0.16141	1367	0.433373	0.943145	-0.0398511	0.175773	1372	0.820677	0.990772	-0.114062	0.241388	1416	0.636625	0.966161	-0.141887	0.205878	1386	0.490825	0.967971	0.163981	0.309983	1388	0.596892	0.991747
BMI	rs2414128	15	52369728	C	T	-0.0118	3.2e-11	678329	0.4173	-0.350972	0.288827	1405	0.22451	0.916639	-0.0974907	0.166172	1367	0.557514	0.952555	0.0799532	0.180887	1372	0.658556	0.990772	-0.181452	0.247973	1416	0.464449	0.966161	0.145144	0.21133	1386	0.492317	0.967971	0.104917	0.318481	1388	0.741881	0.991747
BMI	rs7124681	11	47529947	A	C	0.0263	3.2e-58	795474	0.3913	-0.233366	0.266536	1405	0.381425	0.916639	0.141398	0.154005	1367	0.35871	0.943145	0.164628	0.167276	1372	0.325208	0.978631	0.351583	0.229137	1416	0.125161	0.966161	-0.133883	0.195802	1386	0.494237	0.967971	0.26324	0.294478	1388	0.371521	0.991747
BMI	rs10144318	14	53189731	C	A	-0.0092	1.4e-08	794528	0.4792	-0.193747	0.261102	1405	0.458191	0.916639	-0.0022763	0.150046	1367	0.987898	0.997005	0.147098	0.162819	1372	0.366452	0.984915	-0.118651	0.224187	1416	0.596716	0.966161	0.130169	0.190764	1386	0.49513	0.967971	-0.135381	0.287237	1388	0.637486	0.991747
BMI	rs12443621	16	52548037	G	A	0.0096	3.2e-08	688078	0.4874	0.13124	0.256603	1405	0.609115	0.952961	0.151166	0.147486	1367	0.305569	0.943145	0.0584824	0.160306	1372	0.715305	0.990772	-0.0899987	0.220428	1416	0.683122	0.966161	-0.127714	0.187614	1386	0.496158	0.967971	-0.108074	0.282884	1388	0.702489	0.991747
BMI	rs1884897	20	6612832	A	G	-0.0194	1.3e-30	789534	0.3652	-0.151199	0.264054	1405	0.567005	0.941432	-0.157421	0.152136	1367	0.300975	0.943145	-0.435588	0.164623	1372	0.0082399	0.92974	-0.362697	0.226612	1416	0.109708	0.966161	-0.131222	0.192838	1386	0.496315	0.967971	-0.385932	0.290969	1388	0.184938	0.991747
BMI	rs11129662	3	35696096	G	A	0.0121	4.5e-11	688778	0.3467	0.263007	0.271459	1405	0.332781	0.916639	0.112916	0.15607	1367	0.469502	0.943145	-0.065608	0.169821	1372	0.699308	0.990772	0.117311	0.232648	1416	0.614168	0.966161	0.134284	0.19792	1386	0.497585	0.967971	0.00697106	0.29873	1388	0.981386	0.991747
BMI	rs12589208	14	41573132	G	A	0.0126	3.6e-08	678354	0.1456	-0.527879	0.38265	1405	0.167952	0.916639	0.522702	0.219035	1367	0.0171519	0.730181	0.739525	0.238668	1372	0.00198465	0.737441	-0.106233	0.328878	1416	0.746731	0.966161	-0.188601	0.279079	1386	0.499281	0.967971	0.0788601	0.422171	1388	0.851848	0.991747
BMI	rs2270778	3	124692689	C	T	0.0097	4.3e-09	794903	0.3609	-0.463899	0.303955	1405	0.127184	0.88977	-0.263784	0.175643	1367	0.133376	0.943145	-0.293813	0.190833	1372	0.123882	0.978631	-0.189906	0.261674	1416	0.468124	0.966161	-0.150634	0.223478	1386	0.500395	0.967971	-0.325143	0.337359	1388	0.33532	0.991747
BMI	rs40067	5	107439012	A	G	-0.0266	7.1e-30	681695	0.1478	-0.627511	0.365851	1405	0.0865297	0.875461	-0.118918	0.210038	1367	0.571369	0.952555	-0.123837	0.23024	1372	0.590761	0.990772	0.0230728	0.315091	1416	0.941637	0.984638	-0.179881	0.267116	1386	0.500795	0.967971	0.268417	0.404455	1388	0.507026	0.991747
BMI	rs4673553	2	211608379	G	T	0.0142	2.1e-16	686078	0.4286	0.16692	0.267313	1405	0.532445	0.924282	0.0932454	0.153323	1367	0.543181	0.943145	-0.0992939	0.167541	1372	0.55351	0.990772	0.337113	0.229502	1416	0.142086	0.966161	-0.1311	0.194958	1386	0.501409	0.967971	-0.443335	0.295094	1388	0.133236	0.991747
BMI	rs17236194	15	59002755	C	T	0.0153	8.3e-11	790933	0.1494	0.544814	0.382497	1405	0.154565	0.916639	0.0596899	0.219804	1367	0.786002	0.992591	0.0548285	0.240133	1372	0.819428	0.990772	0.385959	0.326075	1416	0.236751	0.966161	-0.18636	0.277404	1386	0.501824	0.967971	-0.248088	0.419865	1388	0.554702	0.991747
BMI	rs1125804	16	74148932	A	G	-0.0105	2.3e-09	674893	0.4018	-0.149728	0.294948	1405	0.611784	0.952961	0.226833	0.169256	1367	0.180412	0.943145	0.370476	0.183729	1372	0.0439523	0.92974	-0.092193	0.253401	1416	0.716046	0.966161	-0.143951	0.215404	1386	0.504063	0.967971	-0.129082	0.324255	1388	0.690628	0.991747
BMI	rs9615905	22	48875699	T	C	0.011	2.7e-10	690274	0.3795	-0.0682309	0.299199	1405	0.819645	0.975217	-0.197022	0.171783	1367	0.251616	0.943145	-0.0686793	0.187756	1372	0.714578	0.990772	-0.250623	0.257309	1416	0.330217	0.966161	0.146078	0.219025	1386	0.504919	0.967971	0.021148	0.331792	1388	0.949188	0.991747
BMI	rs11165643	1	96924097	C	T	-0.0206	1.4e-35	792657	0.4551	0.347059	0.268317	1405	0.196065	0.916639	0.124223	0.1544	1367	0.421219	0.943145	0.0255428	0.168557	1372	0.879574	0.994107	0.0431654	0.230666	1416	0.851583	0.978015	0.130749	0.19618	1386	0.505219	0.967971	0.301792	0.296752	1388	0.30934	0.991747
BMI	rs6569648	6	130349119	C	T	0.0126	3.7e-11	795618	0.1773	0.14507	0.325617	1405	0.656011	0.965048	-0.0901168	0.187206	1367	0.630327	0.958742	0.241448	0.205619	1372	0.240503	0.978631	0.0910327	0.27956	1416	0.744753	0.966161	0.156143	0.237417	1386	0.510858	0.967971	0.40884	0.361008	1388	0.257623	0.991747
BMI	rs4307239	7	24354300	A	G	-0.0115	3.9e-11	687289	0.484	-0.292658	0.258607	1405	0.257967	0.916639	-0.101356	0.149185	1367	0.497002	0.943145	0.112138	0.161754	1372	0.488264	0.990772	-0.0942326	0.221788	1416	0.670991	0.966161	-0.12409	0.189175	1386	0.511962	0.967971	-0.313482	0.284239	1388	0.270271	0.991747
BMI	rs11577094	1	38026600	T	C	0.0182	6.9e-10	779686	0.05198	-0.500514	0.585753	1405	0.392986	0.916639	0.258534	0.334116	1367	0.439192	0.943145	0.839908	0.364561	1372	0.0213794	0.92974	-0.850755	0.5016	1416	0.0900916	0.966161	0.278416	0.425069	1386	0.512584	0.967971	0.588085	0.643234	1388	0.360739	0.991747
BMI	rs17789218	6	100600097	C	T	0.013	7.4e-12	793904	0.17	-0.226063	0.423214	1405	0.593318	0.94719	-0.31076	0.244254	1367	0.203492	0.943145	-0.0357921	0.264303	1372	0.892299	0.996224	0.120806	0.363812	1416	0.739895	0.966161	0.200764	0.30993	1386	0.517239	0.967971	0.721052	0.465617	1388	0.121709	0.991747
BMI	rs7206608	16	82872628	G	C	0.0132	1.3e-12	689058	0.3174	0.133971	0.272986	1405	0.623674	0.954904	-0.193643	0.156391	1367	0.215857	0.943145	-0.180379	0.170318	1372	0.289755	0.978631	0.140212	0.234304	1416	0.549656	0.966161	-0.128926	0.199144	1386	0.517479	0.967971	-0.374346	0.300041	1388	0.212372	0.991747
BMI	rs9426003	1	34602870	A	G	-0.0116	1.4e-09	682054	0.2581	0.243728	0.313257	1405	0.436675	0.916639	-0.0281721	0.181042	1367	0.876363	0.993871	-0.214235	0.197753	1372	0.278847	0.978631	0.252486	0.269451	1416	0.3489	0.966161	0.149168	0.230632	1386	0.517883	0.967971	0.547386	0.348594	1388	0.116583	0.991747
BMI	rs2832283	21	30690558	A	G	0.0115	5.8e-09	792324	0.172	0.358513	0.379489	1405	0.344963	0.916639	0.0571739	0.217606	1367	0.79279	0.992591	-0.226487	0.237133	1372	0.339695	0.978631	-0.29006	0.326025	1416	0.373786	0.966161	-0.178592	0.276139	1386	0.517903	0.967971	-0.148943	0.417967	1388	0.721633	0.991747
BMI	rs769674	4	140881964	T	A	-0.0135	2.2e-13	685942	0.3405	0.0899933	0.320653	1405	0.779016	0.973405	-0.104326	0.184471	1367	0.571799	0.952555	-0.315017	0.20059	1372	0.116543	0.978631	-0.126573	0.275133	1416	0.645557	0.966161	0.150039	0.234034	1386	0.521566	0.967971	0.611353	0.353187	1388	0.0836832	0.991747
BMI	rs657452	1	49589847	A	G	0.0188	7.2e-29	767846	0.4349	-0.384495	0.261426	1405	0.141581	0.916639	-0.0252383	0.150801	1367	0.867111	0.993871	-0.161914	0.164227	1372	0.324348	0.978631	-0.193282	0.224806	1416	0.39006	0.966161	-0.122479	0.191574	1386	0.522713	0.967971	-0.173428	0.290136	1388	0.550106	0.991747
BMI	rs2274550	13	36229873	T	C	-0.014	1.5e-08	691463	0.1211	0.666659	0.406473	1405	0.101209	0.875461	0.19997	0.232741	1367	0.390385	0.943145	-0.225745	0.25706	1372	0.380002	0.984915	0.202473	0.34963	1416	0.562609	0.966161	0.189386	0.296408	1386	0.522971	0.967971	0.382805	0.451767	1388	0.396947	0.991747
BMI	rs6023633	20	53453850	G	A	0.0138	5.1e-11	670718	0.2043	-0.0386424	0.326916	1405	0.905924	0.98481	-0.0828629	0.187941	1367	0.659356	0.968423	0.155258	0.203851	1372	0.446418	0.990772	0.0992131	0.280779	1416	0.723879	0.966161	-0.152854	0.239341	1386	0.523162	0.967971	-0.103801	0.359669	1388	0.772929	0.991747
BMI	rs17014375	1	209543560	G	T	0.0172	1.1e-11	690856	0.1654	-0.370787	0.374378	1405	0.322148	0.916639	0.191165	0.215844	1367	0.375957	0.943145	0.460311	0.233771	1372	0.0491485	0.92974	-0.0153348	0.322099	1416	0.962035	0.985462	0.175558	0.275056	1386	0.523409	0.967971	-0.104722	0.413321	1388	0.800023	0.991747
BMI	rs12369179	12	122963550	T	C	-0.0359	2.5e-31	674260	0.06489	0.0901652	0.56173	1405	0.8725	0.98481	0.30191	0.322281	1367	0.349034	0.943145	0.860419	0.349982	1372	0.0140773	0.92974	0.517194	0.481388	1416	0.282836	0.966161	0.260729	0.410246	1386	0.525179	0.967971	0.694182	0.617882	1388	0.261427	0.991747
BMI	rs9569808	13	58631525	G	A	-0.0186	1e-19	692054	0.1973	-0.51971	0.323092	1405	0.107941	0.875461	0.0858686	0.18548	1367	0.643472	0.965121	-0.090599	0.201975	1372	0.653817	0.990772	-0.183176	0.277423	1416	0.509184	0.966161	0.149609	0.235814	1386	0.5259	0.967971	0.205545	0.355621	1388	0.563366	0.991747
BMI	rs16914051	9	28943416	T	C	-0.0145	1.1e-09	692560	0.1504	0.00778141	0.360596	1405	0.982787	0.99503	0.215235	0.207392	1367	0.299543	0.943145	0.385145	0.224811	1372	0.0869057	0.978631	-0.0715351	0.308838	1416	0.816862	0.96912	-0.166994	0.263279	1386	0.525999	0.967971	0.0709201	0.396081	1388	0.857921	0.991747
BMI	rs17203016	2	208255518	G	A	0.015	2.1e-13	786272	0.1656	0.0788173	0.348644	1405	0.821182	0.975217	-0.0203937	0.201097	1367	0.919239	0.993871	-0.295367	0.219009	1372	0.177674	0.978631	-0.319936	0.299765	1416	0.286024	0.966161	0.161682	0.255556	1386	0.527056	0.967971	-0.266743	0.385745	1388	0.489367	0.991747
BMI	rs9538141	13	59178258	G	A	-0.0164	3.5e-21	676674	0.492	-0.396489	0.262252	1405	0.130796	0.899475	0.033113	0.150737	1367	0.826158	0.993871	-0.118263	0.164705	1372	0.472863	0.990772	0.0740218	0.225148	1416	0.742379	0.966161	-0.120766	0.191175	1386	0.527685	0.967971	0.170517	0.289615	1388	0.556112	0.991747
BMI	rs2119753	2	151224579	G	A	-0.0102	6.8e-09	684462	0.3352	0.70334	0.297747	1405	0.0183033	0.757624	0.240961	0.171803	1367	0.160983	0.943145	0.132078	0.187216	1372	0.480629	0.990772	0.343018	0.256337	1416	0.181064	0.966161	0.137837	0.218396	1386	0.528059	0.967971	0.298896	0.329887	1388	0.365065	0.991747
BMI	rs1476322	3	161446055	G	A	-0.0101	5e-09	692523	0.4129	-0.0732771	0.272566	1405	0.788091	0.973405	-0.221705	0.156449	1367	0.156682	0.943145	-0.0948319	0.170074	1372	0.577215	0.990772	0.164028	0.233838	1416	0.483131	0.966161	0.12554	0.198956	1386	0.528151	0.967971	0.0146624	0.299847	1388	0.961007	0.991747
BMI	rs1452075	3	62481063	C	T	-0.0141	1.3e-14	783729	0.2681	0.237005	0.293361	1405	0.419289	0.916639	-0.0512259	0.167901	1367	0.76034	0.982546	-0.0578498	0.184755	1372	0.754241	0.990772	0.137783	0.252399	1416	0.585226	0.966161	-0.135055	0.214094	1386	0.528262	0.967971	-0.312549	0.325699	1388	0.337413	0.991747
BMI	rs7607369	2	219279097	A	G	0.0117	9.3e-13	790384	0.4904	0.380379	0.266318	1405	0.153434	0.916639	0.0708016	0.152339	1367	0.642175	0.965121	0.0165185	0.166463	1372	0.920969	0.996224	0.160123	0.228795	1416	0.484134	0.966161	0.122039	0.193547	1386	0.528446	0.967971	0.0919282	0.29333	1388	0.754028	0.991747
BMI	rs4757144	11	13331226	G	A	-0.0169	5.6e-22	690082	0.4864	-0.0093402	0.270165	1405	0.972426	0.992802	0.0394021	0.155521	1367	0.800032	0.992591	-0.0964245	0.168483	1372	0.567208	0.990772	-0.0843525	0.231847	1416	0.716041	0.966161	-0.123941	0.19774	1386	0.530903	0.967971	-0.232103	0.29646	1388	0.433812	0.991747
BMI	rs11128904	3	18742270	G	C	-0.0106	4.5e-08	691222	0.2586	-0.0423665	0.290973	1405	0.884256	0.98481	0.267589	0.167018	1367	0.109355	0.943145	-0.137005	0.182426	1372	0.452774	0.990772	0.110962	0.2501	1416	0.657351	0.966161	0.133296	0.212793	1386	0.531149	0.967971	-0.241014	0.321629	1388	0.453773	0.991747
BMI	rs189843	5	164600151	G	C	0.0098	1.7e-08	685314	0.4367	-0.139861	0.269059	1405	0.603274	0.94952	0.208032	0.154558	1367	0.178536	0.943145	0.260562	0.168978	1372	0.12331	0.978631	0.176161	0.230719	1416	0.445275	0.966161	-0.122934	0.196294	1386	0.531237	0.967971	0.0832919	0.29693	1388	0.779128	0.991747
BMI	rs17695092	5	173337853	G	T	-0.0106	3.4e-09	775102	0.2471	-0.187167	0.299474	1405	0.532084	0.924282	0.0341317	0.172338	1367	0.843035	0.993871	-0.142086	0.186874	1372	0.447192	0.990772	0.0450544	0.257264	1416	0.861003	0.979034	0.136687	0.218564	1386	0.531822	0.967971	0.161905	0.329652	1388	0.623407	0.991747
BMI	rs11630240	15	73645403	A	G	-0.0239	1.7e-12	678695	0.06064	0.189998	0.573096	1405	0.740295	0.973405	0.28669	0.334024	1367	0.390883	0.943145	0.248662	0.360989	1372	0.491045	0.990772	0.929969	0.493359	1416	0.0596397	0.966161	0.266252	0.426243	1386	0.532306	0.967971	0.5781	0.639408	1388	0.366091	0.991747
BMI	rs2237403	7	39448936	T	C	-0.0121	3.3e-11	692017	0.3338	0.102769	0.275552	1405	0.709236	0.973405	0.238877	0.157826	1367	0.130375	0.943145	0.357531	0.172202	1372	0.0380602	0.92974	0.0855051	0.236814	1416	0.718105	0.966161	-0.125486	0.201171	1386	0.532876	0.967971	0.0955471	0.303837	1388	0.753213	0.991747
BMI	rs2876248	20	12700157	C	T	-0.0105	6.2e-09	688475	0.4475	0.00973498	0.270165	1405	0.971261	0.992802	-0.14644	0.155041	1367	0.345072	0.943145	0.0964146	0.16898	1372	0.568387	0.990772	-0.135174	0.232509	1416	0.561083	0.966161	-0.122094	0.197857	1386	0.537284	0.967971	0.0563241	0.298842	1388	0.850532	0.991747
BMI	rs7332115	13	33147548	G	T	-0.0159	3.6e-21	795567	0.3663	0.200364	0.268515	1405	0.455676	0.916639	-0.060274	0.153981	1367	0.695535	0.97304	-0.0647514	0.168252	1372	0.700411	0.990772	-0.0328102	0.230447	1416	0.886803	0.982786	-0.119878	0.195616	1386	0.540096	0.967971	0.0814667	0.295999	1388	0.783184	0.991747
BMI	rs4482463	2	205375909	C	A	0.0331	2.8e-23	635414	0.1187	0.444968	0.452943	1405	0.326077	0.916639	-0.482037	0.2589	1367	0.0628385	0.943145	-0.155852	0.28293	1372	0.581827	0.990772	0.296418	0.388487	1416	0.445588	0.966161	-0.201958	0.329802	1386	0.5404	0.967971	-0.335656	0.498732	1388	0.501048	0.991747
BMI	rs2063177	2	41712849	A	G	0.012	1.6e-11	687196	0.3086	-0.684971	0.276493	1405	0.013354	0.757624	-0.224376	0.159515	1367	0.159772	0.943145	0.0059855	0.174268	1372	0.972606	0.997535	-0.200139	0.237991	1416	0.400518	0.966161	-0.124065	0.202755	1386	0.540706	0.967971	0.129564	0.306829	1388	0.672896	0.991747
BMI	rs1412235	9	28410996	C	G	0.0246	6e-45	790147	0.2924	-0.351183	0.288208	1405	0.223238	0.916639	-0.148878	0.166085	1367	0.3702	0.943145	-0.0930323	0.180515	1372	0.606378	0.990772	-0.505381	0.247723	1416	0.0415262	0.966161	-0.129355	0.211417	1386	0.54074	0.967971	-0.0197499	0.318478	1388	0.950561	0.991747
BMI	rs11001963	10	78760959	C	T	-0.0108	1.2e-09	678263	0.449	-0.248186	0.266578	1405	0.352011	0.916639	0.0807855	0.15342	1367	0.598582	0.952555	-0.0376186	0.167124	1372	0.82194	0.990772	-0.11988	0.229587	1416	0.601645	0.966161	0.119527	0.195484	1386	0.541007	0.967971	0.330542	0.294858	1388	0.262474	0.991747
BMI	rs10779751	1	11284336	A	G	0.0139	2.5e-14	794997	0.3181	-0.255867	0.287045	1405	0.372876	0.916639	0.0795949	0.164901	1367	0.629399	0.958742	-0.0088087	0.180431	1372	0.96107	0.997084	-0.0665786	0.246234	1416	0.786902	0.966161	-0.127405	0.209313	1386	0.542836	0.967971	0.00734016	0.317265	1388	0.981545	0.991747
BMI	rs17056301	5	158271680	C	T	0.0118	2.4e-09	688085	0.2435	-0.152545	0.328662	1405	0.642621	0.959084	0.211643	0.188809	1367	0.262516	0.943145	-0.0726694	0.205435	1372	0.723593	0.990772	0.00966468	0.282435	1416	0.972707	0.985462	0.146036	0.240414	1386	0.543661	0.967971	-0.257703	0.362465	1388	0.47722	0.991747
BMI	rs1483121	11	48333360	A	G	-0.0169	5.3e-13	789455	0.1172	-0.0839063	0.39964	1405	0.833734	0.979776	-0.0804627	0.229659	1367	0.726125	0.97979	-0.148346	0.250032	1372	0.553075	0.990772	-0.32538	0.343218	1416	0.343279	0.966161	0.176285	0.29107	1386	0.544852	0.967971	0.0702679	0.441229	1388	0.873491	0.991747
BMI	rs13079205	3	135800693	G	A	0.0154	3.7e-15	685558	0.2102	0.1642	0.322029	1405	0.610207	0.952961	-0.166695	0.184008	1367	0.365144	0.943145	-0.112355	0.200812	1372	0.57591	0.990772	0.102981	0.277135	1416	0.710253	0.966161	-0.141244	0.234768	1386	0.547517	0.967971	0.54483	0.354558	1388	0.12461	0.991747
BMI	rs16851483	3	141275436	T	G	0.0369	3.2e-26	692316	0.08238	-0.183431	0.495527	1405	0.711309	0.973405	-0.524588	0.283947	1367	0.0648953	0.943145	-0.391441	0.30911	1372	0.205606	0.978631	-0.0462549	0.427288	1416	0.913811	0.984638	-0.216603	0.363599	1386	0.551462	0.967971	-0.375419	0.547286	1388	0.492851	0.991747
BMI	rs6482729	10	131120802	C	T	0.0102	3.6e-08	676977	0.3267	0.0743329	0.279027	1405	0.78997	0.973405	-0.0013976	0.161056	1367	0.993077	0.997005	0.234083	0.173843	1372	0.17836	0.978631	0.129326	0.239825	1416	0.589799	0.966161	-0.121788	0.204822	1386	0.552204	0.967971	0.290412	0.307062	1388	0.344429	0.991747
BMI	rs13208757	6	101175014	T	C	0.0113	5.4e-11	684643	0.4936	-0.0682051	0.2646	1405	0.796625	0.973405	0.144441	0.15202	1367	0.342206	0.943145	0.0777703	0.165256	1372	0.638	0.990772	-0.0091726	0.2276	1416	0.967859	0.985462	-0.115071	0.193753	1386	0.552674	0.967971	-0.101866	0.291746	1388	0.727024	0.991747
BMI	rs7730004	5	43191033	C	T	-0.0148	9.1e-16	690164	0.3338	0.453377	0.286902	1405	0.114277	0.87976	0.0832774	0.164946	1367	0.613727	0.952555	0.110423	0.179838	1372	0.539308	0.990772	0.339479	0.246131	1416	0.168035	0.966161	0.124136	0.209359	1386	0.553322	0.967971	0.492249	0.316131	1388	0.119676	0.991747
BMI	rs4703019	5	102053558	A	G	0.0101	1e-09	794152	0.375	0.20652	0.277342	1405	0.456614	0.916639	-0.230087	0.159845	1367	0.150258	0.943145	-0.010989	0.173977	1372	0.949646	0.996224	0.474665	0.238066	1416	0.0463627	0.966161	0.120519	0.203735	1386	0.554252	0.967971	-0.0313332	0.30661	1388	0.918619	0.991747
BMI	rs7941030	11	122522375	C	T	0.0112	2e-11	795457	0.3764	-0.465316	0.266817	1405	0.0813877	0.875461	0.0537671	0.153754	1367	0.726622	0.97979	0.0570259	0.167263	1372	0.733206	0.990772	-0.0990943	0.230046	1416	0.66671	0.966161	0.115777	0.195913	1386	0.554644	0.967971	-0.138476	0.295009	1388	0.63886	0.991747
BMI	rs16966801	17	39573713	G	A	0.0156	1.1e-12	692286	0.2442	0.107799	0.299433	1405	0.718893	0.973405	0.182937	0.171906	1367	0.287442	0.943145	0.0187886	0.188836	1372	0.920759	0.996224	0.251122	0.256821	1416	0.328337	0.966161	0.128561	0.217847	1386	0.55519	0.967971	0.235463	0.332795	1388	0.479356	0.991747
BMI	rs7601895	2	55281901	G	C	-0.0149	1.7e-15	679924	0.296	0.211807	0.287726	1405	0.461769	0.916639	0.285385	0.165461	1367	0.0847949	0.943145	-0.0240095	0.179814	1372	0.893799	0.996224	0.11859	0.246836	1416	0.630988	0.966161	0.123468	0.209933	1386	0.55654	0.967971	0.0754718	0.316871	1388	0.811778	0.991747
BMI	rs7827182	8	8380471	G	C	-0.0177	1.7e-22	582727	0.4423	-0.146091	0.271918	1405	0.591173	0.94719	0.134877	0.155925	1367	0.387185	0.943145	0.202166	0.17084	1372	0.23687	0.978631	0.216042	0.233519	1416	0.355041	0.966161	-0.115141	0.198387	1386	0.56175	0.967971	-0.298825	0.300949	1388	0.320912	0.991747
BMI	rs298563	5	17276986	T	C	0.0127	4.6e-08	683103	0.2077	-0.325648	0.351181	1405	0.353934	0.916639	0.143218	0.2019	1367	0.478228	0.943145	-0.192351	0.219479	1372	0.380969	0.984915	0.0384969	0.301208	1416	0.898319	0.984638	0.148613	0.256537	1386	0.562479	0.967971	0.448832	0.386128	1388	0.245277	0.991747
BMI	rs1819844	12	68205604	A	G	0.0143	2.6e-11	793238	0.1662	0.435825	0.35319	1405	0.217424	0.916639	0.245495	0.202463	1367	0.225517	0.943145	-0.122934	0.220159	1372	0.576672	0.990772	0.199686	0.302986	1416	0.509964	0.966161	-0.148771	0.256984	1386	0.562743	0.967971	-0.142065	0.387787	1388	0.714162	0.991747
BMI	rs1020548	6	56810539	G	A	0.0132	6.6e-09	688748	0.1536	-0.29889	0.373756	1405	0.424025	0.916639	-0.0490892	0.215974	1367	0.820231	0.993871	-0.0142611	0.233227	1372	0.951251	0.996224	0.175822	0.318529	1416	0.58105	0.966161	-0.156854	0.272085	1386	0.56438	0.967971	-0.213714	0.407995	1388	0.600492	0.991747
BMI	rs1468069	10	98988759	A	C	0.0104	8.5e-09	691817	0.4062	0.575942	0.274808	1405	0.03628	0.853536	-0.159772	0.157778	1367	0.311415	0.943145	-0.131293	0.172701	1372	0.447246	0.990772	0.27634	0.236569	1416	0.242957	0.966161	-0.115777	0.200876	1386	0.564465	0.967971	-0.119482	0.304434	1388	0.694769	0.991747
BMI	rs2245368	7	76608143	C	T	0.0257	4.9e-28	678119	0.2135	-0.202066	0.320812	1405	0.52889	0.924282	0.137132	0.184452	1367	0.457333	0.943145	0.0176025	0.200748	1372	0.93014	0.996224	-0.207072	0.276139	1416	0.45345	0.966161	-0.134996	0.235285	1386	0.566228	0.967971	0.278821	0.353905	1388	0.430926	0.991747
BMI	rs223391	4	103748224	A	G	-0.0131	1.6e-10	793455	0.1764	-0.329838	0.382432	1405	0.388574	0.916639	-0.393169	0.219642	1367	0.0736705	0.943145	-0.438474	0.238451	1372	0.0661568	0.978631	-0.348557	0.328796	1416	0.289281	0.966161	0.160708	0.280275	1386	0.566471	0.967971	0.0893456	0.421887	1388	0.832313	0.991747
BMI	rs825680	16	73606563	T	A	-0.0104	6.7e-09	680731	0.3496	-0.526043	0.291861	1405	0.0717026	0.875461	-0.0284452	0.167733	1367	0.865361	0.993871	0.196128	0.182924	1372	0.283829	0.978631	-0.396645	0.250585	1416	0.113674	0.966161	0.121634	0.213294	1386	0.568591	0.967971	0.11777	0.322199	1388	0.714779	0.991747
BMI	rs1829130	15	76107730	C	T	0.011	3.7e-09	689024	0.2913	-0.465891	0.303996	1405	0.125613	0.88977	-0.070843	0.175	1367	0.685676	0.972051	-0.0090236	0.19008	1372	0.962143	0.997084	-0.249488	0.261637	1416	0.340468	0.966161	-0.126158	0.223122	1386	0.57188	0.967971	-0.217702	0.335689	1388	0.516754	0.991747
BMI	rs7730898	5	170459675	G	A	-0.0168	4.5e-20	792975	0.2653	-0.0555059	0.29981	1405	0.853149	0.981618	0.0314269	0.172253	1367	0.85526	0.993871	-7.87e-05	0.188704	1372	0.999667	0.999826	-0.0557988	0.257038	1416	0.828174	0.96912	-0.122941	0.218799	1386	0.574281	0.967971	0.121468	0.332396	1388	0.714844	0.991747
BMI	rs765875	6	143185683	T	C	-0.0121	3e-12	690961	0.439	0.0829581	0.265016	1405	0.754304	0.973405	0.343194	0.152067	1367	0.0241762	0.800501	-0.0087963	0.165791	1372	0.957695	0.996224	0.0316596	0.227507	1416	0.889345	0.982786	0.108136	0.193734	1386	0.57682	0.967971	-0.18185	0.292572	1388	0.534337	0.991747
BMI	rs11121210	1	8708529	T	C	-0.0108	1.3e-09	691172	0.3828	-0.25076	0.28928	1405	0.386177	0.916639	0.131734	0.165668	1367	0.426657	0.943145	-0.093282	0.180965	1372	0.606308	0.990772	-0.304196	0.248792	1416	0.221651	0.966161	-0.117349	0.211097	1386	0.578368	0.967971	0.0365792	0.319669	1388	0.908915	0.991747
BMI	rs13012099	2	47010742	A	G	-0.014	1.2e-14	686541	0.3091	-0.0830529	0.286786	1405	0.772166	0.973405	0.15136	0.164661	1367	0.358145	0.943145	0.409258	0.179179	1372	0.022521	0.92974	-0.0769827	0.24623	1416	0.754597	0.966161	-0.116363	0.209731	1386	0.57911	0.967971	0.00926529	0.316451	1388	0.976647	0.991747
BMI	rs11643673	16	71353719	A	G	0.0107	2.5e-09	679197	0.2865	0.636453	0.3033	1405	0.0360472	0.853536	0.0775328	0.174336	1367	0.656584	0.968423	0.0726763	0.189868	1372	0.701949	0.990772	0.32295	0.261033	1416	0.216219	0.966161	0.122915	0.222016	1386	0.579921	0.967971	-0.326351	0.334528	1388	0.329456	0.991747
BMI	rs6047046	20	2129907	A	G	0.0098	1.8e-08	682140	0.4907	-0.320576	0.261359	1405	0.220189	0.916639	-0.194111	0.15088	1367	0.198477	0.943145	-0.173264	0.163969	1372	0.290845	0.978631	-0.389355	0.224453	1416	0.0830158	0.966161	0.106213	0.192032	1386	0.580285	0.967971	0.240549	0.288866	1388	0.405137	0.991747
BMI	rs1455137	4	145986668	C	A	0.0106	4.4e-10	792826	0.3179	0.17222	0.27902	1405	0.537183	0.9289	0.164764	0.160416	1367	0.304554	0.943145	-0.002814	0.174552	1372	0.98714	0.997535	0.367366	0.239506	1416	0.125292	0.966161	0.112493	0.204211	1386	0.581814	0.967971	-0.311451	0.307651	1388	0.311548	0.991747
BMI	rs2074613	5	139714564	C	T	-0.0111	1.7e-10	689896	0.4175	0.164017	0.306552	1405	0.592709	0.94719	-0.261771	0.175824	1367	0.136769	0.943145	-0.117733	0.192003	1372	0.539857	0.990772	0.153838	0.263478	1416	0.559399	0.966161	-0.123318	0.223924	1386	0.58192	0.967971	-0.244436	0.338454	1388	0.470286	0.991747
BMI	rs1557672	16	30510571	T	C	-0.0114	7.3e-11	779034	0.3061	-0.20653	0.307379	1405	0.501754	0.916639	-0.204518	0.176923	1367	0.247896	0.943145	-0.672037	0.191363	1372	0.00045961	0.410892	-0.0950402	0.264359	1416	0.719266	0.966161	-0.123465	0.224614	1386	0.582631	0.967971	0.259264	0.339397	1388	0.44506	0.991747
BMI	rs7024334	9	109072075	T	G	0.0138	3.1e-12	782431	0.22	-0.132127	0.326911	1405	0.686151	0.969427	-0.172662	0.190106	1367	0.363911	0.943145	0.374206	0.204236	1372	0.067138	0.978631	-0.206185	0.280534	1416	0.462479	0.966161	-0.132144	0.24096	1386	0.5835	0.967971	-0.322764	0.360287	1388	0.370487	0.991747
BMI	rs17820822	9	11831420	G	T	-0.0143	2.9e-15	690065	0.2903	0.0377695	0.310704	1405	0.903264	0.98481	-0.0272852	0.178827	1367	0.878754	0.993871	0.212891	0.194796	1372	0.274636	0.978631	0.4156	0.267027	1416	0.119839	0.966161	-0.124457	0.22744	1386	0.584324	0.967971	-0.015913	0.344184	1388	0.96313	0.991747
BMI	rs1853639	6	87606842	G	A	0.0111	1.2e-09	673714	0.3655	0.676947	0.284941	1405	0.0176481	0.757624	-0.106663	0.164576	1367	0.517025	0.943145	-0.01585	0.179047	1372	0.929473	0.996224	0.709861	0.244051	1416	0.00368693	0.966161	-0.114214	0.208932	1386	0.584704	0.967971	-0.112046	0.315183	1388	0.722272	0.991747
BMI	rs2283093	7	126721231	T	C	0.0127	3.1e-09	691773	0.1715	0.796431	0.333626	1405	0.0171101	0.757624	-0.209979	0.191876	1367	0.273999	0.943145	0.0450526	0.209585	1372	0.82983	0.990772	0.658149	0.286404	1416	0.0217094	0.966161	0.133315	0.243972	1386	0.584854	0.967971	0.150655	0.369271	1388	0.683353	0.991747
BMI	rs7144011	14	79940383	T	G	0.0282	5.2e-47	794117	0.2115	0.338646	0.319746	1405	0.289734	0.916639	0.0957279	0.185148	1367	0.605218	0.952555	0.321221	0.201093	1372	0.110416	0.978631	-0.128294	0.275163	1416	0.641111	0.966161	-0.128654	0.235529	1386	0.584993	0.967971	-0.380384	0.354232	1388	0.283089	0.991747
BMI	rs6764533	3	196088464	A	G	0.0116	1.4e-10	690832	0.3571	-0.328441	0.276545	1405	0.23517	0.916639	-0.029774	0.158466	1367	0.850992	0.993871	0.344879	0.173842	1372	0.0474715	0.92974	-0.11894	0.23747	1416	0.616544	0.966161	-0.109963	0.201485	1386	0.585319	0.967971	-0.170721	0.306814	1388	0.578005	0.991747
BMI	rs4880341	10	133992689	C	T	0.0118	1.1e-11	689012	0.4255	0.101069	0.266232	1405	0.704281	0.973405	0.0280913	0.153041	1367	0.854391	0.993871	-0.254575	0.166705	1372	0.12697	0.978631	-0.13144	0.229116	1416	0.566273	0.966161	-0.106138	0.194617	1386	0.585589	0.967971	0.375149	0.294364	1388	0.202723	0.991747
BMI	rs8007908	14	46838144	A	G	-0.0111	1.2e-10	692353	0.4403	-0.38544	0.269655	1405	0.153118	0.916639	-0.0647317	0.154861	1367	0.676014	0.972051	-0.160109	0.168772	1372	0.342956	0.978631	-0.0146102	0.232234	1416	0.949846	0.984638	-0.107367	0.197235	1386	0.586282	0.967971	-0.45734	0.297354	1388	0.12427	0.991747
BMI	rs155510	6	104805862	G	T	-0.0165	1.7e-14	692226	0.1551	0.287566	0.384101	1405	0.45418	0.916639	0.435409	0.220433	1367	0.0484435	0.943145	0.0554237	0.24152	1372	0.818531	0.990772	-0.0276938	0.329519	1416	0.933034	0.984638	0.152053	0.280023	1386	0.587215	0.967971	0.123789	0.425285	1388	0.771039	0.991747
BMI	rs11206436	1	40078447	C	T	-0.0166	1.3e-09	679366	0.1125	-0.0509029	0.426441	1405	0.905002	0.98481	-0.0024118	0.245531	1367	0.992164	0.997005	0.101407	0.266622	1372	0.703751	0.990772	-0.136628	0.3667	1416	0.709512	0.966161	-0.170034	0.31322	1386	0.587316	0.967971	0.056106	0.47099	1388	0.905195	0.991747
BMI	rs3813680	6	24848086	G	A	-0.0144	1.6e-09	692399	0.1157	-0.303635	0.415395	1405	0.46493	0.916639	0.0310468	0.238215	1367	0.896324	0.993871	-0.0009437	0.25961	1372	0.9971	0.999826	-0.679593	0.357244	1416	0.0573332	0.966161	0.165082	0.304189	1386	0.587427	0.967971	0.124788	0.459323	1388	0.78591	0.991747
BMI	rs2890652	2	142959931	C	T	0.017	2.5e-13	674785	0.18	0.239351	0.332744	1405	0.472062	0.916639	0.0558439	0.1911	1367	0.77016	0.985072	-0.0293228	0.208252	1372	0.888045	0.996224	-0.177753	0.285284	1416	0.533338	0.966161	-0.131358	0.24231	1386	0.587831	0.967971	-0.496816	0.366005	1388	0.174876	0.991747
BMI	rs543874	1	177889480	G	A	0.0475	1.2e-122	795504	0.2064	-0.091898	0.32553	1405	0.777753	0.973405	-0.064746	0.187527	1367	0.729951	0.981318	-0.0971205	0.203375	1372	0.633051	0.990772	-0.0806035	0.278492	1416	0.772297	0.966161	-0.128777	0.23762	1386	0.587945	0.967971	0.0663482	0.357219	1388	0.85268	0.991747
BMI	rs1964927	21	42653237	A	G	-0.0124	5e-12	685665	0.3547	-0.295242	0.271195	1405	0.276487	0.916639	0.0718352	0.156134	1367	0.645528	0.965121	0.10679	0.169818	1372	0.529554	0.990772	-0.0837362	0.233262	1416	0.719665	0.966161	0.106678	0.198252	1386	0.590599	0.967971	-0.140487	0.299186	1388	0.638741	0.991747
BMI	rs6901756	6	41825590	C	T	-0.0146	2.9e-09	795378	0.11	0.0762634	0.434908	1405	0.860826	0.981618	0.0269322	0.248777	1367	0.913807	0.993871	-0.227744	0.271146	1372	0.401094	0.984915	0.290506	0.373877	1416	0.437285	0.966161	-0.170615	0.317463	1386	0.591056	0.967971	-0.190345	0.479543	1388	0.69148	0.991747
BMI	rs13110266	4	162129844	A	G	-0.0117	1.9e-12	791087	0.3815	-0.47124	0.280153	1405	0.0927772	0.875461	0.117752	0.16182	1367	0.466939	0.943145	-0.0098141	0.176077	1372	0.955559	0.996224	-0.0181535	0.240317	1416	0.939796	0.984638	-0.10994	0.204817	1386	0.591511	0.967971	0.30427	0.308504	1388	0.32417	0.991747
BMI	rs9463175	6	9510030	T	C	-0.0108	4.2e-10	771669	0.3856	-0.558512	0.280337	1405	0.0465341	0.869587	0.208102	0.161526	1367	0.197844	0.943145	0.0420853	0.175867	1372	0.810908	0.990772	-0.268307	0.241446	1416	0.266651	0.966161	-0.110228	0.20581	1386	0.592335	0.967971	-0.0217003	0.310202	1388	0.944239	0.991747
BMI	rs7006629	8	87519542	C	T	-0.0109	2.5e-10	691635	0.4748	0.155112	0.263783	1405	0.556608	0.935331	-0.362318	0.15159	1367	0.0169792	0.730181	0.0277997	0.165067	1372	0.866282	0.993096	0.0535156	0.22627	1416	0.81307	0.96912	-0.10309	0.19259	1386	0.592543	0.967971	-0.0740257	0.290384	1388	0.79882	0.991747
BMI	rs12564992	1	174478100	G	A	0.0196	5.3e-14	795119	0.09366	-1.02292	0.451799	1405	0.023721	0.757624	-0.0765682	0.262075	1367	0.770208	0.985072	-0.208346	0.284061	1372	0.463407	0.990772	-0.450096	0.388984	1416	0.247425	0.966161	-0.177019	0.330812	1386	0.592665	0.967971	0.361756	0.499824	1388	0.469332	0.991747
BMI	rs1421334	8	30865733	A	C	0.0125	1e-12	680665	0.4804	-0.151231	0.277551	1405	0.585926	0.94719	-0.0859212	0.159276	1367	0.589666	0.952555	-0.0793521	0.174208	1372	0.64882	0.990772	-0.0813898	0.238164	1416	0.732599	0.966161	-0.108171	0.202264	1386	0.592876	0.967971	-0.360018	0.306596	1388	0.240501	0.991747
BMI	rs11904490	2	182584021	A	C	-0.0099	3.7e-08	679650	0.3303	0.249875	0.312005	1405	0.423345	0.916639	-0.148074	0.180044	1367	0.410974	0.943145	-0.0559654	0.195871	1372	0.775132	0.990772	0.328681	0.267988	1416	0.220224	0.966161	-0.122106	0.228595	1386	0.593318	0.967971	0.0711321	0.34497	1388	0.836667	0.991747
BMI	rs2523586	6	31327435	G	T	-0.0145	8.3e-14	679129	0.2234	-0.0264006	0.313802	1405	0.932964	0.985898	0.0873178	0.181787	1367	0.63107	0.958742	0.161362	0.195722	1372	0.409831	0.984915	0.135052	0.269789	1416	0.616742	0.966161	-0.123103	0.231545	1386	0.595049	0.967971	-0.21655	0.345743	1388	0.531201	0.991747
BMI	rs9389942	6	142010889	T	C	0.0115	1.5e-08	690401	0.2403	-0.494768	0.305446	1405	0.105496	0.875461	0.130877	0.176306	1367	0.458016	0.943145	-0.0761989	0.191713	1372	0.691088	0.990772	-0.446541	0.262669	1416	0.0893501	0.966161	0.118755	0.223777	1386	0.595724	0.967971	0.463832	0.33813	1388	0.170362	0.991747
BMI	rs9989141	14	94006257	C	T	-0.0162	3.6e-21	752768	0.3701	0.245962	0.265199	1405	0.353846	0.916639	0.0592802	0.152687	1367	0.697895	0.97304	0.00012548	0.165687	1372	0.999396	0.999826	-0.130166	0.22757	1416	0.567425	0.966161	0.102048	0.193818	1386	0.598617	0.967971	0.208882	0.291699	1388	0.47406	0.991747
BMI	rs4953577	2	42935961	C	T	-0.0099	9.9e-09	689607	0.3699	-0.109355	0.276343	1405	0.69237	0.973238	-0.0479051	0.15894	1367	0.763154	0.982546	-0.344112	0.172599	1372	0.0463844	0.92974	-0.14455	0.237426	1416	0.542741	0.966161	0.106428	0.202353	1386	0.599006	0.967971	0.0967503	0.30525	1388	0.751327	0.991747
BMI	rs7138803	12	50247468	A	G	0.03	2.3e-71	795588	0.3432	0.506916	0.279991	1405	0.0704376	0.875461	-0.111206	0.162263	1367	0.493244	0.943145	-0.277759	0.175124	1372	0.112957	0.978631	0.223363	0.240304	1416	0.352789	0.966161	0.107945	0.205816	1386	0.600033	0.967971	0.290309	0.308261	1388	0.34648	0.991747
BMI	rs2543132	8	15536311	G	C	-0.0146	5e-11	688326	0.2189	-0.285045	0.317575	1405	0.369571	0.916639	0.150043	0.182348	1367	0.410746	0.943145	0.13575	0.198336	1372	0.493812	0.990772	-0.383948	0.273152	1416	0.160058	0.966161	0.12139	0.232655	1386	0.601922	0.967971	-0.427396	0.35039	1388	0.222759	0.991747
BMI	rs12476772	2	60203917	A	C	0.0123	8.3e-12	690595	0.3248	0.303993	0.281962	1405	0.281161	0.916639	-0.367586	0.161678	1367	0.0231482	0.795942	-0.189752	0.176233	1372	0.281801	0.978631	-0.0786854	0.242153	1416	0.745274	0.966161	-0.107011	0.205692	1386	0.602972	0.967971	-0.0110111	0.310081	1388	0.971678	0.991747
BMI	rs10160701	11	46551918	T	C	0.0136	6e-10	795250	0.2161	0.316699	0.339046	1405	0.35042	0.916639	-0.135363	0.194775	1367	0.487193	0.943145	-0.212185	0.213954	1372	0.321506	0.978631	0.129117	0.290091	1416	0.656323	0.966161	0.127957	0.246827	1386	0.604256	0.967971	0.0209519	0.374086	1388	0.955343	0.991747
BMI	rs2850969	4	102183594	C	T	0.0165	1.3e-11	691825	0.1906	0.169044	0.358285	1405	0.637134	0.957887	-0.0112041	0.206543	1367	0.956747	0.997005	0.0697673	0.224294	1372	0.755808	0.990772	-0.186902	0.30751	1416	0.543423	0.966161	-0.135482	0.261577	1386	0.604582	0.967971	0.113539	0.395164	1388	0.773911	0.991747
BMI	rs17535749	3	10027724	A	G	0.015	2.5e-08	777038	0.08516	-0.268068	0.48097	1405	0.577379	0.94719	-0.0799699	0.275459	1367	0.77162	0.985469	-0.588079	0.300598	1372	0.0506269	0.92974	-0.702654	0.413546	1416	0.0895229	0.966161	0.18211	0.351835	1386	0.604821	0.967971	-0.505869	0.532367	1388	0.342164	0.991747
BMI	rs4523610	10	122069448	C	T	0.0123	1.3e-09	686905	0.3267	-0.714157	0.302649	1405	0.0184278	0.757624	-0.0139816	0.175613	1367	0.936555	0.997005	0.120353	0.190574	1372	0.527802	0.990772	-0.270391	0.260725	1416	0.299879	0.966161	-0.115591	0.22346	1386	0.605045	0.967971	-0.0544744	0.335871	1388	0.871181	0.991747
BMI	rs1399471	12	19312221	C	G	-0.0131	2.7e-11	689884	0.3835	-0.340041	0.28893	1405	0.239437	0.916639	0.258318	0.166079	1367	0.120087	0.943145	0.0430218	0.182264	1372	0.813437	0.990772	-0.238526	0.248533	1416	0.337355	0.966161	0.109236	0.211649	1386	0.605857	0.967971	-0.261444	0.31994	1388	0.413976	0.991747
BMI	rs6707445	2	104420858	A	G	0.0128	2.1e-13	679298	0.3619	0.0556242	0.281504	1405	0.84339	0.981618	0.288523	0.161957	1367	0.0750584	0.943145	0.175967	0.176249	1372	0.318263	0.978631	0.284225	0.241835	1416	0.24008	0.966161	-0.106172	0.206242	1386	0.606781	0.967971	0.150081	0.310434	1388	0.628849	0.991747
BMI	rs6587552	1	151018861	A	G	0.0173	1.6e-17	689723	0.2788	0.366504	0.288917	1405	0.204815	0.916639	0.187797	0.166171	1367	0.258616	0.943145	-0.0793241	0.180983	1372	0.661242	0.990772	0.357282	0.248542	1416	0.150796	0.966161	0.108711	0.21198	1386	0.608149	0.967971	0.1284	0.319168	1388	0.68753	0.991747
BMI	rs223051	11	32131303	C	T	-0.0112	1.1e-09	689456	0.2976	-0.099293	0.285597	1405	0.728142	0.973405	-0.0508351	0.164573	1367	0.757452	0.982546	0.224621	0.178518	1372	0.208516	0.978631	-0.0449739	0.245094	1416	0.854435	0.978015	-0.106815	0.208907	1386	0.609219	0.967971	0.0632644	0.314616	1388	0.840662	0.991747
BMI	rs2710323	3	52815905	T	C	-0.0141	4.8e-18	790805	0.4631	0.208535	0.26225	1405	0.426646	0.916639	0.025455	0.150818	1367	0.865995	0.993871	0.0888952	0.16368	1372	0.587147	0.990772	-0.0139675	0.225491	1416	0.950617	0.984638	0.0981975	0.192079	1386	0.609269	0.967971	-0.051767	0.289036	1388	0.857884	0.991747
BMI	rs1048932	11	115044850	A	C	-0.016	3.8e-22	795167	0.4207	0.0380599	0.264134	1405	0.885448	0.98481	0.138418	0.15176	1367	0.361885	0.943145	0.187386	0.165136	1372	0.256686	0.978631	0.092507	0.22715	1416	0.683886	0.966161	-0.0988004	0.193523	1386	0.609758	0.967971	0.0730518	0.292031	1388	0.802508	0.991747
BMI	rs12602912	17	65870073	T	C	0.0176	9.9e-18	777510	0.2056	-0.31277	0.326462	1405	0.338199	0.916639	-0.123424	0.189171	1367	0.514223	0.943145	-0.13068	0.204471	1372	0.522858	0.990772	-0.0368109	0.28103	1416	0.895805	0.984638	0.122659	0.240498	1386	0.610119	0.967971	-0.2782	0.36132	1388	0.441458	0.991747
BMI	rs215634	7	32369148	A	G	0.0152	2.6e-17	681296	0.4519	-0.186761	0.26729	1405	0.484844	0.916639	-0.222803	0.153747	1367	0.147528	0.943145	-0.141784	0.167077	1372	0.396245	0.984915	-0.225249	0.229744	1416	0.32704	0.966161	0.0989383	0.195442	1386	0.612778	0.967971	-0.204841	0.29486	1388	0.487357	0.991747
BMI	rs11173522	12	60953472	A	C	0.0128	1.1e-09	691593	0.2739	0.372863	0.293659	1405	0.204398	0.916639	-0.121165	0.16972	1367	0.475405	0.943145	-0.265227	0.183806	1372	0.149259	0.978631	0.0902579	0.252053	1416	0.720329	0.966161	-0.109032	0.215655	1386	0.61323	0.967971	-0.177968	0.32387	1388	0.582749	0.991747
BMI	rs4802778	19	51812034	G	A	0.0116	8.4e-11	686198	0.372	0.0839829	0.292723	1405	0.77423	0.973405	-0.0282133	0.168767	1367	0.867259	0.993871	0.00399207	0.182705	1372	0.982571	0.997535	0.111445	0.251787	1416	0.658113	0.966161	0.108478	0.214755	1386	0.613554	0.967971	-0.0088709	0.322933	1388	0.978089	0.991747
BMI	rs523092	4	171082129	T	C	-0.0094	4.7e-08	687863	0.409	-0.0298323	0.27172	1405	0.912591	0.98481	-0.273024	0.156213	1367	0.0807304	0.943145	-0.0862094	0.169999	1372	0.612155	0.990772	0.00876419	0.233908	1416	0.970117	0.985462	-0.100394	0.198896	1386	0.613813	0.967971	0.0399766	0.301055	1388	0.89438	0.991747
BMI	rs3807566	7	50564204	T	G	-0.0127	2e-13	687535	0.4088	0.247083	0.260221	1405	0.342524	0.916639	-0.014761	0.149972	1367	0.921609	0.993871	-0.172097	0.162575	1372	0.289985	0.978631	0.206982	0.223108	1416	0.353712	0.966161	-0.0956489	0.190127	1386	0.61499	0.967971	0.0650641	0.286183	1388	0.820184	0.991747
BMI	rs12101393	15	92570921	G	C	-0.0127	1.5e-09	689675	0.1878	0.267831	0.339025	1405	0.42966	0.916639	-0.268046	0.194228	1367	0.167796	0.943145	-0.447725	0.212285	1372	0.0351211	0.92974	0.0421851	0.290884	1416	0.884713	0.982786	0.12372	0.247033	1386	0.616577	0.967971	-0.120777	0.37459	1388	0.74718	0.991747
BMI	rs3731695	2	203820275	T	C	-0.0116	7.9e-13	793581	0.4944	0.215753	0.272827	1405	0.429193	0.916639	-0.0894804	0.156503	1367	0.567587	0.952555	-0.163557	0.170853	1372	0.338588	0.978631	0.246172	0.234886	1416	0.294797	0.966161	0.0996145	0.199955	1386	0.618434	0.967971	0.3088	0.30193	1388	0.306603	0.991747
BMI	rs629443	13	76386075	T	G	0.0116	1.4e-09	790044	0.245	0.346794	0.307462	1405	0.259545	0.916639	-0.209252	0.177288	1367	0.238091	0.943145	-0.060652	0.191966	1372	0.752088	0.990772	0.296536	0.264512	1416	0.26245	0.966161	0.112037	0.225874	1386	0.619964	0.967971	0.307897	0.339268	1388	0.364284	0.991747
BMI	rs3845520	1	23301943	C	T	0.0192	1.1e-16	690919	0.2525	-0.399992	0.310109	1405	0.197319	0.916639	-0.005351	0.178752	1367	0.976123	0.997005	-0.131808	0.195465	1372	0.500216	0.990772	-0.514595	0.26591	1416	0.0531637	0.966161	-0.111862	0.227162	1386	0.622492	0.967971	-0.0885751	0.344052	1388	0.796872	0.991747
BMI	rs17665162	6	50275258	C	T	0.0285	1.7e-15	791156	0.07633	0.089804	0.540558	1405	0.868077	0.983601	0.316086	0.312422	1367	0.311849	0.943145	-0.0769662	0.337785	1372	0.819793	0.990772	0.237441	0.464894	1416	0.609611	0.966161	0.195616	0.398474	1386	0.623567	0.967971	0.471354	0.597373	1388	0.430222	0.991747
BMI	rs4621537	5	74362222	G	A	-0.0201	6.1e-25	529216	0.4331	-0.448058	0.273852	1405	0.102038	0.875461	-0.039197	0.157782	1367	0.803844	0.992591	0.101807	0.171199	1372	0.552163	0.990772	0.0859765	0.235963	1416	0.715641	0.966161	0.098171	0.200858	1386	0.625091	0.967971	0.359462	0.301926	1388	0.23403	0.991747
BMI	rs427943	21	46570896	A	C	-0.017	7.3e-23	712095	0.4564	0.312845	0.289129	1405	0.279428	0.916639	0.0262553	0.166054	1367	0.874391	0.993871	0.381057	0.181402	1372	0.035858	0.92974	0.136192	0.248069	1416	0.583086	0.966161	-0.103016	0.21089	1386	0.625288	0.967971	-0.333218	0.319801	1388	0.297616	0.991747
BMI	rs6849518	4	20120274	T	C	0.0173	2.6e-11	687979	0.1262	-0.0298089	0.390778	1405	0.939207	0.987505	-0.232094	0.224961	1367	0.302394	0.943145	0.075163	0.243663	1372	0.757771	0.990772	-0.0097584	0.333249	1416	0.976643	0.985462	0.138835	0.284255	1386	0.625332	0.967971	0.370755	0.426472	1388	0.384806	0.991747
BMI	rs4372836	2	28973883	T	C	0.0142	7.3e-16	794417	0.3117	0.248474	0.289454	1405	0.390807	0.916639	-0.142881	0.166781	1367	0.391763	0.943145	-0.0564812	0.181489	1372	0.755689	0.990772	0.27452	0.248439	1416	0.269357	0.966161	-0.103632	0.212246	1386	0.625439	0.967971	-0.35984	0.319522	1388	0.260285	0.991747
BMI	rs10007906	4	31023610	A	C	0.0133	1.7e-13	686479	0.4805	-0.223172	0.285918	1405	0.435202	0.916639	0.282433	0.164872	1367	0.0869339	0.943145	0.201322	0.179501	1372	0.262248	0.978631	-0.101585	0.246039	1416	0.679757	0.966161	-0.102547	0.210312	1386	0.625916	0.967971	0.107913	0.317227	1388	0.733776	0.991747
BMI	rs7715256	5	153537893	G	T	0.0166	2.2e-24	795302	0.4636	0.30874	0.263569	1405	0.241646	0.916639	-0.0017141	0.151303	1367	0.990963	0.997005	0.186144	0.164768	1372	0.258787	0.978631	0.126042	0.226807	1416	0.578488	0.966161	0.0933836	0.192364	1386	0.627433	0.967971	-0.0802137	0.290831	1388	0.782736	0.991747
BMI	rs897356	11	11762321	C	G	0.0109	4.3e-10	687474	0.3756	-0.154244	0.281442	1405	0.583745	0.94719	-0.135524	0.162641	1367	0.404837	0.943145	-0.147015	0.176913	1372	0.406118	0.984915	0.511525	0.240884	1416	0.0338834	0.966161	-0.0995191	0.205862	1386	0.62887	0.967971	-0.119453	0.31071	1388	0.700703	0.991747
BMI	rs987237	6	50803050	G	A	0.0409	9.3e-84	795612	0.2024	-0.0933265	0.326268	1405	0.774888	0.973405	-0.0758745	0.187324	1367	0.685509	0.972051	0.00226573	0.204268	1372	0.991152	0.998974	-0.566182	0.280122	1416	0.0434487	0.966161	0.11495	0.2383	1386	0.629616	0.967971	0.0104448	0.360716	1388	0.976904	0.991747
BMI	rs4757638	11	18312953	G	A	-0.0101	2.1e-08	683983	0.4237	-0.16798	0.252071	1405	0.505265	0.916639	-0.0233148	0.144815	1367	0.87212	0.993871	0.0353181	0.15768	1372	0.822802	0.990772	-0.0524718	0.216617	1416	0.808635	0.96912	0.0888038	0.184348	1386	0.630083	0.967971	-0.0174311	0.278316	1388	0.95007	0.991747
BMI	rs4936671	11	121942512	C	G	0.0105	6.2e-09	678888	0.3864	-0.323522	0.293193	1405	0.270024	0.916639	0.137109	0.168615	1367	0.416275	0.943145	0.00498744	0.183507	1372	0.978321	0.997535	-0.301765	0.251706	1416	0.230777	0.966161	-0.103241	0.214471	1386	0.630326	0.967971	0.0386944	0.323338	1388	0.904761	0.991747
BMI	rs13290794	9	37183628	A	G	-0.0141	1.9e-15	688742	0.3124	-0.502625	0.287082	1405	0.0801997	0.875461	-0.233661	0.165137	1367	0.157312	0.943145	0.01745	0.180615	1372	0.923047	0.996224	-0.288922	0.246568	1416	0.241487	0.966161	-0.100657	0.209663	1386	0.631239	0.967971	-0.346332	0.318099	1388	0.276454	0.991747
BMI	rs2289379	7	44804225	T	C	-0.0135	4.3e-14	681639	0.3534	-0.278332	0.301528	1405	0.356131	0.916639	-0.359591	0.173268	1367	0.0381437	0.921635	-0.248328	0.188986	1372	0.189067	0.978631	-0.414573	0.258575	1416	0.109093	0.966161	0.259668	0.220296	1386	0.238712	0.96437	0.489391	0.332836	1388	0.141692	0.991747
BMI	rs7134628	12	53785861	A	G	0.0172	1.2e-09	691228	0.07911	0.291316	0.493334	1405	0.554948	0.935331	-0.150981	0.282277	1367	0.592829	0.952555	0.628831	0.310943	1372	0.0433376	0.92974	0.163498	0.425023	1416	0.700532	0.966161	-0.424385	0.360623	1386	0.239474	0.96437	-0.163613	0.550786	1388	0.76647	0.991747
BMI	rs1285245	17	77796889	C	G	-0.0121	1.7e-11	687342	0.4413	0.406978	0.292066	1405	0.163707	0.916639	0.0909329	0.168551	1367	0.589632	0.952555	-0.0541624	0.183683	1372	0.768139	0.990772	0.21805	0.251619	1416	0.386316	0.966161	0.254513	0.214703	1386	0.236056	0.962122	0.637453	0.323456	1388	0.0489521	0.991747
BMI	rs1927790	13	96922191	C	T	0.0148	1.8e-19	794326	0.4201	0.00333989	0.26642	1405	0.99	0.995568	-0.0323757	0.152981	1367	0.832426	0.993871	0.0920874	0.166828	1372	0.581047	0.990772	-0.0213521	0.229206	1416	0.925792	0.984638	0.230466	0.194711	1386	0.236764	0.962122	-0.105234	0.29456	1388	0.720952	0.991747
BMI	rs1014194	5	168192944	C	A	-0.0102	1.8e-08	686107	0.3743	-0.0844485	0.275056	1405	0.758871	0.973405	-0.0158471	0.157635	1367	0.919938	0.993871	0.107616	0.172311	1372	0.532374	0.990772	-0.0604193	0.236047	1416	0.798017	0.968016	0.255889	0.200016	1386	0.200991	0.960448	0.196751	0.30383	1388	0.517373	0.991747
BMI	rs159032	5	94206202	T	C	0.0129	1.9e-10	682583	0.197	-0.298127	0.342513	1405	0.384227	0.916639	0.148958	0.196398	1367	0.448315	0.943145	0.179571	0.213978	1372	0.401503	0.984915	-0.171053	0.293825	1416	0.560552	0.966161	-0.318115	0.249494	1386	0.202511	0.960448	-0.4689	0.37661	1388	0.213324	0.991747
BMI	rs4963120	11	825777	C	T	-0.013	3.6e-13	669736	0.4859	0.0566409	0.268635	1405	0.833037	0.979776	0.153581	0.154473	1367	0.320293	0.943145	0.166622	0.167834	1372	0.320994	0.978631	0.0265368	0.230757	1416	0.908462	0.984638	-0.249977	0.196473	1386	0.203475	0.960448	0.276635	0.295901	1388	0.350008	0.991747
BMI	rs930295	2	50233352	A	C	0.0211	1e-19	690522	0.129	-0.578614	0.3928	1405	0.140963	0.916639	-0.0422072	0.22458	1367	0.850953	0.993871	0.0625531	0.246492	1372	0.799709	0.990772	-0.308052	0.337191	1416	0.361094	0.966161	0.35864	0.28544	1386	0.209168	0.960448	0.472366	0.4339	1388	0.276499	0.991747
BMI	rs1634350	9	81334684	A	C	0.012	7.6e-12	681977	0.4158	0.203693	0.295334	1405	0.490496	0.916639	0.194114	0.169833	1367	0.253254	0.943145	0.0413473	0.184884	1372	0.823072	0.990772	0.16824	0.253075	1416	0.506298	0.966161	-0.269787	0.215655	1386	0.211143	0.960448	-0.308558	0.325251	1388	0.342953	0.991747
BMI	rs2600226	3	12928762	C	T	0.0116	3.7e-10	685285	0.3607	-0.0651798	0.279232	1405	0.815466	0.975217	0.188531	0.160487	1367	0.240305	0.943145	-0.174765	0.175555	1372	0.319669	0.978631	0.292053	0.240004	1416	0.22386	0.966161	0.255054	0.204137	1386	0.211722	0.960448	0.193547	0.30968	1388	0.532081	0.991747
BMI	rs4820408	22	40604945	T	G	0.0151	2.1e-19	794185	0.3571	-0.226049	0.281803	1405	0.422601	0.916639	-0.288717	0.16247	1367	0.0757851	0.943145	-0.19873	0.176274	1372	0.259776	0.978631	-0.498177	0.242322	1416	0.039982	0.966161	-0.257718	0.207254	1386	0.2139	0.960448	-0.0862451	0.311413	1388	0.781862	0.991747
BMI	rs13174863	5	139080745	G	A	0.0192	2.9e-16	773762	0.1205	-0.0849647	0.432278	1405	0.844208	0.981618	-0.381845	0.248109	1367	0.124033	0.943145	-0.189389	0.26984	1372	0.48289	0.990772	0.157448	0.371204	1416	0.671518	0.966161	0.391908	0.315397	1386	0.214232	0.960448	0.75123	0.474609	1388	0.113688	0.991747
BMI	rs1277723	10	18554623	G	A	-0.0113	1e-08	784894	0.2202	0.181167	0.312863	1405	0.562641	0.936688	0.0654565	0.180878	1367	0.717496	0.977807	0.119032	0.195611	1372	0.542948	0.990772	0.527899	0.266897	1416	0.0481336	0.966161	-0.28315	0.228188	1386	0.214868	0.960448	0.0405567	0.343403	1388	0.906004	0.991747
BMI	rs17391694	1	78623626	T	C	0.0317	7.5e-38	767720	0.08287	0.916862	0.470486	1405	0.0515254	0.875461	-0.306532	0.272621	1367	0.261048	0.943145	-0.193541	0.294163	1372	0.510691	0.990772	0.583149	0.405005	1416	0.150131	0.966161	-0.42992	0.346597	1386	0.215037	0.960448	-0.946113	0.518202	1388	0.0681028	0.991747
BMI	rs7334078	13	99120484	C	T	-0.0121	2.2e-10	688374	0.2772	-0.430147	0.306625	1405	0.160887	0.916639	0.434141	0.176246	1367	0.0138915	0.730181	0.401375	0.191989	1372	0.0367487	0.92974	-0.307114	0.263315	1416	0.243675	0.966161	-0.277662	0.224395	1386	0.216157	0.960448	-0.515034	0.338579	1388	0.128448	0.991747
BMI	rs7102454	11	65594820	C	T	0.0158	2.4e-18	691134	0.3125	0.178612	0.281737	1405	0.526208	0.923132	-0.0461472	0.162468	1367	0.776424	0.987373	0.352656	0.175346	1372	0.0445017	0.92974	-0.163809	0.241776	1416	0.498184	0.966161	0.253726	0.205845	1386	0.217933	0.960448	-0.375735	0.309238	1388	0.224561	0.991747
BMI	rs7973955	12	118409640	A	G	-0.0126	3.7e-11	684108	0.2174	0.28721	0.324218	1405	0.375848	0.916639	-0.0006508	0.187342	1367	0.997229	0.998345	0.0780036	0.20305	1372	0.700921	0.990772	-0.184374	0.277407	1416	0.506393	0.966161	0.290472	0.235912	1386	0.218432	0.960448	0.200109	0.356231	1388	0.574385	0.991747
BMI	rs16932761	8	67202787	A	G	-0.014	1.7e-12	685108	0.2565	-0.496255	0.292439	1405	0.0899294	0.875461	0.123474	0.168746	1367	0.464468	0.943145	0.196307	0.183654	1372	0.285307	0.978631	-0.457821	0.250592	1416	0.0679182	0.966161	-0.262139	0.213343	1386	0.219388	0.960448	-0.162048	0.323324	1388	0.616316	0.991747
BMI	rs7569010	2	206084518	C	G	0.0106	9e-10	691278	0.4356	-0.0779638	0.260681	1405	0.764926	0.973405	-0.168726	0.149823	1367	0.260297	0.943145	-0.118293	0.163598	1372	0.469761	0.990772	0.198387	0.223888	1416	0.375715	0.966161	0.233532	0.190452	1386	0.220334	0.960448	0.301266	0.288267	1388	0.296163	0.991747
BMI	rs7844647	8	34503776	C	T	-0.0123	2.8e-11	793703	0.3488	0.376165	0.287965	1405	0.191671	0.916639	-0.250567	0.166657	1367	0.132947	0.943145	-0.232868	0.180208	1372	0.196502	0.978631	0.00170775	0.247248	1416	0.99449	0.995604	0.259053	0.211431	1386	0.220697	0.960448	0.246041	0.317411	1388	0.438385	0.991747
BMI	rs2512885	11	131467794	C	T	0.0128	9.9e-15	785785	0.4696	0.174158	0.265089	1405	0.511303	0.916639	0.103369	0.152263	1367	0.497327	0.943145	-0.15876	0.166692	1372	0.341057	0.978631	0.100763	0.227672	1416	0.658137	0.966161	-0.236884	0.193479	1386	0.221034	0.960448	0.218314	0.293854	1388	0.457648	0.991747
BMI	rs4704513	5	77787889	G	C	0.0125	7.4e-09	686651	0.2045	-0.172582	0.365807	1405	0.637155	0.957887	-0.164446	0.210817	1367	0.435501	0.943145	-0.17337	0.228938	1372	0.449013	0.990772	-0.255287	0.314802	1416	0.417536	0.966161	-0.326721	0.268614	1386	0.224072	0.960448	-0.80604	0.403813	1388	0.0461229	0.991747
BMI	rs13072095	3	193639623	C	T	-0.0095	3e-08	795578	0.3441	0.109739	0.266036	1405	0.68004	0.966543	0.230608	0.153311	1367	0.132768	0.943145	-0.0352155	0.16608	1372	0.832109	0.990772	0.0976628	0.228896	1416	0.669686	0.966161	-0.236636	0.194764	1386	0.224579	0.960448	-0.0266762	0.293705	1388	0.927644	0.991747
BMI	rs8071182	17	55336155	A	G	0.0133	2.1e-09	771437	0.1724	0.549299	0.359856	1405	0.127127	0.88977	-0.0621975	0.207819	1367	0.764767	0.982546	-0.0552247	0.22592	1372	0.806924	0.990772	0.329902	0.309887	1416	0.287245	0.966161	0.320401	0.264545	1386	0.226049	0.960448	0.138546	0.398925	1388	0.728421	0.991747
BMI	rs1776209	10	93810872	G	A	-0.0107	2.2e-08	683705	0.2682	-0.267667	0.305363	1405	0.380881	0.916639	-0.133186	0.175788	1367	0.448792	0.943145	0.0823931	0.191174	1372	0.666548	0.990772	-0.50265	0.261652	1416	0.0549258	0.966161	0.268744	0.223328	1386	0.229043	0.960448	0.585591	0.335641	1388	0.0812612	0.991747
BMI	rs7933205	11	97831073	A	G	-0.0116	3.2e-08	692432	0.2602	-0.470434	0.299363	1405	0.116306	0.87976	-0.115762	0.17308	1367	0.503715	0.943145	-0.322187	0.187438	1372	0.0858604	0.978631	-0.0057465	0.257674	1416	0.982211	0.989962	0.26471	0.220062	1386	0.229227	0.960448	-0.139247	0.331132	1388	0.674173	0.991747
BMI	rs8081039	17	75995829	T	C	0.0233	6.1e-10	677239	0.0443	-0.47428	0.70205	1405	0.499429	0.916639	0.0809729	0.399849	1367	0.839549	0.993871	0.258746	0.441505	1372	0.557937	0.990772	-1.04736	0.604557	1416	0.0834155	0.966161	-0.613536	0.511004	1386	0.230095	0.960448	0.360167	0.78257	1388	0.64542	0.991747
BMI	rs2190788	5	144484261	T	G	0.0141	2.9e-14	683650	0.2648	0.373313	0.305687	1405	0.222208	0.916639	0.247719	0.175294	1367	0.157837	0.943145	0.472931	0.191378	1372	0.0135885	0.92974	0.177515	0.262487	1416	0.498973	0.966161	-0.267357	0.222766	1386	0.23028	0.960448	-0.293251	0.33799	1388	0.385748	0.991747
BMI	rs535533	2	166959505	C	T	0.0104	3.4e-09	690482	0.4492	0.319773	0.256555	1405	0.212823	0.916639	-0.102434	0.148213	1367	0.489604	0.943145	-0.281973	0.160563	1372	0.0792884	0.978631	0.273109	0.220051	1416	0.21477	0.966161	0.225093	0.188187	1386	0.23186	0.960448	-0.0776229	0.283249	1388	0.784092	0.991747
BMI	rs1865341	9	8845911	C	T	-0.0128	2.5e-10	688863	0.2055	0.0808529	0.325091	1405	0.803623	0.973742	-0.490524	0.186572	1367	0.00865728	0.644967	-0.217443	0.203919	1372	0.286471	0.978631	-0.199792	0.279345	1416	0.474593	0.966161	0.282985	0.237152	1386	0.232973	0.960448	0.167403	0.358935	1388	0.641012	0.991747
BMI	rs7239114	18	45921214	G	A	-0.0124	1.2e-13	769496	0.4608	0.141595	0.260569	1405	0.586937	0.94719	-0.030659	0.1497	1367	0.837757	0.993871	-0.225531	0.163457	1372	0.167888	0.978631	0.0542131	0.223523	1416	0.808398	0.96912	-0.226034	0.189601	1386	0.233405	0.960448	-0.0420416	0.287877	1388	0.883911	0.991747
BMI	rs9318686	13	81012613	C	T	0.0105	1e-08	690542	0.3406	-0.142735	0.266152	1405	0.591843	0.94719	-0.0600231	0.153116	1367	0.695113	0.97304	0.0840901	0.166251	1372	0.613078	0.990772	-0.0170445	0.228933	1416	0.940661	0.984638	0.232289	0.194986	1386	0.233736	0.960448	-0.0200083	0.293857	1388	0.945725	0.991747
BMI	rs10745785	12	97586257	C	T	0.0111	1.2e-09	691086	0.3016	0.232388	0.295372	1405	0.431553	0.916639	0.0933614	0.169685	1367	0.582271	0.952555	-0.0034271	0.18478	1372	0.985205	0.997535	0.233557	0.254077	1416	0.358131	0.966161	0.257588	0.216244	1386	0.233784	0.960448	0.0555502	0.32616	1388	0.864787	0.991747
BMI	rs12899905	15	47142090	T	C	-0.0106	8.2e-09	779361	0.2323	0.261075	0.321852	1405	0.417409	0.916639	-0.0210085	0.185849	1367	0.910015	0.993871	0.0225482	0.201015	1372	0.910704	0.996224	0.333161	0.277013	1416	0.229299	0.966161	0.28124	0.236164	1386	0.233912	0.960448	0.0343849	0.355613	1388	0.922985	0.991747
BMI	rs11170468	12	39430048	C	A	-0.0123	1.9e-10	795265	0.1961	0.080992	0.325483	1405	0.803524	0.973742	-0.0300121	0.186835	1367	0.872406	0.993871	-0.0146327	0.204763	1372	0.943041	0.996224	-0.111383	0.279689	1416	0.690514	0.966161	0.282768	0.237595	1386	0.234203	0.960448	0.12493	0.361333	1388	0.729585	0.991747
BMI	rs13021737	2	632348	A	G	-0.0574	7.5e-157	789534	0.1566	0.306747	0.348911	1405	0.379469	0.916639	0.192103	0.19996	1367	0.336871	0.943145	0.190087	0.217406	1372	0.382088	0.984915	0.241534	0.300096	1416	0.421039	0.966161	0.361108	0.254805	1386	0.156654	0.957738	0.365357	0.384199	1388	0.341793	0.991747
BMI	rs4911442	20	33355046	G	A	-0.015	5.4e-10	795055	0.08124	-0.314992	0.482978	1405	0.514388	0.916639	0.152086	0.27752	1367	0.58377	0.952555	-0.32112	0.301085	1372	0.286369	0.978631	0.18836	0.415516	1416	0.650391	0.966161	0.497525	0.352855	1386	0.158767	0.957738	0.90311	0.531387	1388	0.0894449	0.991747
BMI	rs8097672	18	1839601	T	A	0.02	8.4e-16	686063	0.1796	0.142038	0.363093	1405	0.695717	0.973405	0.133596	0.20714	1367	0.519067	0.943145	0.266366	0.226172	1372	0.239116	0.978631	-0.0093126	0.311574	1416	0.97616	0.985462	0.371339	0.263401	1386	0.158828	0.957738	0.0609384	0.399113	1388	0.878669	0.991747
BMI	rs1436344	3	104606144	G	C	-0.0141	4.1e-16	692017	0.4492	-0.0706248	0.261853	1405	0.787422	0.973405	-0.152012	0.150671	1367	0.313203	0.943145	-0.204074	0.163946	1372	0.213434	0.978631	0.0880253	0.225042	1416	0.695746	0.966161	0.269524	0.191198	1386	0.158866	0.957738	0.169975	0.289747	1388	0.557547	0.991747
BMI	rs10971721	9	33827694	T	C	-0.0199	5.7e-13	686442	0.07323	1.31091	0.528812	1405	0.013294	0.757624	-0.1119	0.303113	1367	0.71206	0.973578	-0.101477	0.33103	1372	0.759233	0.990772	1.06078	0.454555	1416	0.0197531	0.966161	0.53768	0.385494	1386	0.163307	0.957738	0.0561726	0.584406	1388	0.92344	0.991747
BMI	rs896183	7	127831580	A	G	0.0102	2.3e-09	758144	0.338	-0.486874	0.304707	1405	0.110305	0.875461	-0.0439329	0.175598	1367	0.802479	0.992591	0.269335	0.190566	1372	0.157784	0.978631	-0.333468	0.261687	1416	0.202768	0.966161	-0.309082	0.222786	1386	0.16556	0.957738	0.31412	0.335998	1388	0.350011	0.991747
BMI	rs12299814	12	90216146	A	C	-0.0157	5.2e-15	687962	0.262	0.0310346	0.293106	1405	0.915691	0.98481	-0.130453	0.168759	1367	0.43965	0.943145	0.297742	0.18294	1372	0.103854	0.978631	-0.114298	0.252239	1416	0.650523	0.966161	0.297467	0.214818	1386	0.166358	0.957738	0.198197	0.323827	1388	0.540607	0.991747
BMI	rs1304070	13	65479449	G	A	-0.0126	3.7e-10	691747	0.2395	-0.281852	0.307623	1405	0.359708	0.916639	0.144537	0.176701	1367	0.413515	0.943145	0.329893	0.192173	1372	0.0862713	0.978631	-0.143375	0.264562	1416	0.587951	0.966161	0.311031	0.224958	1386	0.167006	0.957738	0.20004	0.339714	1388	0.55606	0.991747
BMI	rs1454148	3	176341188	T	C	0.0106	4.6e-08	691136	0.273	-0.4234	0.305305	1405	0.165722	0.916639	0.0993496	0.175719	1367	0.571903	0.952555	0.0692441	0.191623	1372	0.71789	0.990772	-0.327302	0.262753	1416	0.213095	0.966161	0.30873	0.223397	1386	0.167203	0.957738	0.202385	0.338635	1388	0.550172	0.991747
BMI	rs13191362	6	163033350	G	A	-0.0236	5.9e-21	792699	0.09873	-0.403637	0.425773	1405	0.343289	0.916639	-0.0808857	0.24457	1367	0.740903	0.982546	-0.218891	0.264746	1372	0.408498	0.984915	-0.571759	0.362953	1416	0.115413	0.966161	0.426357	0.308783	1386	0.167575	0.957738	0.147659	0.464536	1388	0.750637	0.991747
BMI	rs1320903	3	131758077	A	G	0.0216	9.2e-32	691519	0.3161	0.0862221	0.276446	1405	0.755167	0.973405	-0.260804	0.158902	1367	0.100969	0.943145	-0.507032	0.172235	1372	0.00329677	0.737441	0.0533107	0.237755	1416	0.822615	0.96912	-0.279608	0.202757	1386	0.16811	0.957738	0.210894	0.304752	1388	0.489043	0.991747
BMI	rs13168288	5	106385815	G	A	-0.0133	6.4e-11	706550	0.229	-0.269018	0.320941	1405	0.402052	0.916639	0.230177	0.185527	1367	0.214946	0.943145	-0.029293	0.200735	1372	0.883999	0.996224	0.0967384	0.276119	1416	0.726128	0.966161	0.323271	0.236233	1386	0.171397	0.957738	0.267539	0.354316	1388	0.450327	0.991747
BMI	rs16871902	5	3488462	A	G	0.0125	4.6e-13	690830	0.4954	0.112758	0.270555	1405	0.676914	0.965048	-0.120381	0.155283	1367	0.438338	0.943145	-0.0405303	0.169261	1372	0.810789	0.990772	0.187031	0.232624	1416	0.421529	0.966161	-0.267988	0.197329	1386	0.174663	0.957738	-0.24018	0.298537	1388	0.421234	0.991747
BMI	rs17105272	14	77529783	T	C	0.011	3.2e-09	681028	0.3027	-0.540656	0.293001	1405	0.0652154	0.875461	-0.120394	0.168441	1367	0.474886	0.943145	-0.0225972	0.183248	1372	0.901876	0.996224	-0.315785	0.251494	1416	0.209456	0.966161	0.289711	0.213495	1386	0.175006	0.957738	-0.229698	0.322573	1388	0.476537	0.991747
BMI	rs11792311	9	29672405	A	G	-0.0144	1.3e-12	682503	0.2239	-0.166333	0.314412	1405	0.59687	0.948367	-0.236795	0.182627	1367	0.194988	0.943145	-0.402575	0.197731	1372	0.0419467	0.92974	0.300657	0.269823	1416	0.265352	0.966161	-0.313068	0.231394	1386	0.176289	0.957738	-0.365015	0.347867	1388	0.294227	0.991747
BMI	rs4766710	12	114437708	G	A	-0.0229	3.7e-11	691939	0.06669	-0.766742	0.514223	1405	0.13617	0.916639	-0.18501	0.295745	1367	0.531701	0.943145	-0.0586918	0.323179	1372	0.855918	0.990772	-0.442538	0.441033	1416	0.315835	0.966161	-0.506752	0.375219	1386	0.177062	0.957738	-0.356631	0.565672	1388	0.528502	0.991747
BMI	rs2307111	5	75003678	C	T	-0.0265	1.6e-58	795430	0.4681	-0.259626	0.269099	1405	0.334814	0.916639	0.221362	0.154383	1367	0.151846	0.943145	-0.0146648	0.168002	1372	0.930454	0.996224	-0.130871	0.231392	1416	0.571768	0.966161	0.265302	0.19653	1386	0.17726	0.957738	-0.0719481	0.296841	1388	0.808523	0.991747
BMI	rs7780752	7	93241640	C	T	0.0139	1e-14	690830	0.3029	0.590749	0.287665	1405	0.0402011	0.869587	-0.119443	0.166059	1367	0.472091	0.943145	0.00810967	0.180818	1372	0.964234	0.997084	0.287431	0.247571	1416	0.245837	0.966161	-0.28367	0.210988	1386	0.179014	0.957738	-0.313377	0.318976	1388	0.326053	0.991747
BMI	rs10263780	7	19778086	A	G	-0.0157	8.3e-09	544806	0.184	0.0147246	0.352201	1405	0.966658	0.992802	-0.329723	0.203657	1367	0.105678	0.943145	-0.112194	0.221096	1372	0.611924	0.990772	0.158105	0.302008	1416	0.600699	0.966161	-0.347897	0.258855	1386	0.179175	0.957738	0.0733871	0.389634	1388	0.850631	0.991747
BMI	rs13263601	8	14095900	C	A	0.0154	2.2e-17	686196	0.3151	-0.270138	0.287099	1405	0.346907	0.916639	0.0316757	0.164677	1367	0.847496	0.993871	0.0121905	0.179673	1372	0.945916	0.996224	-0.126647	0.246175	1416	0.607013	0.966161	0.279933	0.208823	1386	0.180295	0.957738	0.0191675	0.316073	1388	0.951652	0.991747
BMI	rs977747	1	47684677	T	G	0.0169	1.3e-24	793546	0.4681	0.21353	0.258433	1405	0.408804	0.916639	0.360594	0.148439	1367	0.0152599	0.730181	0.378756	0.161985	1372	0.0195207	0.92974	0.28493	0.221796	1416	0.199128	0.966161	-0.252833	0.188831	1386	0.180813	0.957738	0.0157668	0.285967	1388	0.956039	0.991747
BMI	rs11866815	16	387867	T	C	-0.0156	1e-16	792501	0.2623	-0.396788	0.303063	1405	0.190662	0.916639	-0.0659556	0.174053	1367	0.704793	0.97304	0.152338	0.189505	1372	0.42161	0.990772	-0.285706	0.260454	1416	0.27285	0.966161	0.296513	0.221458	1386	0.180821	0.957738	0.256901	0.334367	1388	0.442428	0.991747
BMI	rs3134353	8	101947453	A	T	-0.0125	2.5e-12	679869	0.3349	-0.301797	0.29739	1405	0.310368	0.916639	0.0152886	0.171832	1367	0.929116	0.997005	-0.145107	0.186054	1372	0.435575	0.990772	0.057628	0.255659	1416	0.821693	0.96912	-0.291618	0.217931	1386	0.181079	0.957738	-0.063849	0.3279	1388	0.84564	0.991747
BMI	rs2033529	6	40348653	G	A	0.0205	1.9e-30	792112	0.2491	-0.319727	0.307206	1405	0.298169	0.916639	0.298207	0.176515	1367	0.0913707	0.943145	0.435613	0.192487	1372	0.0237883	0.92974	0.0183426	0.264382	1416	0.944698	0.984638	-0.300415	0.224805	1386	0.181661	0.957738	0.148509	0.340515	1388	0.662809	0.991747
BMI	rs653264	11	68699775	A	G	-0.0099	9.3e-09	686404	0.4938	0.196253	0.263182	1405	0.455979	0.916639	-0.101568	0.151539	1367	0.502818	0.943145	-0.025594	0.164966	1372	0.876728	0.993592	-0.013371	0.225867	1416	0.952803	0.984638	0.255507	0.192322	1386	0.184222	0.957738	0.139683	0.290669	1388	0.630909	0.991747
BMI	rs2357760	6	120213880	G	A	-0.0145	6.8e-17	791053	0.3124	0.440921	0.269396	1405	0.101918	0.875461	-0.157544	0.1548	1367	0.308989	0.943145	-0.142992	0.169152	1372	0.398064	0.984915	0.184694	0.232175	1416	0.426459	0.966161	0.261415	0.197281	1386	0.185362	0.957738	0.117009	0.299161	1388	0.695765	0.991747
BMI	rs10431745	14	102302372	G	A	-0.0203	1.1e-09	690529	0.09497	-0.743014	0.432149	1405	0.0857732	0.875461	-0.205753	0.248419	1367	0.407676	0.943145	0.321939	0.269941	1372	0.233224	0.978631	-0.446576	0.371881	1416	0.230009	0.966161	-0.419277	0.31646	1386	0.185425	0.957738	0.147569	0.477548	1388	0.757358	0.991747
BMI	rs1158684	4	173584086	A	G	0.0099	9.1e-09	688147	0.4441	-0.483948	0.267171	1405	0.0702978	0.875461	-0.156365	0.154059	1367	0.310303	0.943145	-0.0551052	0.167556	1372	0.742299	0.990772	-0.287827	0.230036	1416	0.211059	0.966161	-0.258942	0.195954	1386	0.186574	0.957738	-0.24279	0.296068	1388	0.41233	0.991747
BMI	rs823074	1	205774839	C	T	-0.0112	1.6e-10	689143	0.3137	0.347899	0.280043	1405	0.214333	0.916639	-0.0502223	0.16079	1367	0.754824	0.982546	0.124202	0.17557	1372	0.479427	0.990772	0.210536	0.240825	1416	0.382144	0.966161	-0.270164	0.20481	1386	0.187357	0.957738	-0.202942	0.30944	1388	0.512039	0.991747
BMI	rs1336486	13	40784814	G	T	0.0141	1.8e-14	688180	0.3261	-0.133527	0.276135	1405	0.628775	0.955363	-0.0809997	0.158794	1367	0.610069	0.952555	0.00077283	0.17218	1372	0.996419	0.999826	-0.213379	0.237502	1416	0.369109	0.966161	-0.265512	0.202089	1386	0.18912	0.957738	-0.0545481	0.304417	1388	0.857816	0.991747
BMI	rs7498665	16	28883241	G	A	0.0271	5.6e-60	790299	0.3763	-0.0389962	0.263993	1405	0.882588	0.98481	-0.292598	0.151266	1367	0.053282	0.943145	0.106737	0.165787	1372	0.519802	0.990772	0.128337	0.226997	1416	0.571913	0.966161	-0.252722	0.192563	1386	0.189601	0.957738	-0.138493	0.292249	1388	0.635656	0.991747
BMI	rs1784460	11	118938371	A	T	0.0132	9e-14	680042	0.4119	-0.115342	0.263248	1405	0.661345	0.965048	-0.329351	0.150851	1367	0.0291864	0.867534	-0.321819	0.164021	1372	0.049959	0.92974	-0.0494619	0.226398	1416	0.827092	0.96912	0.251256	0.19233	1386	0.191642	0.957738	0.375749	0.289853	1388	0.195074	0.991747
BMI	rs1524277	7	109173130	T	C	-0.0106	2.2e-09	633568	0.4796	0.115716	0.268542	1405	0.666603	0.965048	0.176044	0.155127	1367	0.256647	0.943145	-0.150129	0.168457	1372	0.37298	0.984915	0.227518	0.230299	1416	0.32336	0.966161	-0.255777	0.196885	1386	0.19412	0.957738	0.125237	0.297039	1388	0.67337	0.991747
BMI	rs2235564	1	6713114	T	C	0.0131	3.7e-13	691544	0.3581	0.187994	0.27761	1405	0.498399	0.916639	0.152988	0.160267	1367	0.339962	0.943145	0.0392155	0.173863	1372	0.821582	0.990772	-0.309359	0.238529	1416	0.194863	0.966161	-0.263693	0.203077	1386	0.194338	0.957738	-0.128321	0.306812	1388	0.675837	0.991747
BMI	rs1462496	2	157607055	A	T	0.0105	9.3e-09	629880	0.3965	0.440305	0.278099	1405	0.113588	0.87976	0.227043	0.160356	1367	0.157045	0.943145	-0.0414772	0.173972	1372	0.811597	0.990772	0.354487	0.238167	1416	0.13687	0.966161	0.263128	0.203101	1386	0.195348	0.957738	0.513718	0.305424	1388	0.0927995	0.991747
BMI	rs11792069	9	140646121	G	A	-0.0145	6.5e-10	644252	0.1373	-0.19815	0.376285	1405	0.598558	0.948367	-0.23205	0.215649	1367	0.282096	0.943145	0.107409	0.236275	1372	0.649475	0.990772	-0.535742	0.32252	1416	0.0969143	0.966161	-0.354081	0.274011	1386	0.196501	0.957738	-0.524446	0.414253	1388	0.205726	0.991747
BMI	rs9787495	10	103206115	A	G	-0.0103	3.1e-09	689779	0.3627	-0.32478	0.274348	1405	0.236685	0.916639	0.337321	0.157945	1367	0.0328845	0.879509	0.0127647	0.172248	1372	0.940937	0.996224	0.0982179	0.235489	1416	0.676683	0.966161	0.259069	0.200514	1386	0.196565	0.957738	-0.116157	0.302953	1388	0.70147	0.991747
BMI	rs1891215	1	7727854	C	T	0.0117	1.3e-11	684485	0.4511	0.480297	0.276481	1405	0.0825766	0.875461	-0.0294367	0.159537	1367	0.853638	0.993871	0.061932	0.173414	1372	0.721047	0.990772	0.271653	0.23761	1416	0.253118	0.966161	-0.260944	0.202391	1386	0.197509	0.957738	-0.11084	0.30511	1388	0.716453	0.991747
BMI	rs9507983	13	28620036	C	T	0.0156	1.4e-18	692568	0.3872	-0.521064	0.261115	1405	0.046179	0.869587	0.142522	0.150106	1367	0.342551	0.943145	0.0653148	0.164266	1372	0.690976	0.990772	-0.326161	0.22445	1416	0.146404	0.966161	-0.245678	0.191039	1386	0.198655	0.957738	-0.462404	0.288884	1388	0.109683	0.991747
BMI	rs6690764	1	92976590	G	A	0.0154	6.3e-12	733760	0.1741	-0.349131	0.340235	1405	0.305001	0.916639	-0.162664	0.195319	1367	0.405098	0.943145	-0.27599	0.212514	1372	0.194271	0.978631	-0.266722	0.29143	1416	0.360233	0.966161	0.318451	0.247661	1386	0.198717	0.957738	0.489369	0.373712	1388	0.190589	0.991747
BMI	rs1431659	8	73439070	A	G	0.0196	6e-24	689739	0.2581	0.0233088	0.298534	1405	0.937778	0.987505	0.0122586	0.171762	1367	0.943114	0.997005	-0.103269	0.186065	1372	0.578978	0.990772	0.131063	0.256807	1416	0.609882	0.966161	-0.280867	0.218696	1386	0.199261	0.957738	0.20578	0.328842	1388	0.531568	0.991747
BMI	rs2053865	2	162715135	C	T	-0.01	7.6e-09	687357	0.4511	0.215933	0.271011	1405	0.425721	0.916639	0.0337513	0.155564	1367	0.828271	0.993871	-0.194409	0.169776	1372	0.252372	0.978631	0.0853988	0.232517	1416	0.713466	0.966161	-0.293748	0.197452	1386	0.137061	0.957183	-0.285529	0.298972	1388	0.339726	0.991747
BMI	rs2281819	6	33771673	A	T	-0.016	5.1e-15	687785	0.2431	0.484329	0.310233	1405	0.118709	0.87976	-0.240422	0.178088	1367	0.177236	0.943145	-0.048904	0.193628	1372	0.800641	0.990772	0.220522	0.266579	1416	0.408248	0.966161	0.335001	0.226529	1386	0.139411	0.957183	0.275541	0.341117	1388	0.419368	0.991747
BMI	rs577525	10	99769388	C	T	0.0166	9.7e-22	690616	0.4971	-0.0606266	0.29022	1405	0.834558	0.979776	-0.243505	0.166108	1367	0.142895	0.943145	-0.1782	0.181662	1372	0.326796	0.978631	0.0938337	0.249113	1416	0.706475	0.966161	-0.312063	0.211526	1386	0.140364	0.957183	-0.409228	0.319408	1388	0.200336	0.991747
BMI	rs340025	15	60908307	T	C	-0.0124	1e-13	786830	0.3941	0.0600438	0.265942	1405	0.821407	0.975217	-0.176571	0.15269	1367	0.247721	0.943145	-0.286889	0.166571	1372	0.0852378	0.978631	-0.0245576	0.228961	1416	0.914601	0.984638	-0.286039	0.194474	1386	0.141565	0.957183	-0.134676	0.294697	1388	0.647744	0.991747
BMI	rs17608150	12	110046698	T	C	0.0196	1.3e-10	791472	0.06048	-0.478949	0.525003	1405	0.361779	0.916639	-0.0400711	0.303791	1367	0.89508	0.993871	0.229025	0.327982	1372	0.485119	0.990772	-0.236316	0.45179	1416	0.601011	0.966161	-0.568203	0.386391	1386	0.141645	0.957183	-0.217916	0.579139	1388	0.70677	0.991747
BMI	rs9816226	3	185834499	A	T	-0.0323	1.6e-52	778333	0.1759	0.112137	0.338913	1405	0.740791	0.973405	0.122178	0.195301	1367	0.531689	0.943145	0.14251	0.211963	1372	0.501484	0.990772	0.229843	0.290276	1416	0.428606	0.966161	-0.362964	0.2477	1386	0.143059	0.957183	0.0401815	0.371885	1388	0.913973	0.991747
BMI	rs1990573	16	9713688	A	G	-0.013	2.4e-13	788031	0.3182	-0.166292	0.285625	1405	0.560522	0.936649	-0.113323	0.164985	1367	0.492283	0.943145	-0.0887132	0.179318	1372	0.620874	0.990772	-0.45488	0.245426	1416	0.0640297	0.966161	-0.306681	0.209607	1386	0.143664	0.957183	-0.586002	0.316189	1388	0.0640494	0.991747
BMI	rs7195386	16	24578458	T	C	0.0133	1.1e-14	687736	0.4248	-0.277054	0.267731	1405	0.300932	0.916639	-0.217227	0.153956	1367	0.158484	0.943145	-0.182108	0.167767	1372	0.2779	0.978631	-0.291027	0.230166	1416	0.206289	0.966161	0.285947	0.195872	1386	0.144556	0.957183	0.416827	0.296174	1388	0.159542	0.991747
BMI	rs7869771	9	94180627	C	A	-0.014	4.9e-13	679436	0.3619	-0.0347741	0.293357	1405	0.905658	0.98481	0.175853	0.169401	1367	0.299416	0.943145	0.0749787	0.182949	1372	0.681993	0.990772	-0.0870916	0.252077	1416	0.729773	0.966161	-0.312527	0.21524	1386	0.146731	0.957183	0.0755632	0.323037	1388	0.815086	0.991747
BMI	rs2717926	7	37714304	C	T	-0.0097	2.6e-08	794691	0.3017	0.203404	0.30197	1405	0.500684	0.916639	-0.22651	0.174018	1367	0.19326	0.943145	0.00104245	0.189843	1372	0.99562	0.999826	-0.017128	0.258892	1416	0.947261	0.984638	0.319927	0.220537	1386	0.1471	0.957183	-0.23573	0.333775	1388	0.480149	0.991747
BMI	rs2172211	3	70024751	G	A	0.0101	3.5e-08	794768	0.288	-0.203689	0.304248	1405	0.503298	0.916639	0.0457475	0.17528	1367	0.794135	0.992591	-0.0571951	0.191081	1372	0.764739	0.990772	-0.199277	0.261461	1416	0.446089	0.966161	0.323043	0.222753	1386	0.147222	0.957183	-0.229519	0.336667	1388	0.495519	0.991747
BMI	rs12953970	18	13186928	A	G	0.0125	3.9e-08	686597	0.1744	0.5821	0.340324	1405	0.0874094	0.875461	0.0662769	0.19644	1367	0.735876	0.982546	0.0609276	0.212393	1372	0.774261	0.990772	0.452692	0.292819	1416	0.122335	0.966161	-0.362552	0.250041	1386	0.147295	0.957183	-0.342283	0.375144	1388	0.361715	0.991747
BMI	rs13292976	9	129467340	T	C	0.0131	3.1e-14	692152	0.4464	-0.158249	0.261634	1405	0.545377	0.934853	0.0638093	0.1503	1367	0.671235	0.970823	0.173939	0.163774	1372	0.288394	0.978631	-0.179225	0.22489	1416	0.425618	0.966161	-0.276181	0.191235	1386	0.148913	0.957183	-0.554061	0.288341	1388	0.0548694	0.991747
BMI	rs1852006	7	77829768	A	G	-0.0156	4.9e-18	692290	0.3616	-0.0672165	0.27476	1405	0.806774	0.97467	0.00354865	0.157846	1367	0.982067	0.997005	-0.466926	0.17229	1372	0.00681082	0.92974	0.142216	0.23604	1416	0.546932	0.966161	-0.288736	0.200376	1386	0.149821	0.957183	-0.223319	0.304347	1388	0.463217	0.991747
BMI	rs7802342	7	137435925	G	T	0.0121	3.1e-10	683565	0.2854	0.35976	0.288347	1405	0.212365	0.916639	-0.0923145	0.166033	1367	0.578301	0.952555	-0.338902	0.180781	1372	0.0610548	0.978631	0.488797	0.247493	1416	0.0484642	0.966161	0.304163	0.211139	1386	0.149931	0.957183	0.610294	0.31872	1388	0.0557218	0.991747
BMI	rs4912637	5	141720261	A	G	-0.0103	1.5e-08	691647	0.3437	0.0185635	0.275021	1405	0.946194	0.989927	-0.0989712	0.158075	1367	0.531353	0.943145	-0.0623641	0.171822	1372	0.716693	0.990772	-0.149405	0.236667	1416	0.527954	0.966161	0.287588	0.201162	1386	0.153049	0.957183	0.456602	0.303528	1388	0.13273	0.991747
BMI	rs11629783	15	66741387	G	C	-0.0146	9.8e-13	690824	0.1965	0.770028	0.330964	1405	0.0201281	0.757624	0.131126	0.190248	1367	0.490791	0.943145	0.0397813	0.207296	1372	0.847845	0.990772	0.250866	0.283966	1416	0.377151	0.966161	-0.344334	0.240979	1386	0.153261	0.957183	-0.482853	0.363817	1388	0.184667	0.991747
BMI	rs2065418	11	30422068	G	T	-0.0166	3.6e-20	691707	0.3305	-0.239265	0.272389	1405	0.379881	0.916639	-0.182736	0.156071	1367	0.241866	0.943145	-0.0200274	0.17012	1372	0.906303	0.996224	0.0168543	0.234156	1416	0.942629	0.984638	-0.283176	0.198307	1386	0.153529	0.957183	-0.0780093	0.300284	1388	0.795069	0.991747
BMI	rs9367368	6	13189275	C	T	-0.0121	1e-11	786723	0.2342	0.0500704	0.321612	1405	0.876303	0.98481	-0.159112	0.184491	1367	0.388598	0.943145	0.079449	0.202198	1372	0.694436	0.990772	-0.103602	0.275972	1416	0.707413	0.966161	0.333938	0.234225	1386	0.154177	0.957183	0.523211	0.356006	1388	0.141881	0.991747
BMI	rs1021066	8	106368050	G	T	0.0096	2.5e-08	690198	0.4717	-0.236582	0.271682	1405	0.38401	0.916639	0.0252953	0.156205	1367	0.87138	0.993871	0.0821826	0.169996	1372	0.628862	0.990772	-0.218422	0.233527	1416	0.349785	0.966161	0.297959	0.198542	1386	0.133654	0.955895	0.207906	0.299838	1388	0.48818	0.991747
BMI	rs1345942	2	57335044	C	T	0.0104	5.2e-09	689852	0.3575	0.0671576	0.271853	1405	0.804916	0.973742	-0.15605	0.156072	1367	0.317556	0.943145	-0.224648	0.169885	1372	0.186274	0.978631	-0.145756	0.233274	1416	0.532187	0.966161	0.299615	0.19814	1386	0.130729	0.945901	0.342099	0.299185	1388	0.253058	0.991747
BMI	rs2009416	5	92415111	T	C	-0.0121	1.1e-11	691741	0.4457	-0.0079857	0.272825	1405	0.976653	0.994282	-0.0570348	0.156435	1367	0.715473	0.976539	0.0877357	0.170403	1372	0.606727	0.990772	0.134578	0.234266	1416	0.565746	0.966161	0.299934	0.198593	1386	0.131199	0.945901	0.443669	0.300304	1388	0.139797	0.991747
BMI	rs4516268	17	1846831	A	C	-0.0217	5.2e-25	786617	0.1798	-0.147584	0.336062	1405	0.660615	0.965048	0.132656	0.19273	1367	0.491381	0.943145	0.370272	0.209119	1372	0.0768467	0.978631	-0.172966	0.289278	1416	0.549988	0.966161	-0.373763	0.245441	1386	0.128032	0.945127	-0.224208	0.37043	1388	0.545102	0.991747
BMI	rs3849570	3	81792112	A	C	0.0132	3.3e-14	750266	0.3616	-0.155192	0.272183	1405	0.56865	0.941432	-0.0203247	0.155774	1367	0.89621	0.993871	0.196537	0.170576	1372	0.249443	0.978631	-0.213931	0.234258	1416	0.361279	0.966161	-0.301417	0.198423	1386	0.128977	0.945127	0.0760149	0.301633	1388	0.80107	0.991747
BMI	rs4740383	9	133783566	A	G	0.0126	1.9e-12	662683	0.4958	0.640445	0.266987	1405	0.0165802	0.757624	0.0391	0.154532	1367	0.800289	0.992591	-0.200108	0.167675	1372	0.23291	0.978631	0.199179	0.229875	1416	0.386382	0.966161	-0.299028	0.195424	1386	0.126211	0.944152	-0.14712	0.295093	1388	0.618172	0.991747
BMI	rs1584121	12	23559163	A	G	-0.0126	6e-09	692007	0.2187	-0.283693	0.318532	1405	0.373284	0.916639	-0.256199	0.182621	1367	0.160875	0.943145	-0.188304	0.199664	1372	0.345796	0.978631	-0.376972	0.273316	1416	0.168037	0.966161	-0.354776	0.232177	1386	0.126732	0.944152	-0.576334	0.351254	1388	0.101069	0.991747
BMI	rs1117080	20	43428323	G	C	-0.011	7e-09	690702	0.2703	0.190423	0.3152	1405	0.545854	0.934853	0.366884	0.181387	1367	0.0433049	0.931534	-0.105869	0.196581	1372	0.590285	0.990772	-0.0639915	0.270913	1416	0.813306	0.96912	0.354704	0.230442	1386	0.123978	0.93929	0.475925	0.346539	1388	0.169862	0.991747
BMI	rs7083450	10	103984060	C	T	-0.0159	1.7e-12	795609	0.1306	-0.285807	0.387858	1405	0.461317	0.916639	-0.102046	0.22371	1367	0.648352	0.965121	0.0186851	0.242693	1372	0.938642	0.996224	-0.268913	0.33332	1416	0.419934	0.966161	0.488751	0.283614	1386	0.0850603	0.920514	0.188175	0.427878	1388	0.660161	0.991747
BMI	rs17819597	5	50344550	C	G	0.0161	1.4e-10	688244	0.1128	0.26544	0.408264	1405	0.515692	0.916639	-0.056163	0.234382	1367	0.81066	0.993871	-0.0734044	0.257525	1372	0.775659	0.990772	0.500576	0.350831	1416	0.153851	0.966161	0.508007	0.298476	1386	0.0889803	0.920514	0.0174333	0.454885	1388	0.969435	0.991747
BMI	rs2926614	8	76301610	T	C	-0.0189	3.2e-17	688042	0.189	-0.661914	0.333942	1405	0.0476619	0.869587	0.362854	0.194097	1367	0.0617766	0.943145	-0.131612	0.210504	1372	0.531929	0.990772	-0.470622	0.287311	1416	0.101641	0.966161	0.419146	0.24684	1386	0.0897257	0.920514	0.348736	0.371358	1388	0.347853	0.991747
BMI	rs11670142	19	49650471	G	T	0.0111	4.7e-10	681469	0.3434	-0.0066702	0.266828	1405	0.98006	0.994282	-0.0363857	0.15338	1367	0.812518	0.993871	0.0309057	0.167417	1372	0.853568	0.990772	0.146346	0.229424	1416	0.523652	0.966161	0.33102	0.195126	1386	0.0900289	0.920514	0.00798798	0.295526	1388	0.97844	0.991747
BMI	rs2907948	7	150638484	A	G	-0.0141	1.3e-13	794299	0.1903	-0.110069	0.328894	1405	0.737929	0.973405	0.02695	0.188157	1367	0.886129	0.993871	0.268248	0.204838	1372	0.190565	0.978631	-0.201089	0.282596	1416	0.476845	0.966161	-0.405016	0.239291	1386	0.0907645	0.920514	-0.521849	0.361419	1388	0.148998	0.991747
BMI	rs9806058	14	35673470	T	A	-0.0164	4e-10	690566	0.1432	1.32674	0.390855	1405	0.00070698	0.616549	0.00148107	0.226093	1367	0.994774	0.997005	-0.302744	0.247737	1372	0.221906	0.978631	0.751158	0.337301	1416	0.0261074	0.966161	0.478395	0.287167	1386	0.0959585	0.920514	0.210027	0.435014	1388	0.629311	0.991747
BMI	rs621042	12	18789007	A	C	-0.0107	6.3e-10	689121	0.422	0.0387328	0.277286	1405	0.888929	0.98481	0.183479	0.159434	1367	0.250013	0.943145	0.0543334	0.173948	1372	0.754819	0.990772	0.00356523	0.238539	1416	0.988077	0.992518	-0.335652	0.202744	1386	0.0980418	0.920514	-0.0596537	0.306689	1388	0.845806	0.991747
BMI	rs329651	11	133767622	G	T	-0.0164	9e-15	779232	0.1438	0.0857696	0.391265	1405	0.826518	0.976099	-0.0607254	0.22498	1367	0.787267	0.992591	0.357353	0.243417	1372	0.142316	0.978631	0.150189	0.336676	1416	0.655599	0.966161	0.472666	0.285547	1386	0.0980921	0.920514	0.0481263	0.430715	1388	0.911049	0.991747
BMI	rs10732321	9	10387163	C	G	0.0145	5.1e-09	678153	0.1458	1.16211	0.372533	1405	0.0018489	0.616549	-0.0059461	0.217401	1367	0.978184	0.997005	0.0726722	0.233612	1372	0.755787	0.990772	0.791236	0.318391	1416	0.013067	0.966161	0.451119	0.273225	1386	0.0989485	0.920514	0.270433	0.409011	1388	0.508603	0.991747
BMI	rs12660451	6	156013082	C	G	0.0113	1.7e-08	684834	0.2563	0.131091	0.302393	1405	0.66471	0.965048	-0.13459	0.173815	1367	0.438873	0.943145	-0.0139572	0.189553	1372	0.941314	0.996224	0.0473747	0.260084	1416	0.85549	0.978015	0.363265	0.220646	1386	0.0999171	0.920514	-0.133808	0.334944	1388	0.689591	0.991747
BMI	rs1218822	13	28011963	G	A	-0.0168	1.9e-22	794711	0.4068	0.393344	0.272543	1405	0.14918	0.916639	-0.166638	0.156401	1367	0.286862	0.943145	-0.11817	0.170644	1372	0.488747	0.990772	0.153512	0.234168	1416	0.512213	0.966161	0.325958	0.198363	1386	0.100561	0.920514	0.505517	0.300222	1388	0.0924445	0.991747
BMI	rs17522122	14	33302882	T	G	0.0159	1.5e-21	774342	0.4323	0.16993	0.261336	1405	0.515646	0.916639	0.0271855	0.150629	1367	0.856802	0.993871	0.191988	0.16372	1372	0.241138	0.978631	-0.0155305	0.225206	1416	0.94503	0.984638	-0.314985	0.191982	1386	0.101088	0.920514	-0.161902	0.289454	1388	0.576023	0.991747
BMI	rs12675063	8	132879047	T	A	0.0156	1.3e-09	789771	0.1603	-0.325699	0.383138	1405	0.395425	0.916639	-0.140252	0.221622	1367	0.526944	0.943145	-0.253135	0.238982	1372	0.289688	0.978631	-0.139212	0.329845	1416	0.673052	0.966161	0.460733	0.280978	1386	0.101287	0.920514	0.492396	0.422726	1388	0.244297	0.991747
BMI	rs9514131	13	104090848	T	G	-0.0154	5.6e-09	684854	0.09497	-1.30116	0.522354	1405	0.0128553	0.757624	0.111525	0.301175	1367	0.711219	0.973578	0.224321	0.328454	1372	0.494749	0.990772	-0.0053564	0.450193	1416	0.990509	0.99273	-0.624106	0.380985	1386	0.101621	0.920514	-0.402267	0.577492	1388	0.486187	0.991747
BMI	rs10858334	9	137989785	G	C	0.0143	2.7e-08	672640	0.1211	-0.294	0.412023	1405	0.475624	0.916639	0.0389123	0.2366	1367	0.86939	0.993871	-0.0453437	0.257686	1372	0.860348	0.991174	-0.637289	0.351927	1416	0.0703763	0.966161	-0.489738	0.29927	1386	0.101976	0.920514	-0.360082	0.451464	1388	0.425247	0.991747
BMI	rs7209235	17	73759552	G	A	0.0111	8e-09	683445	0.3075	-0.0435866	0.292834	1405	0.881698	0.98481	-0.0273253	0.168131	1367	0.870917	0.993871	0.195777	0.183763	1372	0.286896	0.978631	-0.276807	0.251805	1416	0.271829	0.966161	0.348307	0.213556	1386	0.103122	0.920514	-0.193184	0.324351	1388	0.55154	0.991747
BMI	rs12549150	8	11422936	T	C	0.017	6.2e-22	677660	0.4768	-0.048337	0.270218	1405	0.858057	0.981618	-0.137302	0.155456	1367	0.377272	0.943145	-0.0301068	0.169262	1372	0.858851	0.991056	0.0772246	0.232041	1416	0.73933	0.966161	0.319236	0.197158	1386	0.105636	0.920514	0.430591	0.297965	1388	0.148656	0.991747
BMI	rs12630999	3	136300927	G	A	-0.0175	8.5e-21	789241	0.2596	0.0250974	0.28763	1405	0.930481	0.985293	0.279114	0.164676	1367	0.0903202	0.943145	0.122187	0.179617	1372	0.496452	0.990772	-0.0225819	0.247466	1416	0.927305	0.984638	0.337196	0.209911	1386	0.108421	0.920514	0.566961	0.316304	1388	0.0732793	0.991747
BMI	rs857601	6	44805214	G	T	-0.0104	3e-08	691300	0.2643	0.107749	0.300191	1405	0.719697	0.973405	-0.0042289	0.17277	1367	0.980476	0.997005	0.034405	0.187919	1372	0.854759	0.990772	0.370319	0.258008	1416	0.151424	0.966161	0.351923	0.219661	1386	0.109359	0.920514	0.455907	0.33145	1388	0.169203	0.991747
BMI	rs3764835	2	159519368	A	G	-0.0141	3.1e-09	689505	0.1208	-0.13644	0.408609	1405	0.738495	0.973405	0.187402	0.236046	1367	0.42738	0.943145	0.466975	0.257873	1372	0.0703821	0.978631	-0.161624	0.351227	1416	0.645467	0.966161	0.480332	0.299949	1386	0.109523	0.920514	-0.871845	0.451849	1388	0.0538737	0.991747
BMI	rs4929923	11	8639200	T	C	-0.0181	7.2e-27	794933	0.3702	0.216421	0.262843	1405	0.410429	0.916639	0.0194414	0.151579	1367	0.897963	0.993871	0.120709	0.164447	1372	0.463058	0.990772	-0.020719	0.226228	1416	0.927041	0.984638	-0.306925	0.192627	1386	0.111309	0.920514	-0.20143	0.290101	1388	0.487584	0.991747
BMI	rs8089514	18	69224478	A	T	0.0126	1.1e-11	668999	0.3362	0.0494967	0.286424	1405	0.862827	0.981618	0.0251792	0.164748	1367	0.878551	0.993871	0.00123248	0.178797	1372	0.994501	0.999826	-0.0540804	0.245989	1416	0.826021	0.96912	-0.333222	0.209426	1386	0.111812	0.920514	-0.348342	0.315067	1388	0.269088	0.991747
BMI	rs17513613	19	30286822	C	T	0.0186	3.6e-26	789575	0.2625	0.0430067	0.29522	1405	0.884198	0.98481	-0.0073903	0.169658	1367	0.965262	0.997005	-0.143507	0.184367	1372	0.436484	0.990772	-0.0249135	0.253668	1416	0.921777	0.984638	0.34131	0.215079	1386	0.112765	0.920514	0.0765942	0.32569	1388	0.814108	0.991747
BMI	rs676749	20	3026069	T	A	0.0104	1.7e-09	691753	0.4405	-0.252452	0.278456	1405	0.364767	0.916639	0.164494	0.160992	1367	0.307081	0.943145	-0.0218278	0.174459	1372	0.900449	0.996224	-0.296731	0.239948	1416	0.216424	0.966161	-0.325071	0.205169	1386	0.113332	0.920514	0.0695625	0.30872	1388	0.821759	0.991747
BMI	rs353547	3	52268866	T	C	0.0118	1.7e-12	794521	0.3787	-0.419196	0.274971	1405	0.127608	0.88977	-0.418279	0.15835	1367	0.00834955	0.644967	-0.343062	0.171897	1372	0.0461617	0.92974	-0.268725	0.2355	1416	0.25403	0.966161	-0.317406	0.200953	1386	0.114451	0.920514	0.0618867	0.302505	1388	0.83793	0.991747
BMI	rs818524	1	85201228	T	C	-0.0106	3.4e-08	670078	0.4024	0.189838	0.286566	1405	0.507786	0.916639	0.0671219	0.165302	1367	0.684765	0.972051	-0.108449	0.179525	1372	0.545886	0.990772	-0.085809	0.246203	1416	0.727495	0.966161	-0.32888	0.209243	1386	0.116237	0.920514	-0.119833	0.316631	1388	0.705145	0.991747
BMI	rs6710871	2	143960593	A	G	0.0179	1e-13	741157	0.1662	-0.493994	0.350483	1405	0.158921	0.916639	-0.273361	0.202314	1367	0.176867	0.943145	0.1135	0.219878	1372	0.605801	0.990772	-0.406713	0.30136	1416	0.177365	0.966161	-0.404123	0.257242	1386	0.116417	0.920514	-0.325744	0.388444	1388	0.401847	0.991747
BMI	rs10942476	5	86172206	A	G	-0.0099	9.5e-09	686324	0.4817	0.185582	0.286167	1405	0.516763	0.916639	0.0280594	0.165167	1367	0.865126	0.993871	-0.0492899	0.179147	1372	0.783254	0.990772	0.297779	0.245684	1416	0.225699	0.966161	0.328788	0.209448	1386	0.116696	0.920514	0.541817	0.31553	1388	0.0861744	0.991747
BMI	rs2477017	10	34911879	A	G	0.0104	5.4e-09	691826	0.4644	0.573512	0.285143	1405	0.0444845	0.869587	0.263662	0.164418	1367	0.109035	0.943145	0.306765	0.178704	1372	0.0862782	0.978631	0.123452	0.245101	1416	0.614566	0.966161	0.326052	0.208404	1386	0.117926	0.920514	0.359358	0.314545	1388	0.253458	0.991747
BMI	rs10788915	1	50165334	G	C	0.0187	2.6e-24	691765	0.3187	-0.449161	0.30695	1405	0.14361	0.916639	-0.0522048	0.177027	1367	0.768118	0.985072	-0.0394933	0.192323	1372	0.837331	0.990772	-0.334092	0.263656	1416	0.205311	0.966161	-0.351217	0.224717	1386	0.118299	0.920514	-0.443171	0.338929	1388	0.19124	0.991747
BMI	rs17806379	20	51107290	T	C	-0.0258	1.5e-30	690043	0.1484	0.00889234	0.368864	1405	0.98077	0.994282	0.139581	0.212312	1367	0.511013	0.943145	0.0254461	0.230517	1372	0.912119	0.996224	0.358648	0.316621	1416	0.257518	0.966161	0.421612	0.270018	1386	0.118655	0.920514	0.17587	0.406908	1388	0.665657	0.991747
BMI	rs17767510	4	68156598	C	G	0.0129	1.9e-08	683125	0.1244	0.130373	0.401832	1405	0.745648	0.973405	0.134653	0.231958	1367	0.561671	0.952555	0.111978	0.253071	1372	0.658214	0.990772	0.642309	0.344309	1416	0.0623192	0.966161	-0.45797	0.294218	1386	0.119804	0.920514	-0.0612493	0.445416	1388	0.890648	0.991747
BMI	rs1593304	7	131619847	A	G	0.0126	1.3e-08	669507	0.3187	-0.157144	0.312895	1405	0.615587	0.952961	-0.0182375	0.179414	1367	0.919049	0.993871	-0.403246	0.195296	1372	0.0391315	0.92974	-0.14062	0.268997	1416	0.601227	0.966161	-0.354622	0.228234	1386	0.12047	0.920514	-0.38692	0.345149	1388	0.262474	0.991747
BMI	rs802460	7	86260816	C	T	-0.0107	2.8e-09	691882	0.3343	0.0959789	0.279656	1405	0.731498	0.973405	0.0293279	0.161454	1367	0.855885	0.993871	0.209429	0.17539	1372	0.232657	0.978631	0.25528	0.23989	1416	0.287442	0.966161	0.359602	0.204112	1386	0.0783281	0.872781	0.400494	0.309152	1388	0.19538	0.991747
BMI	rs11496125	7	103417557	T	C	0.0169	3e-22	684574	0.422	0.0106649	0.253299	1405	0.966422	0.992802	0.323407	0.145688	1367	0.0265941	0.849112	0.175584	0.157953	1372	0.266496	0.978631	0.168852	0.217681	1416	0.438065	0.966161	-0.325467	0.185201	1386	0.0790775	0.872781	-0.252095	0.278618	1388	0.365726	0.991747
BMI	rs2170382	8	74689288	T	C	0.0172	2.4e-10	690485	0.1077	-0.166888	0.425444	1405	0.694921	0.973405	0.416827	0.242787	1367	0.086237	0.943145	-0.117239	0.265702	1372	0.659108	0.990772	-0.493235	0.365698	1416	0.177635	0.966161	0.608386	0.308921	1386	0.0491092	0.86726	0.0164033	0.469317	1388	0.972124	0.991747
BMI	rs999889	10	84279949	A	G	-0.0108	1.4e-08	690572	0.3869	-0.428148	0.284399	1405	0.132435	0.903794	-0.114627	0.164406	1367	0.485787	0.943145	-0.239924	0.177723	1372	0.177246	0.978631	-0.398982	0.244375	1416	0.102765	0.966161	-0.409822	0.208604	1386	0.0496622	0.86726	-0.173857	0.313907	1388	0.579772	0.991747
BMI	rs733594	8	85077686	C	T	-0.0138	5.9e-14	791828	0.2963	0.365966	0.304825	1405	0.23012	0.916639	-0.0121308	0.17593	1367	0.945037	0.997005	-0.0479709	0.190671	1372	0.801396	0.990772	0.145823	0.261449	1416	0.577105	0.966161	0.43599	0.222544	1386	0.0503011	0.86726	0.367081	0.33551	1388	0.274102	0.991747
BMI	rs11105839	12	91237920	A	T	-0.0109	1.1e-10	781573	0.4011	0.0786532	0.263939	1405	0.765749	0.973405	-0.23674	0.151707	1367	0.118875	0.943145	-0.231142	0.165018	1372	0.161531	0.978631	0.126061	0.22695	1416	0.578669	0.966161	0.375728	0.192513	1386	0.0511763	0.86726	-0.143037	0.292015	1388	0.624333	0.991747
BMI	rs4989244	9	102100348	A	G	-0.0113	7.5e-11	690466	0.3369	0.00534857	0.28484	1405	0.985021	0.995568	-0.0164155	0.164516	1367	0.920533	0.993871	-0.0336558	0.178446	1372	0.850431	0.990772	0.286591	0.244799	1416	0.24191	0.966161	-0.403941	0.208625	1386	0.0530472	0.86726	-0.609534	0.314467	1388	0.05279	0.991747
BMI	rs6879326	5	59208302	T	C	-0.0098	1.3e-08	690684	0.4758	0.220888	0.271315	1405	0.415705	0.916639	-0.032542	0.156027	1367	0.834817	0.993871	0.0275464	0.169499	1372	0.870923	0.993096	0.258568	0.232429	1416	0.266131	0.966161	-0.381983	0.197495	1386	0.0533011	0.86726	0.197573	0.297928	1388	0.507341	0.991747
BMI	rs12519552	5	106910910	G	A	0.0132	2.7e-08	691439	0.1672	-0.255375	0.368145	1405	0.487997	0.916639	-0.252088	0.211069	1367	0.232555	0.943145	0.303893	0.229552	1372	0.185774	0.978631	-0.26355	0.316699	1416	0.40545	0.966161	0.519311	0.268556	1386	0.0533531	0.86726	0.334095	0.405881	1388	0.410574	0.991747
BMI	rs12477088	2	67841326	C	T	-0.0145	8.9e-17	690936	0.4452	0.274595	0.262464	1405	0.295641	0.916639	0.0650895	0.150856	1367	0.666197	0.968423	-0.173254	0.16461	1372	0.29275	0.978631	0.0711811	0.225663	1416	0.752481	0.966161	-0.361683	0.191653	1386	0.059347	0.86726	-0.400862	0.290185	1388	0.16738	0.991747
BMI	rs12065553	1	80793118	G	A	0.0115	8.9e-10	691372	0.2782	-0.0513259	0.340703	1405	0.880276	0.98481	-0.0990943	0.195653	1367	0.612602	0.952555	-0.190728	0.213712	1372	0.372308	0.984915	-0.188635	0.292501	1416	0.519095	0.966161	0.466662	0.248498	1386	0.060602	0.86726	0.351579	0.376625	1388	0.350727	0.991747
BMI	rs12680842	8	95582606	G	A	-0.0133	4.4e-14	782549	0.3202	0.235345	0.277239	1405	0.396088	0.916639	0.173492	0.159333	1367	0.27641	0.943145	-0.154185	0.173379	1372	0.374001	0.984915	0.0932794	0.237659	1416	0.694754	0.966161	0.37719	0.201652	1386	0.0616276	0.86726	0.353312	0.30489	1388	0.246731	0.991747
BMI	rs17739702	6	27329267	G	C	-0.0182	8.9e-09	692559	0.08075	-0.037184	0.488598	1405	0.939348	0.987505	-0.335167	0.280372	1367	0.232127	0.943145	0.0885975	0.306865	1372	0.772841	0.990772	-0.0137979	0.419047	1416	0.973738	0.985462	0.66554	0.356148	1386	0.0618749	0.86726	0.816073	0.53927	1388	0.130435	0.991747
BMI	rs6433243	2	171605495	T	C	0.0102	1.2e-08	691231	0.3634	-0.602156	0.272675	1405	0.027384	0.757624	-0.122274	0.157423	1367	0.437458	0.943145	0.133324	0.170739	1372	0.435018	0.990772	-0.507464	0.234126	1416	0.0303653	0.966161	0.372666	0.199584	1386	0.0620852	0.86726	-0.136078	0.300701	1388	0.650955	0.991747
BMI	rs217671	14	62360464	G	A	0.0144	1.3e-13	691456	0.2847	0.0301537	0.28559	1405	0.915928	0.98481	0.132522	0.163807	1367	0.418648	0.943145	0.0906291	0.178804	1372	0.612333	0.990772	-0.0391683	0.245125	1416	0.87307	0.982786	-0.385355	0.207632	1386	0.0636746	0.86726	0.0537457	0.314578	1388	0.864367	0.991747
BMI	rs3902951	14	69789755	G	T	0.0134	7e-12	773819	0.2569	-0.389375	0.320355	1405	0.224401	0.916639	-0.187833	0.184095	1367	0.307766	0.943145	-0.051511	0.201457	1372	0.798227	0.990772	-0.134242	0.275855	1416	0.62659	0.966161	-0.434484	0.234329	1386	0.0639299	0.86726	-0.61968	0.355438	1388	0.0814826	0.991747
BMI	rs12888545	14	88308044	G	A	0.0136	9.1e-12	688605	0.1796	-0.298459	0.335106	1405	0.373276	0.916639	-0.161178	0.191748	1367	0.400736	0.943145	-0.214274	0.211639	1372	0.311502	0.978631	0.173684	0.28823	1416	0.54688	0.966161	-0.450818	0.243756	1386	0.0646053	0.86726	-0.226182	0.372662	1388	0.543993	0.991747
BMI	rs10840606	11	2234690	G	A	0.0164	3.2e-12	642006	0.1476	-0.204511	0.373526	1405	0.584113	0.94719	0.280869	0.214139	1367	0.189872	0.943145	0.101718	0.234215	1372	0.664143	0.990772	-0.233478	0.320433	1416	0.466347	0.966161	0.50051	0.271796	1386	0.0657651	0.86726	-0.642963	0.412024	1388	0.118872	0.991747
BMI	rs1038088	17	28074563	G	T	0.0117	4.6e-13	794680	0.4575	-0.331533	0.265547	1405	0.212062	0.916639	0.0805746	0.1528	1367	0.598057	0.952555	-0.083241	0.166117	1372	0.616384	0.990772	-0.188898	0.227692	1416	0.406892	0.966161	0.355323	0.193389	1386	0.0663745	0.86726	0.0298126	0.292346	1388	0.91879	0.991747
BMI	rs7716275	5	137631073	T	G	-0.0132	2.2e-10	781833	0.1607	-0.387133	0.360004	1405	0.282401	0.916639	0.0460085	0.206732	1367	0.823919	0.993871	-0.0785507	0.224971	1372	0.727024	0.990772	-0.506315	0.309113	1416	0.101653	0.966161	-0.481638	0.262606	1386	0.0668595	0.86726	-0.626004	0.396282	1388	0.114407	0.991747
BMI	rs12189178	5	50914726	T	C	0.0364	2.2e-15	789640	0.03057	-1.79461	0.797441	1405	0.0245749	0.757624	-0.473946	0.456263	1367	0.299103	0.943145	-0.0946676	0.515958	1372	0.854449	0.990772	-1.05969	0.684799	1416	0.12198	0.966161	1.05703	0.579763	1386	0.0684881	0.86726	-0.292779	0.909088	1388	0.747458	0.991747
BMI	rs13240600	7	99064466	G	A	-0.0204	3.5e-17	692233	0.2798	-0.473581	0.35062	1405	0.177012	0.916639	-0.226016	0.202789	1367	0.265248	0.943145	-0.330431	0.220785	1372	0.134725	0.978631	-0.31146	0.301069	1416	0.301074	0.966161	0.469574	0.257579	1386	0.0685168	0.86726	-0.0159143	0.389307	1388	0.967399	0.991747
BMI	rs12316047	12	108393845	A	G	-0.017	1.4e-16	689178	0.1685	-0.152229	0.35504	1405	0.66816	0.965048	-0.537754	0.203402	1367	0.00829297	0.644967	-0.0599695	0.222596	1372	0.787655	0.990772	0.172254	0.305458	1416	0.572899	0.966161	-0.472079	0.259327	1386	0.0689156	0.86726	0.239575	0.393069	1388	0.542294	0.991747
BMI	rs7561278	2	48954905	C	T	-0.0159	5.7e-14	677253	0.1819	-0.218748	0.38363	1405	0.56863	0.941432	0.309498	0.221962	1367	0.163433	0.943145	0.534586	0.238878	1372	0.0253893	0.92974	-0.0671106	0.329878	1416	0.83882	0.973012	0.511872	0.282541	1386	0.0702554	0.86726	0.250634	0.422546	1388	0.553178	0.991747
BMI	rs2733287	12	41880909	A	C	-0.0157	6.8e-20	681730	0.4663	-0.17872	0.265954	1405	0.501698	0.916639	-0.119773	0.15327	1367	0.434673	0.943145	-0.273528	0.166343	1372	0.100333	0.978631	0.141692	0.228632	1416	0.535531	0.966161	-0.351258	0.194347	1386	0.070923	0.86726	-0.354399	0.293322	1388	0.227169	0.991747
BMI	rs1912631	15	47914691	A	G	-0.0119	1.3e-11	685439	0.4232	-0.756076	0.263575	1405	0.00418587	0.748434	-0.182082	0.152538	1367	0.23281	0.943145	0.238589	0.165643	1372	0.14999	0.978631	-0.432771	0.226606	1416	0.0563631	0.966161	-0.348706	0.193357	1386	0.0715394	0.86726	0.0571743	0.291847	1388	0.844713	0.991747
BMI	rs7995015	13	54828961	T	G	0.0128	1.1e-11	685310	0.3849	0.35226	0.297416	1405	0.236456	0.916639	-0.301714	0.171426	1367	0.0786297	0.943145	-0.214274	0.18644	1372	0.250636	0.978631	0.201565	0.255797	1416	0.430837	0.966161	0.39232	0.217855	1386	0.071948	0.86726	0.0399555	0.32893	1388	0.903336	0.991747
BMI	rs11658335	17	80084821	C	T	0.0101	3.2e-09	729474	0.4727	0.0803241	0.249587	1405	0.747631	0.973405	0.120557	0.143865	1367	0.402186	0.943145	0.142464	0.156778	1372	0.363669	0.984915	0.0190763	0.214793	1416	0.929244	0.984638	0.327424	0.182759	1386	0.0734235	0.86726	0.215437	0.277129	1388	0.437063	0.991747
BMI	rs11509195	7	113688407	G	A	-0.0148	1e-17	676919	0.3995	0.264141	0.315504	1405	0.402623	0.916639	-0.240698	0.182077	1367	0.186406	0.943145	0.0987056	0.198046	1372	0.618285	0.990772	0.285112	0.2713	1416	0.29348	0.966161	0.413064	0.23119	1386	0.0742081	0.86726	0.58059	0.349071	1388	0.0964918	0.991747
BMI	rs2875762	6	124925032	C	G	0.0139	1.2e-11	685199	0.2816	-0.0530757	0.297948	1405	0.858641	0.981618	0.309243	0.17218	1367	0.0727101	0.943145	-0.0392058	0.186066	1372	0.833146	0.990772	0.204832	0.255907	1416	0.423606	0.966161	-0.38848	0.2183	1386	0.0753667	0.86726	-0.0726299	0.328173	1388	0.82488	0.991747
BMI	rs2161097	5	103945178	T	C	0.0096	2.5e-08	692354	0.4291	0.0231466	0.268403	1405	0.931289	0.985293	-0.0392402	0.154513	1367	0.799565	0.992591	-0.0503694	0.168017	1372	0.764385	0.990772	0.131577	0.230816	1416	0.568734	0.966161	-0.348486	0.196345	1386	0.076142	0.86726	-0.395558	0.296058	1388	0.181743	0.991747
BMI	rs6738445	2	172599615	T	C	-0.0133	1.9e-13	787966	0.3428	0.410953	0.311686	1405	0.187558	0.916639	-0.0939478	0.179389	1367	0.600565	0.952555	0.128253	0.195333	1372	0.51156	0.990772	0.376583	0.268104	1416	0.160357	0.966161	0.512584	0.228019	1386	0.0247352	0.841976	0.18161	0.344716	1388	0.59839	0.991747
BMI	rs4518345	5	27185904	A	G	-0.0117	1e-09	688609	0.2457	0.405356	0.308969	1405	0.189748	0.916639	-0.245065	0.178205	1367	0.169301	0.943145	0.0810084	0.193212	1372	0.675084	0.990772	0.130885	0.265701	1416	0.62237	0.966161	-0.505503	0.226263	1386	0.0256344	0.841976	-0.520662	0.340428	1388	0.126387	0.991747
BMI	rs591088	1	42438196	C	T	0.0097	1.6e-08	691522	0.4483	0.375196	0.263181	1405	0.154202	0.916639	0.140625	0.151754	1367	0.354267	0.943145	-0.0803033	0.164522	1372	0.625558	0.990772	0.167093	0.226456	1416	0.460722	0.966161	0.426525	0.192396	1386	0.0267925	0.841976	0.390552	0.290263	1388	0.178682	0.991747
BMI	rs3930349	17	31475545	A	C	-0.0144	4.2e-12	691857	0.2123	-0.510029	0.328387	1405	0.120618	0.883874	-0.276126	0.188078	1367	0.142297	0.943145	0.0431529	0.205635	1372	0.833815	0.990772	-0.47232	0.281631	1416	0.0937476	0.966161	-0.52661	0.238551	1386	0.0274412	0.841976	-0.468993	0.362014	1388	0.195361	0.991747
BMI	rs2195086	2	60814466	G	T	0.0133	9.4e-09	687371	0.1026	0.437845	0.448938	1405	0.329586	0.916639	-0.279013	0.258558	1367	0.28073	0.943145	-0.0232409	0.280424	1372	0.933961	0.996224	0.0841299	0.386449	1416	0.827695	0.96912	0.7217	0.327263	1386	0.0276013	0.841976	0.674064	0.49498	1388	0.173484	0.991747
BMI	rs10886017	10	118672531	A	C	0.0152	1.4e-15	786354	0.2973	0.220434	0.294171	1405	0.45378	0.916639	-0.103574	0.169437	1367	0.541112	0.943145	-0.160799	0.184179	1372	0.382786	0.984915	0.283169	0.252711	1416	0.26268	0.966161	0.471073	0.215175	1386	0.0287463	0.841976	0.49632	0.324907	1388	0.126849	0.991747
BMI	rs17446091	8	27167942	C	T	0.0123	1.8e-09	793600	0.2019	0.728251	0.317563	1405	0.0219819	0.757624	0.131348	0.182963	1367	0.472946	0.943145	0.350332	0.198497	1372	0.0778013	0.978631	0.0791117	0.273048	1416	0.772062	0.966161	-0.505005	0.231505	1386	0.029323	0.841976	-0.360742	0.349472	1388	0.302138	0.991747
BMI	rs10830452	11	89966202	G	A	0.0111	2.1e-09	690453	0.304	0.0661439	0.290748	1405	0.820072	0.975217	0.238048	0.168683	1367	0.158411	0.943145	0.222622	0.183043	1372	0.224109	0.978631	0.403514	0.249461	1416	0.105986	0.966161	-0.465542	0.213669	1386	0.029516	0.841976	0.0181157	0.322043	1388	0.955149	0.991747
BMI	rs263041	3	183522231	A	G	0.0124	2.2e-12	692268	0.2944	0.0995335	0.297398	1405	0.737916	0.973405	0.110829	0.170943	1367	0.516875	0.943145	0.0751215	0.185622	1372	0.685761	0.990772	0.280818	0.255668	1416	0.272232	0.966161	0.470611	0.217274	1386	0.0304843	0.841976	-0.0798254	0.327746	1388	0.807609	0.991747
BMI	rs17405819	8	76806584	C	T	-0.0215	4.3e-33	795493	0.2545	-0.20156	0.288483	1405	0.484864	0.916639	-0.0714046	0.166911	1367	0.668865	0.96915	-0.386875	0.180977	1372	0.0327193	0.92974	0.0973004	0.248085	1416	0.694966	0.966161	0.454587	0.210951	1386	0.0313397	0.841976	0.151059	0.319529	1388	0.636463	0.991747
BMI	rs7123876	11	72444583	C	T	0.0119	2.2e-10	793551	0.2355	-0.0026864	0.309629	1405	0.993079	0.996423	-0.0808032	0.177388	1367	0.648812	0.965121	0.0117038	0.193285	1372	0.951725	0.996224	0.24238	0.266221	1416	0.362742	0.966161	0.48306	0.225294	1386	0.0321972	0.841976	0.121971	0.34097	1388	0.720609	0.991747
BMI	rs3007105	14	47367616	T	C	0.0142	1.1e-17	785488	0.4501	0.24798	0.275388	1405	0.368025	0.916639	0.0456263	0.158692	1367	0.773763	0.986796	0.122381	0.17258	1372	0.478368	0.990772	0.454525	0.236356	1416	0.0546761	0.966161	-0.428207	0.200927	1386	0.0332534	0.841976	-0.206011	0.304756	1388	0.499161	0.991747
BMI	rs13317489	3	107280241	A	G	0.0133	3.3e-09	688984	0.1411	-0.0476388	0.375042	1405	0.898941	0.98481	-0.0286618	0.217049	1367	0.894963	0.993871	-0.230724	0.233963	1372	0.324232	0.978631	0.0853791	0.322444	1416	0.791212	0.966317	-0.583225	0.275614	1386	0.0345163	0.841976	-0.204006	0.413405	1388	0.621754	0.991747
BMI	rs1668633	13	78371890	C	T	-0.01	8.7e-09	688791	0.4541	0.315727	0.261904	1405	0.228213	0.916639	-0.0094026	0.151031	1367	0.950368	0.997005	0.150093	0.164513	1372	0.361749	0.984915	0.232018	0.225146	1416	0.302944	0.966161	0.401302	0.191286	1386	0.0360952	0.841976	0.16455	0.29028	1388	0.570896	0.991747
BMI	rs329122	5	133864599	A	G	-0.0125	4.3e-14	792745	0.4662	0.0754692	0.262379	1405	0.77367	0.973405	0.00850871	0.150583	1367	0.954948	0.997005	-0.313538	0.163882	1372	0.0559339	0.92974	0.183212	0.225171	1416	0.415979	0.966161	-0.399389	0.19097	1386	0.0366778	0.841976	-0.310725	0.289119	1388	0.282685	0.991747
BMI	rs12779328	10	12943973	T	C	0.0105	4.5e-08	690736	0.2449	-0.268366	0.320541	1405	0.402607	0.916639	0.124815	0.18566	1367	0.501523	0.943145	0.201164	0.199667	1372	0.313876	0.978631	0.0926263	0.275638	1416	0.736889	0.966161	0.490146	0.235248	1386	0.0373877	0.841976	0.336668	0.352383	1388	0.339541	0.991747
BMI	rs1982441	8	28021769	T	G	0.0175	7e-12	687705	0.1054	0.605379	0.432203	1405	0.161532	0.916639	-0.161586	0.249272	1367	0.516944	0.943145	0.00745552	0.270137	1372	0.977986	0.997535	0.265264	0.371937	1416	0.475842	0.966161	0.656488	0.315111	1386	0.0374036	0.841976	0.404754	0.47719	1388	0.396472	0.991747
BMI	rs726372	7	69320268	G	A	0.0112	1.9e-09	691639	0.3302	-0.167475	0.279867	1405	0.549663	0.935331	0.0569133	0.161324	1367	0.724302	0.979616	-0.126044	0.174435	1372	0.470061	0.990772	0.0766401	0.240454	1416	0.749978	0.966161	0.422763	0.20458	1386	0.0389691	0.841976	-0.158641	0.307818	1388	0.606376	0.991747
BMI	rs936227	15	75131959	A	G	-0.0118	2.3e-12	793122	0.451	0.0422794	0.267666	1405	0.874514	0.98481	0.101842	0.153985	1367	0.508482	0.943145	-0.227948	0.16827	1372	0.175754	0.978631	0.00306878	0.229762	1416	0.989345	0.992676	0.403329	0.19529	1386	0.0390839	0.841976	0.305297	0.296531	1388	0.303398	0.991747
BMI	rs17538472	4	163038241	T	C	0.0129	4.2e-09	675963	0.1414	-0.22835	0.390032	1405	0.55833	0.935331	0.260477	0.224042	1367	0.245187	0.943145	-0.0042318	0.245622	1372	0.986257	0.997535	-0.478156	0.335106	1416	0.153836	0.966161	0.584827	0.284128	1386	0.0397474	0.841976	0.860271	0.432119	1388	0.046698	0.991747
BMI	rs2429150	12	2152655	C	A	0.0111	2.7e-10	686276	0.476	0.266958	0.268664	1405	0.320566	0.916639	0.0175557	0.154193	1367	0.909369	0.993871	-0.020384	0.168276	1372	0.903603	0.996224	0.170865	0.230653	1416	0.458946	0.966161	0.396756	0.19503	1386	0.0421101	0.841976	0.329384	0.29643	1388	0.266689	0.991747
BMI	rs10259665	7	79061837	A	G	0.0109	4.7e-09	689364	0.332	-0.533723	0.279426	1405	0.0563295	0.875461	-0.0418289	0.161508	1367	0.795683	0.992591	-0.0289576	0.17475	1372	0.868411	0.993096	-0.488951	0.240454	1416	0.0421945	0.966161	-0.417534	0.205534	1386	0.0424001	0.841976	-0.37365	0.308518	1388	0.226061	0.991747
BMI	rs4671328	2	58935282	T	G	0.0219	2.2e-36	679487	0.4497	-0.0712521	0.266886	1405	0.789527	0.973405	0.175572	0.153729	1367	0.253619	0.943145	0.150589	0.167282	1372	0.368168	0.984915	-0.0875175	0.229337	1416	0.702807	0.966161	0.39524	0.195142	1386	0.0430196	0.841976	0.464112	0.294297	1388	0.115021	0.991747
BMI	rs1006896	3	88104411	C	A	-0.0234	5.5e-18	691892	0.0693	0.184873	0.513122	1405	0.718684	0.973405	-0.331007	0.29657	1367	0.26457	0.943145	-0.345425	0.32259	1372	0.284456	0.978631	-0.414017	0.440504	1416	0.347445	0.966161	-0.758966	0.37527	1386	0.0433231	0.841976	-0.499993	0.568247	1388	0.379074	0.991747
BMI	rs10795422	10	16759312	A	G	-0.0139	9.3e-14	692108	0.2638	-0.181939	0.306175	1405	0.552453	0.935331	-0.0421822	0.176534	1367	0.811183	0.993871	0.0135872	0.191465	1372	0.943436	0.996224	-0.150155	0.262915	1416	0.568012	0.966161	-0.529782	0.223862	1386	0.0180925	0.832553	-0.256787	0.337714	1388	0.447164	0.991747
BMI	rs12364470	11	134601012	G	T	0.0178	1.1e-15	787411	0.1252	0.0430166	0.382377	1405	0.910445	0.98481	-0.344539	0.219128	1367	0.116111	0.943145	-0.129433	0.240008	1372	0.589777	0.990772	0.120401	0.327098	1416	0.712862	0.966161	-0.646574	0.27661	1386	0.0195566	0.832553	-0.498108	0.419864	1388	0.235687	0.991747
BMI	rs1241986	18	6873954	G	A	0.0139	1.1e-08	687757	0.1806	-0.0495908	0.372064	1405	0.893987	0.98481	-0.0173702	0.214103	1367	0.935351	0.997005	-0.0043011	0.233228	1372	0.985289	0.997535	0.0786026	0.320098	1416	0.80606	0.96912	-0.661406	0.271718	1386	0.015053	0.799308	-0.685692	0.410981	1388	0.0954584	0.991747
BMI	rs961917	20	8308190	G	C	-0.0116	2.6e-09	683843	0.3331	0.298411	0.290647	1405	0.304733	0.916639	0.240353	0.167746	1367	0.152136	0.943145	-0.0190757	0.182619	1372	0.916823	0.996224	0.214106	0.249669	1416	0.391283	0.966161	-0.514908	0.212771	1386	0.0156488	0.799308	-0.17636	0.322253	1388	0.58428	0.991747
BMI	rs12468863	2	26940294	T	C	-0.0153	5.1e-21	784269	0.4696	-0.285866	0.297539	1405	0.336835	0.916639	0.052255	0.170931	1367	0.759873	0.982546	0.0654477	0.186906	1372	0.72627	0.990772	-0.36545	0.255959	1416	0.153582	0.966161	0.523503	0.217242	1386	0.0160934	0.799308	0.177169	0.330188	1388	0.591651	0.991747
BMI	rs6056413	20	9106087	A	T	0.0127	1.1e-08	748884	0.1342	0.00694991	0.396085	1405	0.986003	0.995568	0.375593	0.227527	1367	0.0990199	0.943145	0.0644753	0.247669	1372	0.79465	0.990772	-0.189535	0.340979	1416	0.578399	0.966161	0.75639	0.289449	1386	0.00906755	0.7136	0.569628	0.437606	1388	0.193239	0.991747
BMI	rs10772055	12	33379440	G	C	0.0172	2.1e-12	792168	0.2619	-0.208753	0.341093	1405	0.540629	0.933055	0.258408	0.197269	1367	0.190442	0.943145	0.258863	0.214302	1372	0.227283	0.978631	-0.409263	0.293295	1416	0.163117	0.966161	0.650748	0.249517	1386	0.00920511	0.7136	0.646761	0.377957	1388	0.0872688	0.991747
BMI	rs7239883	18	40147671	G	A	0.0126	6.1e-14	791591	0.3893	-0.438014	0.266002	1405	0.0998549	0.875461	-0.0481871	0.153641	1367	0.753847	0.982546	0.141781	0.166713	1372	0.395225	0.984915	-0.290162	0.2289	1416	0.205138	0.966161	-0.505514	0.194383	1386	0.00940589	0.7136	-0.475909	0.293701	1388	0.105379	0.991747
BMI	rs7683836	4	180167906	G	A	0.0114	6.3e-11	686968	0.4655	-0.192362	0.264984	1405	0.467999	0.916639	0.0769934	0.152402	1367	0.613502	0.952555	0.180607	0.165471	1372	0.27526	0.978631	0.00369024	0.22778	1416	0.987076	0.992518	-0.490579	0.192962	1386	0.0111196	0.7136	-0.308846	0.291668	1388	0.289834	0.991747
BMI	rs4012234	20	32553047	T	G	-0.0141	9.9e-16	689653	0.4501	-0.333821	0.286111	1405	0.243509	0.916639	0.26776	0.16457	1367	0.103964	0.943145	0.236427	0.179531	1372	0.188089	0.978631	-0.156257	0.245452	1416	0.524483	0.966161	-0.528635	0.208073	1386	0.0111749	0.7136	-0.184623	0.316149	1388	0.559333	0.991747
BMI	rs13072412	3	88749998	C	A	0.0108	3.1e-10	691851	0.4297	-0.163837	0.265246	1405	0.536887	0.9289	0.0601001	0.152903	1367	0.694338	0.97304	0.205512	0.166053	1372	0.216068	0.978631	-0.0912643	0.22795	1416	0.688945	0.966161	0.597304	0.192956	1386	0.00200422	0.700991	0.285765	0.29284	1388	0.329315	0.991747
BMI	rs5742914	15	74286929	T	C	0.0175	8.8e-11	679703	0.09072	0.11585	0.493487	1405	0.814432	0.975217	-0.26347	0.285964	1367	0.357038	0.943145	0.300713	0.307611	1372	0.328458	0.978631	-0.396051	0.424241	1416	0.350696	0.966161	-1.07034	0.362059	1386	0.00316719	0.700991	-0.0683516	0.543168	1388	0.899878	0.991747
BMI	rs6265	11	27679916	T	C	-0.0412	1e-86	795458	0.1584	-0.0491398	0.343188	1405	0.886164	0.98481	0.100774	0.197863	1367	0.610617	0.952555	0.361953	0.213944	1372	0.0909105	0.978631	0.0515485	0.29495	1416	0.861285	0.979034	-0.722186	0.25061	1386	0.00401663	0.700991	-0.493601	0.377823	1388	0.191623	0.991747
BMI	rs10497810	2	198895732	T	C	-0.0167	5.9e-14	691404	0.1888	0.324983	0.332754	1405	0.328913	0.916639	0.0989544	0.192689	1367	0.607655	0.952555	-0.299657	0.209892	1372	0.153617	0.978631	0.0208406	0.286396	1416	0.942001	0.984638	-0.681977	0.244146	1386	0.00528944	0.700991	-0.656668	0.369075	1388	0.075423	0.991747
BMI	rs7640424	3	107820063	T	C	-0.0136	2.3e-14	790612	0.2238	-0.0595939	0.345349	1405	0.863021	0.981618	0.122617	0.198668	1367	0.537212	0.943145	0.125444	0.21619	1372	0.561844	0.990772	-0.0822993	0.296394	1416	0.781308	0.966161	-0.699952	0.251288	1386	0.00541854	0.700991	-0.750557	0.379248	1388	0.0480073	0.991747
BMI	rs329277	7	35080931	G	T	0.0099	1.1e-08	686149	0.4776	0.301987	0.282407	1405	0.285105	0.916639	-0.121535	0.163409	1367	0.45716	0.943145	0.058592	0.177164	1372	0.740905	0.990772	-0.185606	0.243256	1416	0.445587	0.966161	0.564957	0.206386	1386	0.00627285	0.700991	0.514625	0.312408	1388	0.0997274	0.991747
BMI	rs13184896	5	122734005	T	G	-0.0133	3.3e-16	794825	0.3893	0.0734473	0.262226	1405	0.779449	0.973405	0.0589257	0.151456	1367	0.697291	0.97304	0.106619	0.164615	1372	0.517298	0.990772	0.143115	0.225584	1416	0.52591	0.966161	0.0469076	0.192297	1386	0.807319	0.999322	-0.591809	0.290133	1388	0.0415621	0.956518
BMI	rs4906908	15	27040082	G	T	0.0103	2.5e-09	691345	0.4918	-0.0327332	0.277055	1405	0.905968	0.98481	-0.0704919	0.159853	1367	0.659298	0.968423	-0.026561	0.172796	1372	0.877859	0.993592	-0.409305	0.237607	1416	0.0851783	0.966161	0.0233377	0.202998	1386	0.90849	0.999322	0.628526	0.303798	1388	0.0387422	0.956518
BMI	rs175165	22	20116015	G	T	-0.0103	5.2e-09	690545	0.4124	-0.0656539	0.27303	1405	0.810006	0.975217	-0.0559431	0.15729	1367	0.722145	0.979616	0.0048507	0.171522	1372	0.977443	0.997535	-0.30588	0.234504	1416	0.192321	0.966161	-0.205614	0.200108	1386	0.304358	0.967971	-0.625834	0.301966	1388	0.0384019	0.956518
BMI	rs1503526	5	63020706	C	T	0.014	5.5e-17	747347	0.4363	-0.0654763	0.272231	1405	0.809964	0.975217	-0.320016	0.156236	1367	0.0407252	0.931534	-0.11011	0.171562	1372	0.521106	0.990772	-0.252024	0.233085	1416	0.27977	0.966161	0.191637	0.19821	1386	0.333797	0.967971	0.610001	0.30054	1388	0.042581	0.956518
BMI	rs7742595	6	64161733	T	C	0.0111	1.6e-10	690444	0.4912	-0.450683	0.282576	1405	0.11096	0.875461	0.0425121	0.163229	1367	0.79456	0.992591	-0.0545815	0.177188	1372	0.758098	0.990772	-0.057014	0.242907	1416	0.814464	0.96912	0.167746	0.207017	1386	0.417908	0.967971	0.654447	0.311418	1388	0.0357777	0.956518
BMI	rs1039763	4	144168013	C	A	0.0097	3.4e-08	689685	0.4158	0.375842	0.27423	1405	0.17074	0.916639	0.022433	0.158154	1367	0.887225	0.993871	-0.138619	0.172153	1372	0.420843	0.990772	0.550017	0.235419	1416	0.0196138	0.966161	0.103066	0.201139	1386	0.608447	0.967971	0.643635	0.302957	1388	0.0338058	0.956518
BMI	rs6019482	20	47495560	T	C	-0.0178	2.8e-14	685234	0.1363	-0.0912217	0.3884	1405	0.814348	0.975217	-0.0495162	0.225163	1367	0.825972	0.993871	-0.47416	0.243041	1372	0.051269	0.92974	-0.213912	0.333913	1416	0.521874	0.966161	0.142832	0.285648	1386	0.617136	0.967971	0.893779	0.428474	1388	0.0371663	0.956518
BMI	rs615632	8	9796321	C	T	0.0174	3.2e-25	788636	0.4825	-0.181867	0.269046	1405	0.499172	0.916639	0.121468	0.15425	1367	0.431141	0.943145	0.198213	0.169439	1372	0.242281	0.978631	-0.112781	0.231553	1416	0.62629	0.966161	0.248254	0.196461	1386	0.206576	0.960448	0.622136	0.298356	1388	0.0372338	0.956518
BMI	rs12429545	13	54102206	A	G	0.0316	9.6e-38	778918	0.1499	-0.0503216	0.359975	1405	0.888845	0.98481	-0.116682	0.210383	1367	0.579248	0.952555	-0.294239	0.225796	1372	0.192754	0.978631	-0.135453	0.30997	1416	0.662187	0.966161	0.355325	0.266169	1386	0.18211	0.957738	0.835132	0.398187	1388	0.0361459	0.956518
BMI	rs420158	9	101477500	C	T	0.0119	2.1e-10	795595	0.2986	0.105658	0.302779	1405	0.727172	0.973405	0.124823	0.174355	1367	0.474169	0.943145	0.114781	0.191134	1372	0.548256	0.990772	-0.218159	0.260513	1416	0.402499	0.966161	0.346261	0.221327	1386	0.117936	0.920514	0.683651	0.336028	1388	0.0420922	0.956518
BMI	rs17619973	3	114417675	G	A	-0.02	2.4e-10	781150	0.0559	-0.0428513	0.582174	1405	0.941335	0.987505	0.161252	0.332052	1367	0.627313	0.958742	0.595598	0.364345	1372	0.102342	0.978631	0.214345	0.497731	1416	0.666793	0.966161	-0.743325	0.419514	1386	0.0766371	0.86726	-1.29278	0.637601	1388	0.0427972	0.956518
BMI	rs1045529	8	8890098	T	C	0.0161	1.6e-20	692570	0.4397	-0.18642	0.285133	1405	0.513347	0.916639	-0.0996111	0.163643	1367	0.542819	0.943145	0.128261	0.179207	1372	0.474292	0.990772	-0.213651	0.244891	1416	0.383122	0.966161	0.152335	0.20806	1386	0.464191	0.967971	0.681159	0.314789	1388	0.0306468	0.944766
BMI	rs323742	5	86769015	T	A	0.041	2e-13	681360	0.04626	-0.222815	0.642934	1405	0.728975	0.973405	0.259849	0.369564	1367	0.482101	0.943145	-0.513586	0.404993	1372	0.204967	0.978631	-0.697014	0.554004	1416	0.208551	0.966161	0.842726	0.471997	1386	0.0744096	0.86726	1.5667	0.716122	1388	0.028855	0.944766
BMI	rs16865650	2	198297156	T	C	-0.0137	2.9e-10	692481	0.163	0.117599	0.383787	1405	0.759333	0.973405	0.27932	0.222479	1367	0.209518	0.943145	-0.0641831	0.242018	1372	0.790896	0.990772	0.281547	0.33001	1416	0.393723	0.966161	-0.787205	0.28213	1386	0.00534006	0.700991	-0.919879	0.423865	1388	0.0301613	0.944766
BMI	rs7181498	15	95271404	T	C	0.0163	1e-19	690980	0.364	0.17995	0.270488	1405	0.505984	0.916639	0.00154269	0.154907	1367	0.992056	0.997005	0.201343	0.169954	1372	0.236345	0.978631	0.337461	0.232056	1416	0.146108	0.966161	0.194526	0.196923	1386	0.323411	0.967971	0.668467	0.29877	1388	0.0254199	0.890316
BMI	rs2682406	3	158026489	A	T	-0.0132	8.9e-14	684757	0.4456	-0.256684	0.262224	1405	0.327813	0.916639	0.174887	0.151213	1367	0.247657	0.943145	0.207057	0.16462	1372	0.208686	0.978631	0.0265906	0.224829	1416	0.905871	0.984638	-0.126623	0.191339	1386	0.508226	0.967971	-0.643852	0.288668	1388	0.0258799	0.890316
BMI	rs11075489	16	62803841	T	C	-0.0111	1.3e-10	688802	0.3992	0.0292328	0.280375	1405	0.916975	0.98481	0.0208464	0.161305	1367	0.89719	0.993871	-0.0702716	0.175253	1372	0.688503	0.990772	0.12296	0.241172	1416	0.610242	0.966161	0.397794	0.205109	1386	0.0526538	0.86726	0.687125	0.308096	1388	0.0258929	0.890316
BMI	rs11246991	12	132688115	T	C	0.0144	4.8e-08	641135	0.09807	0.550255	0.485025	1405	0.256785	0.916639	0.399047	0.279303	1367	0.153313	0.943145	0.265814	0.302975	1372	0.380454	0.984915	0.42491	0.417642	1416	0.309136	0.966161	-0.29389	0.356314	1386	0.409626	0.967971	-1.21945	0.534445	1388	0.0226589	0.880743
BMI	rs2307022	16	68381978	A	G	0.0135	5.5e-15	795159	0.3048	0.070636	0.283781	1405	0.803467	0.973742	0.00637547	0.162788	1367	0.968765	0.997005	-0.0482255	0.177374	1372	0.785751	0.990772	0.086271	0.243738	1416	0.72343	0.966161	-0.238661	0.207051	1386	0.249246	0.967971	-0.728273	0.311913	1388	0.0196942	0.866806
BMI	rs472611	11	119824102	G	A	0.0101	3.8e-08	686211	0.347	-0.191377	0.275382	1405	0.487202	0.916639	-0.163707	0.158691	1367	0.302438	0.943145	-0.0850445	0.172482	1372	0.622049	0.990772	0.223002	0.235972	1416	0.344803	0.966161	0.139444	0.201305	1386	0.488615	0.967971	0.696725	0.302304	1388	0.0213308	0.866806
BMI	rs6589497	11	115622993	C	T	0.0152	1.6e-08	692536	0.1219	-0.489387	0.410245	1405	0.233106	0.916639	0.155379	0.236874	1367	0.511963	0.943145	0.0410034	0.25672	1372	0.873125	0.993096	-0.0199267	0.352877	1416	0.954976	0.984679	-0.169649	0.300882	1386	0.572956	0.967971	-1.04763	0.451366	1388	0.0204315	0.866806
BMI	rs1941697	18	31251276	A	G	0.0123	1.2e-12	692446	0.4791	-0.212454	0.268514	1405	0.42895	0.916639	-0.212284	0.153984	1367	0.168245	0.943145	0.123266	0.16833	1372	0.464121	0.990772	0.0790208	0.230764	1416	0.732078	0.966161	-0.219864	0.196176	1386	0.262592	0.967971	-0.715234	0.295508	1388	0.0156342	0.735632
BMI	rs12446632	16	19935389	A	G	-0.0352	2.9e-50	788565	0.1188	0.146381	0.406462	1405	0.718801	0.973405	-0.17825	0.233673	1367	0.445705	0.943145	-0.0466017	0.255446	1372	0.85527	0.990772	0.362171	0.347822	1416	0.297937	0.966161	0.344002	0.295329	1386	0.2443	0.967971	1.1084	0.446463	1388	0.0131605	0.653636
BMI	rs6014523	20	54394975	C	T	-0.0149	1.4e-11	691275	0.2198	0.159975	0.325755	1405	0.623441	0.954904	0.191737	0.186397	1367	0.30383	0.943145	0.146873	0.20454	1372	0.47284	0.990772	-0.0632822	0.280089	1416	0.821284	0.96912	-0.245057	0.237281	1386	0.301892	0.967971	-0.902294	0.359369	1388	0.0121606	0.653636
BMI	rs12149756	16	6728603	A	G	-0.0125	3.7e-11	791455	0.2496	-0.0363064	0.33132	1405	0.912757	0.98481	-0.138363	0.189861	1367	0.466273	0.943145	-0.155662	0.208962	1372	0.456444	0.990772	-0.0418404	0.284601	1416	0.883142	0.982786	-0.165887	0.241664	1386	0.492554	0.967971	-0.926216	0.367102	1388	0.0117462	0.653636
BMI	rs2842385	6	19078274	G	A	0.012	3.4e-08	689031	0.2045	-0.31967	0.31329	1405	0.307733	0.916639	0.397802	0.180456	1367	0.0276624	0.852765	0.265532	0.197978	1372	0.180073	0.978631	-0.0466278	0.269591	1416	0.86271	0.979034	-0.634855	0.228513	1386	0.0055404	0.700991	-0.86675	0.347608	1388	0.0127667	0.653636
BMI	rs811054	16	72251132	C	T	-0.0141	2.7e-17	779353	0.46	0.00092721	0.272704	1405	0.997288	0.99775	-0.085599	0.156167	1367	0.583697	0.952555	0.0687328	0.171068	1372	0.687905	0.990772	-0.106094	0.234134	1416	0.650524	0.966161	0.156588	0.198603	1386	0.430569	0.967971	0.775912	0.300177	1388	0.00984437	0.646306
BMI	rs455527	16	89644001	C	T	-0.0199	1.1e-08	779790	0.06685	0.0281768	0.539955	1405	0.95839	0.992802	0.0115862	0.312814	1367	0.97046	0.997005	-0.804969	0.340045	1372	0.018061	0.92974	0.209731	0.465545	1416	0.652415	0.966161	0.968589	0.398243	1386	0.0151364	0.799308	1.54575	0.600239	1388	0.0101211	0.646306
BMI	rs7172627	15	31877690	A	G	-0.0117	1.1e-11	690458	0.4348	0.175399	0.280156	1405	0.531368	0.924282	0.08242	0.161413	1367	0.609703	0.952555	0.148511	0.175431	1372	0.397396	0.984915	0.0909604	0.240681	1416	0.70554	0.966161	-0.205176	0.205394	1386	0.318001	0.967971	-0.822811	0.308261	1388	0.00769262	0.5731
BMI	rs2467594	11	29224006	A	G	-0.0122	6.5e-12	691404	0.3238	0.330639	0.279443	1405	0.236929	0.916639	-0.112995	0.160403	1367	0.481278	0.943145	0.0358166	0.175787	1372	0.838579	0.990772	0.28289	0.240243	1416	0.239188	0.966161	-0.328835	0.203683	1386	0.106661	0.920514	-0.864951	0.308784	1388	0.00516329	0.447106
BMI	rs11118308	1	219633869	G	A	-0.0101	4.8e-10	794625	0.3921	0.221801	0.269579	1405	0.410779	0.916639	-0.0964638	0.155065	1367	0.53399	0.943145	-0.0616987	0.168559	1372	0.714395	0.990772	0.25852	0.231891	1416	0.265113	0.966161	-0.371036	0.197123	1386	0.0600121	0.86726	-0.824885	0.296667	1388	0.0055013	0.447106
BMI	rs294704	5	152519088	G	T	0.0113	4e-09	690036	0.2793	-0.0823065	0.304832	1405	0.787196	0.973405	-0.0891251	0.175056	1367	0.61075	0.952555	-0.0626688	0.191801	1372	0.743916	0.990772	-0.072647	0.262103	1416	0.781691	0.966161	-0.145832	0.223104	1386	0.513446	0.967971	-0.972273	0.33643	1388	0.00391317	0.404719
BMI	rs11608486	12	121670726	C	G	0.017	5.1e-12	690694	0.1089	-0.490165	0.434219	1405	0.259159	0.916639	0.0581558	0.249753	1367	0.815911	0.993871	0.109117	0.272939	1372	0.689379	0.990772	-0.500828	0.371127	1416	0.177401	0.966161	-0.193117	0.316053	1386	0.541282	0.967971	-1.37104	0.476523	1388	0.00407435	0.404719
BMI	rs761423	1	17301672	C	T	-0.0113	5.5e-11	692545	0.4408	0.436016	0.265602	1405	0.100895	0.875461	-0.183879	0.15316	1367	0.23013	0.943145	0.109922	0.166556	1372	0.509385	0.990772	0.235962	0.228572	1416	0.302095	0.966161	0.495871	0.194117	1386	0.0107413	0.7136	0.844186	0.29213	1388	0.00391582	0.404719
BMI	rs11708733	3	128039895	A	G	-0.0227	2.8e-08	683787	0.02975	0.624142	0.807572	1405	0.439735	0.916639	0.986172	0.463247	1367	0.0334489	0.879509	0.577975	0.517425	1372	0.264183	0.978631	0.892802	0.692149	1416	0.197298	0.966161	0.0867257	0.590753	1386	0.883307	0.999322	2.77987	0.906615	1388	0.00221017	0.381111
BMI	rs2246664	12	99611659	A	G	0.0137	1.8e-14	691039	0.4072	-0.0297519	0.271043	1405	0.912609	0.98481	0.140384	0.156179	1367	0.368882	0.943145	-0.0136049	0.169788	1372	0.936147	0.996224	0.172231	0.232935	1416	0.45979	0.966161	0.00362024	0.199004	1386	0.985488	0.999322	0.899414	0.297626	1388	0.00255779	0.381111
BMI	rs1657930	15	57120989	G	A	0.0123	1.6e-08	684138	0.3174	0.285219	0.346262	1405	0.410246	0.916639	-0.223624	0.199407	1367	0.262296	0.943145	-0.247309	0.217777	1372	0.25632	0.978631	0.0562691	0.297384	1416	0.849952	0.977938	0.228707	0.253345	1386	0.366817	0.967971	1.22864	0.381354	1388	0.00130377	0.377552
BMI	rs7200919	16	67316600	A	G	0.0095	9.3e-09	793695	0.4779	-0.009307	0.266188	1405	0.972113	0.992802	-0.0835694	0.153433	1367	0.586075	0.952555	-0.0814138	0.16766	1372	0.627337	0.990772	-0.188597	0.228674	1416	0.409659	0.966161	0.326683	0.194709	1386	0.0936142	0.920514	0.976674	0.293098	1388	0.00088434	0.377552
BMI	rs1409818	20	21381121	T	C	0.0201	2.5e-12	690984	0.1466	0.26261	0.371954	1405	0.480289	0.916639	-0.264673	0.214772	1367	0.218034	0.943145	-0.189231	0.233598	1372	0.418042	0.990772	0.149486	0.318208	1416	0.63859	0.966161	0.573999	0.271509	1386	0.0346855	0.841976	1.34381	0.407647	1388	0.0010039	0.377552
BMI	rs4722398	7	3125220	T	C	0.0158	3.6e-10	692509	0.1208	-0.183137	0.402406	1405	0.649105	0.962354	0.0770133	0.231874	1367	0.739839	0.982546	0.221965	0.253076	1372	0.380605	0.984915	-0.125425	0.344306	1416	0.715702	0.966161	-0.686726	0.292012	1386	0.0188281	0.832553	-1.38438	0.440011	1388	0.00168927	0.377552
